# Supplementary material
Source: PubMed Central journal article supplement (PMC3026350)
Supplement: tableS1.pdf [file tableS1.pdf]

**Table A: D0<D2<D4<D6**

| Gene Title                                                                                                                     | Gene Identifier | D2/D0 | D4/D0 | D6/D0 | P     |
|--------------------------------------------------------------------------------------------------------------------------------|-----------------|-------|-------|-------|-------|
| (clone MKT3) bone morphogenetic protein 1 (BMP-1)                                                                              | L24755          | 1.23  | 1.78  | 2.05  | 0.001 |
| (strain C57Bl/6) mRNA sequence                                                                                                 | AI481797        | 1.33  | 2.04  | 6.42  | 0.001 |
| 2'-5' oligoadenylate synthetase-like 2, mRNA (cDNA clone MGC:6269 IMAGE:2646375)                                               | BQ033138        | 1.03  | 1.08  | 2.8   | 0.002 |
| 5-hydroxytryptamine (serotonin) receptor 7 (Htr7), mRNA                                                                        | BQ175864        | 2.16  | 2.5   | 3.02  | 0.006 |
| 6-phosphofructo-2-kinase/fructose-2,6-biphosphatase 3 (Pfkfb3), mRNA                                                           | NM_133232       | 1.37  | 1.79  | 4.32  | 0.001 |
| A disintegrin and metallopeptidase domain 12 (meltrin alpha) (Adam12), mRNA                                                    | NM_007400       | 1.07  | 1.19  | 3.61  | 0.001 |
| A disintegrin-like and metallopeptidase (reprolysin type) with thrombospondin type 1 motif, 2, mRNA (cDNA clone IMAGE:4004191) | BM125019        | 1.05  | 1.51  | 2.04  | 0.001 |
| A disintegrin-like and metallopeptidase (reprolysin type) with thrombospondin type 1 motif, 6 (Adamts6), mRNA                  | AV286717        | 1.05  | 2.82  | 5.61  | 0.006 |
| Abhydrolase domain containing 9, mRNA (cDNA clone MGC:175684 IMAGE:40131100)                                                   | AK010021        | 1.15  | 1.21  | 2.22  | 0.008 |
| Activated macrophage/microglia WAP domain protein precursor (Amwap)                                                            | AA666504        | 1.1   | 1.77  | 5.33  | 0.001 |
| Acyl-CoA synthetase long-chain family member 4, mRNA (cDNA clone MGC:5674 IMAGE:3157957)                                       | BQ174545        | 1.09  | 1.36  | 2.05  | 0.001 |
| Adenomatosis polyposis coli down-regulated 1 (Apcdd1), mRNA                                                                    | BB770932        | 1.24  | 2.07  | 2.43  | 0.004 |
| Adenosine A2b receptor (Adora2b), mRNA                                                                                         | BB709140        | 1.07  | 1.38  | 2.69  | 0.002 |
| Adenylate cyclase 4 (Adcy4), mRNA                                                                                              | NM_080435       | 1.73  | 2.02  | 2.94  | 0.001 |
| Adenylate kinase 3-like 1 (Ak3l1), nuclear gene encoding mitochondrial protein, mRNA                                           | NM_009647       | 1.08  | 1.34  | 2.14  | 0.006 |
| AE binding protein 1 (Aebp1), mRNA                                                                                             | NM_009636       | 1.31  | 1.76  | 2.24  | 0.003 |
| Aldehyde dehydrogenase family 1, subfamily A2 (Aldh1a2),                                                                       | NM_009022       | 1.15  | 1.65  | 2.5   | 0.001 |

|                                                                                                           |           |      |      |      |       |
|-----------------------------------------------------------------------------------------------------------|-----------|------|------|------|-------|
| mRNA                                                                                                      |           |      |      |      |       |
| Alkaline phosphatase                                                                                      | AW319615  | 1.22 | 1.31 | 2.64 | 0.001 |
| Allograft inflammatory factor 1, mRNA (cDNA clone MGC:35939 IMAGE:5346103)                                | NM_019467 | 1.15 | 2.2  | 4.33 | 0.001 |
| Ankyrin repeat domain 1 (cardiac muscle), mRNA (cDNA clone MGC:46879 IMAGE:4953125)                       | AK009959  | 1.38 | 4.43 | 4.97 | 0.001 |
| Apolipoprotein B48 receptor, mRNA (cDNA clone MGC:28748 IMAGE:4482457)                                    | NM_138310 | 1.1  | 1.28 | 2.43 | 0.002 |
| Apolipoprotein D (Apod), mRNA                                                                             | NM_007470 | 1.15 | 1.52 | 2.79 | 0.001 |
| Arachidonate 5-lipoxygenase activating protein, mRNA (cDNA clone MGC:41698 IMAGE:1349819)                 | BC026209  | 1.19 | 1.4  | 3.5  | 0.001 |
| Arylsulfatase i, mRNA (cDNA clone IMAGE:3991175)                                                          | BC020108  | 1.14 | 1.21 | 2.03 | 0.003 |
| Aspartate-beta-hydroxylase (Asph), transcript variant 2, mRNA                                             | BG066545  | 3.48 | 3.66 | 4.14 | 0.001 |
| ATPase, class I, type 8B, member 4, mRNA (cDNA clone IMAGE:40142776)                                      | BM246630  | 1.37 | 1.85 | 3.22 | 0.001 |
| ATPase, H <sup>+</sup> transporting, lysosomal V0 subunit D2, mRNA (cDNA clone MGC:107216 IMAGE:30504725) | BB769890  | 1.38 | 1.83 | 2.53 | 0.001 |
| ATPase, Na <sup>+</sup> /K <sup>+</sup> transporting, beta 2 polypeptide (Atp1b2), mRNA                   | BG261955  | 1.22 | 1.8  | 2.2  | 0.001 |
| ATP-binding cassette, sub-family C (CFTR/MRP), member 9                                                   | NM_021043 | 1.28 | 1.57 | 2.59 | 0.001 |
| Basic leucine zipper transcription factor, ATF-like 3, mRNA (cDNA clone MGC:151460 IMAGE:40126402)        | AK020278  | 1.21 | 1.73 | 2.09 | 0.001 |
| B-cell leukemia/lymphoma 2 related protein A1a (Bcl2a1a), mRNA                                            | L16462    | 1.17 | 1.61 | 3.78 | 0.001 |
| Betaglycan                                                                                                | BM122301  | 1.32 | 1.62 | 2.11 | 0.001 |
| BMP-binding endothelial regulator (Bmper), mRNA                                                           | AK014221  | 1.15 | 1.48 | 3.36 | 0.001 |
| Calcium channel, voltage-dependent, alpha2/delta subunit 1 (Cacna2d1), transcript variant e, mRNA         | BI106777  | 1.29 | 1.76 | 2.08 | 0.001 |
| CAP-GLY domain containing linker protein family, member 4, mRNA (cDNA clone MGC:30350 IMAGE:4920788)      | AV042829  | 2.46 | 3.1  | 9.92 | 0.003 |

|                                                                             |           |      |      |      |       |
|-----------------------------------------------------------------------------|-----------|------|------|------|-------|
| Carbohydrate sulfotransferase 11 (Chst11), mRNA                             | AK003880  | 1.09 | 1.37 | 2.83 | 0.001 |
| Carboxypeptidase X 1 (M14 family), mRNA (cDNA clone MGC:5707 IMAGE:3593211) | NM_019696 | 1.28 | 2.01 | 7.47 | 0.001 |
| Cardiotrophin-like cytokine factor 1 (Clcf1), mRNA                          | BB825816  | 1.09 | 1.22 | 2.51 | 0.001 |
| Caspase 12, mRNA (cDNA clone MGC:36090 IMAGE:5375109)                       | NM_009808 | 1.51 | 2.36 | 2.85 | 0.001 |
| Cathepsin K (Ctsk), mRNA                                                    | NM_007802 | 1.21 | 1.89 | 2.52 | 0.001 |
| CD200 antigen (Cd200), mRNA                                                 | AF004023  | 1.1  | 1.65 | 2.06 | 0.001 |
| CD200 receptor 4, mRNA (cDNA clone MGC:163577 IMAGE:40130223)               | BB770873  | 1.98 | 2.5  | 4.58 | 0.001 |
| CD244 natural killer cell receptor 2B4 (Cd244), mRNA                        | NM_018729 | 1.05 | 1.56 | 2.94 | 0.002 |
| CD33 antigen (Cd33), transcript variant 2, mRNA                             | NM_021293 | 1.05 | 2.09 | 3.39 | 0.002 |
| CD40 antigen (Cd40), transcript variant 5, mRNA                             | AI385482  | 1.01 | 1.28 | 2.26 | 0.007 |
| CD68 antigen, mRNA (cDNA clone MGC:13848 IMAGE:3981024)                     | BC021637  | 1.32 | 1.88 | 3.68 | 0.001 |
| CD84 leukocyte antigen (CD84)                                               | NM_013489 | 1.07 | 1.37 | 2.32 | 0.001 |
| CD86 antigen, mRNA (cDNA clone MGC:18471 IMAGE:4008635)                     | NM_019388 | 1.54 | 1.59 | 2.72 | 0.001 |
| CDNA clone IMAGE:30699183                                                   | BB055155  | 1.77 | 2.03 | 2.07 | 0.001 |
| CDNA clone IMAGE:4912398                                                    | BB039247  | 1.29 | 2.16 | 2.8  | 0.001 |
| CDNA clone IMAGE:9053568                                                    | AV235932  | 1.71 | 1.97 | 3.1  | 0.004 |
| CDNA clone MGC:40659 IMAGE:4923983                                          | U07662    | 1.29 | 1.31 | 2.14 | 0.007 |
| CDNA sequence BC034090, mRNA (cDNA clone IMAGE:4482000)                     | BI738434  | 1.91 | 3.51 | 7.26 | 0.001 |
| Cell adhesion molecule 3, mRNA (cDNA clone IMAGE:5364869)                   | AY059393  | 1.1  | 1.84 | 2.16 | 0.005 |
| Cell adhesion molecule 4 (Cadm4), mRNA                                      | AY059394  | 1.26 | 1.69 | 2.42 | 0.001 |
| Cell adhesion molecule with homology to L1CAM (Chl1), mRNA                  | NM_007697 | 1.26 | 2.38 | 4.75 | 0.001 |

|                                                                              |           |      |      |        |       |
|------------------------------------------------------------------------------|-----------|------|------|--------|-------|
| Ceruloplasmin (Cp), transcript variant 2, mRNA                               | BB009037  | 1.94 | 2.6  | 6.2    | 0.001 |
| ceruloplasmin /FL=gb:U49430.1 gb:NM_007752.1                                 | BB332449  | 1.18 | 2.01 | 2.44   | 0.001 |
| C-fos induced growth factor (Figf), mRNA                                     | BB359521  | 1.15 | 1.49 | 2.64   | 0.002 |
| Chemokine (C-C motif) ligand 11, mRNA (cDNA clone MGC:41147 IMAGE:1527856)   | NM_011330 | 1.39 | 1.81 | 2.99   | 0.003 |
| Chemokine (C-C motif) ligand 12, mRNA (cDNA clone MGC:41146 IMAGE:1548072)   | U50712    | 1.35 | 2.25 | 4.74   | 0.001 |
| Chemokine (C-C motif) ligand 19 (Ccl19), mRNA                                | NM_011888 | 1.95 | 3.11 | 10.3   | 0.001 |
| Chemokine (C-C motif) ligand 21C (leucine) (Ccl21c), mRNA                    | NM_011335 | 1.81 | 3.06 | 3.38   | 0.001 |
| Chemokine (C-C motif) ligand 22, mRNA (cDNA clone MGC:13812 IMAGE:4192393)   | BC012658  | 2.67 | 4.07 | 5.32   | 0.001 |
| Chemokine (C-C motif) ligand 3 (Ccl3), mRNA                                  | NM_011337 | 1.52 | 2.96 | 23.46  | 0.001 |
| Chemokine (C-C motif) ligand 7 (Ccl7), mRNA                                  | AF128193  | 1.37 | 1.58 | 8.48   | 0.001 |
| Chemokine (C-C motif) ligand 8 (Ccl8), mRNA                                  | NM_021443 | 1.61 | 2.72 | 8.94   | 0.001 |
| Chemokine (C-C motif) receptor 2 (Ccr2), mRNA                                | BB148128  | 1.18 | 1.44 | 6.48   | 0.001 |
| Chemokine (C-C motif) receptor 5 (Ccr5), mRNA                                | D83648    | 1.25 | 2.04 | 4.88   | 0.001 |
| Chemokine (C-X-C motif) ligand 10, mRNA (cDNA clone MGC:41087 IMAGE:1446589) | NM_021274 | 1.15 | 1.96 | 7.37   | 0.001 |
| Chemokine (C-X-C motif) ligand 13, mRNA (cDNA clone MGC:13851 IMAGE:4217539) | AF030636  | 1.25 | 1.32 | 2.39   | 0.001 |
| Chemokine (C-X-C motif) ligand 5, mRNA (cDNA clone MGC:36180 IMAGE:4976854)  | NM_009141 | 1.05 | 1.75 | 19.81  | 0.001 |
| Chemokine (C-X-C motif) ligand 9, mRNA (cDNA clone MGC:6179 IMAGE:3257716)   | NM_008599 | 1.94 | 5.42 | 28.2   | 0.001 |
| Chemokine binding protein 2 (Ccbp2), mRNA                                    | AV220666  | 1.51 | 1.78 | 2.3    | 0.001 |
| Chitinase 3-like 1, mRNA (cDNA clone MGC:7884 IMAGE:3582304)                 | BC005611  | 1.33 | 2.22 | 6.87   | 0.001 |
| Chitinase 3-like 3 (Chi3l3), mRNA                                            | NM_009892 | 1.93 | 7.71 | 134.17 | 0.001 |
| Chitinase 3-like 4 (Chi3l4), mRNA                                            | AY065557  | 3.15 | 3.97 | 32.15  | 0.001 |

|                                                                                                     |           |      |      |       |       |
|-----------------------------------------------------------------------------------------------------|-----------|------|------|-------|-------|
| Chondroitin sulfate synthase 1, mRNA (cDNA clone IMAGE:40061623)                                    | BQ174991  | 1.06 | 1.72 | 2.16  | 0.001 |
| Chordin-like 2 (Chrdl2), mRNA                                                                       | NM_133709 | 1.97 | 3.53 | 11.27 | 0.001 |
| CKLF-like MARVEL transmembrane domain containing 3, mRNA (cDNA clone MGC:7225 IMAGE:3483351)        | NM_024217 | 1.14 | 1.61 | 2.35  | 0.001 |
| Clone MEX2B-5 Mid1 mRNA, partial sequence                                                           | BB276544  | 1.49 | 2.4  | 4.98  | 0.001 |
| Coagulation factor XIII, A1 subunit (F13a1), mRNA                                                   | NM_028784 | 1.09 | 1.17 | 2.33  | 0.001 |
| Coiled-coil domain containing 80 (Ccdc80), mRNA                                                     | BG074158  | 1.15 | 1.54 | 2.05  | 0.001 |
| Collagen and calcium binding EGF domains 1, mRNA (cDNA clone MGC:161179 IMAGE:40140631)             | BB197647  | 2.43 | 2.46 | 3.57  | 0.006 |
| Collagen, type XVIII, alpha 1 (Col18a1), transcript variant 2, mRNA                                 | NM_009929 | 1.39 | 1.71 | 3.27  | 0.001 |
| Colony stimulating factor 2 receptor, beta 2, low-affinity (granulocyte-macrophage) (Csf2rb2), mRNA | NM_007781 | 1.59 | 2.05 | 4.9   | 0.001 |
| complement component 1, q subcomponent, beta polypeptide                                            | BB111335  | 1.09 | 1.65 | 3.07  | 0.001 |
| Complement component 3 (C3), mRNA                                                                   | K02782    | 1.11 | 1.98 | 5.51  | 0.001 |
| Complement component 3a receptor 1, mRNA (cDNA clone MGC:5787 IMAGE:3593758)                        | BB333624  | 1.2  | 1.85 | 3.17  | 0.001 |
| Complement component 4B (Childo blood group) (C4b), mRNA                                            | NM_009780 | 1.39 | 1.96 | 3.47  | 0.001 |
| Complement component factor h (Cfh), mRNA                                                           | AI987976  | 1.05 | 1.35 | 2.27  | 0.001 |
| Contactin associated protein-like 2, mRNA (cDNA clone IMAGE:4456740)                                | AU079588  | 1.65 | 2.01 | 2.03  | 0.001 |
| Corpos mRNA, 3' untranslated region                                                                 | BM220939  | 1.22 | 1.39 | 2.2   | 0.001 |
| C-type lectin domain family 4, member a3 (Clec4a3), mRNA                                            | AK014135  | 1.03 | 1.63 | 3.65  | 0.001 |
| C-type lectin domain family 4, member e, mRNA (cDNA clone MGC:5682 IMAGE:3158063)                   | NM_019948 | 1.68 | 3.71 | 46.61 | 0.001 |
| C-type lectin domain family 4, member n, mRNA (cDNA clone MGC:35901 IMAGE:5376247)                  | AF240358  | 1.38 | 1.54 | 2.72  | 0.001 |
| C-type lectin domain family 7, member a, mRNA (cDNA clone                                           | NM_020008 | 1.5  | 2.62 | 4.82  | 0.001 |

|                                                                                                       |           |      |      |      |       |
|-------------------------------------------------------------------------------------------------------|-----------|------|------|------|-------|
| MGC:29217 IMAGE:5036647)                                                                              |           |      |      |      |       |
| Cysteine-rich secretory protein LCCL domain containing 2, mRNA (cDNA clone MGC:116029 IMAGE:30653388) | BB558800  | 1.27 | 1.57 | 2.55 | 0.001 |
| Cytidine 5'-triphosphate synthase, mRNA (cDNA clone MGC:5946 IMAGE:3498717)                           | NM_016748 | 1.1  | 1.44 | 2.68 | 0.001 |
| Cytochrome P450, family 1, subfamily b, polypeptide 1 (Cyp1b1), mRNA                                  | BI251808  | 1.54 | 2.15 | 4.78 | 0.001 |
| Cytochrome P450, family 4, subfamily f, polypeptide 18, mRNA (cDNA clone MGC:19144 IMAGE:4218398)     | NM_024444 | 1.29 | 1.54 | 3.32 | 0.001 |
| Cytochrome P450, family 7, subfamily b, polypeptide 1, mRNA (cDNA clone MGC:46910 IMAGE:5098739)      | NM_007825 | 1.14 | 1.62 | 3.08 | 0.001 |
| cytokine inducible SH2-containing protein 3                                                           | BB831725  | 1.22 | 2.34 | 9.73 | 0.001 |
| Cytokine receptor-like factor 2, mRNA (cDNA clone MGC:36784 IMAGE:5346748)                            | NM_016715 | 1.19 | 1.48 | 2.44 | 0.001 |
| Cytotoxic T lymphocyte-associated protein 2 alpha, mRNA (cDNA clone MGC:41186 IMAGE:1244311)          | NM_007796 | 1.78 | 1.79 | 3.29 | 0.001 |
| Dedicator of cyto-kinesis 2 (Dock2), mRNA                                                             | NM_033374 | 1.05 | 1.79 | 3.36 | 0.001 |
| Dendritic cell immunoreceptor                                                                         | BC006623  | 1.09 | 1.38 | 2.8  | 0.001 |
| DENN/MADD domain containing 1C (Dennd1c), mRNA                                                        | BB168293  | 1.03 | 2.68 | 6.54 | 0.007 |
| Diacylglycerol lipase, beta (Daglb), mRNA                                                             | BC016105  | 1.41 | 1.49 | 2.17 | 0.001 |
| Disabled homolog 2 (Drosophila), mRNA (cDNA clone MGC:18401 IMAGE:4242174)                            | BC006588  | 1.23 | 1.77 | 2.1  | 0.001 |
| DNA segment, Chr 1, ERATO Doi 471, expressed, mRNA (cDNA clone IMAGE:5064213)                         | AI852300  | 1.03 | 1.5  | 2.75 | 0.001 |
| DNA segment, Chr 16, ERATO Doi 472, expressed (D16Ert472e), mRNA                                      | AV381575  | 1.04 | 1.51 | 2.07 | 0.001 |
| Dysferlin (Dysf), transcript variant 1, mRNA                                                          | AF188290  | 1.35 | 1.89 | 2.63 | 0.001 |
| Ecotropic viral integration site 2a, mRNA (cDNA clone MGC:47928 IMAGE:1396641)                        | NM_010161 | 1.07 | 1.46 | 2.37 | 0.001 |
| ectonucleoside triphosphate diphosphohydrolase 1                                                      | AV117919  | 1.28 | 1.59 | 2.06 | 0.001 |

|                                                                                                                           |           |      |      |      |       |
|---------------------------------------------------------------------------------------------------------------------------|-----------|------|------|------|-------|
| EGF-like module containing, mucin-like, hormone receptor-like sequence 4 (Emr4), mRNA                                     | AF396935  | 2.32 | 2.88 | 6.84 | 0.001 |
| Embigin, mRNA (cDNA clone MGC:21425 IMAGE:4500922)                                                                        | BG064842  | 1.33 | 1.8  | 2.98 | 0.001 |
| Ena-VASP-like isoform (Evl1) mRNA, complete cds, alternatively spliced                                                    | AW553781  | 1.28 | 1.98 | 2.39 | 0.001 |
| Endothelial cell-specific chemotaxis regulator (Ecsr), mRNA                                                               | BB736636  | 1.13 | 1.72 | 2.26 | 0.001 |
| Endothelin receptor type A, mRNA (cDNA clone MGC:6567 IMAGE:2812426)                                                      | AW558570  | 1.22 | 1.48 | 2.35 | 0.001 |
| Endothelin receptor type B, mRNA (cDNA clone MGC:36102 IMAGE:4971909)                                                     | BF100813  | 1.2  | 1.38 | 2.17 | 0.001 |
| Eosinophil-associated ribonuclease EAR2 (Ear2)                                                                            | AF306665  | 1.53 | 1.91 | 2.64 | 0.001 |
| Eph-related receptor tyrosine kinase (Mek4) secreted                                                                      | AV226618  | 1.2  | 1.76 | 2.47 | 0.001 |
| Ephrin A2 (Efna2), mRNA                                                                                                   | BB790825  | 1.26 | 3.05 | 5.69 | 0.001 |
| Epidermal growth factor-containing fibulin-like extracellular matrix protein 2, mRNA (cDNA clone MGC:18729 IMAGE:3980048) | NM_021474 | 1.07 | 1.44 | 2.31 | 0.001 |
| Epithelial membrane protein 3, mRNA (cDNA clone MGC:5759 IMAGE:3485948)                                                   | BC001999  | 1.42 | 1.47 | 2.12 | 0.001 |
| Epithelial mitogen (Epgn), mRNA                                                                                           | NM_053087 | 2.48 | 3.05 | 8.88 | 0.003 |
| ESTs                                                                                                                      | BB311508  | 2.11 | 6.65 | 7.17 | 0.009 |
| ESTs                                                                                                                      | BB485297  | 3.04 | 3.98 | 8.16 | 0.004 |
| ESTs                                                                                                                      | AV252273  | 2.62 | 2.76 | 5.13 | 0.001 |
| ESTs                                                                                                                      | BB026411  | 2.62 | 2.82 | 3.64 | 0.009 |
| ESTs                                                                                                                      | BG076296  | 1.47 | 2.79 | 7.37 | 0.001 |
| ESTs                                                                                                                      | BB040443  | 1.5  | 2.81 | 3.88 | 0.001 |
| ESTs                                                                                                                      | BG064632  | 1.68 | 2.59 | 2.88 | 0.001 |
| ESTs                                                                                                                      | BB208329  | 1.25 | 1.41 | 2.75 | 0.004 |
| ESTs                                                                                                                      | BM240648  | 1.18 | 1.47 | 2.62 | 0.001 |
| ESTs                                                                                                                      | BB147698  | 1.4  | 1.56 | 2.6  | 0.001 |

|                                                                                                 |           |      |      |       |       |
|-------------------------------------------------------------------------------------------------|-----------|------|------|-------|-------|
| ESTs                                                                                            | AV086906  | 1.06 | 1.71 | 2.15  | 0.001 |
| ESTs                                                                                            | AV247013  | 1.4  | 1.71 | 2.8   | 0.001 |
| ESTs                                                                                            | BB360028  | 1.27 | 1.8  | 2.62  | 0.001 |
| ESTs                                                                                            | AI426427  | 1.09 | 1.76 | 2.01  | 0.004 |
| ESTs                                                                                            | AV323441  | 1.27 | 1.8  | 2.18  | 0.001 |
| ESTs                                                                                            | BB053468  | 1.17 | 1.85 | 2.04  | 0.001 |
| ESTs, Moderately similar to POL2 MOUSE RETROVIRUS-RELATED POL POLYPROTEIN (M.musculus)          | BG074662  | 1.58 | 1.9  | 2.02  | 0.001 |
| ESTs, Weakly similar to S12207 hypothetical protein (M.musculus)                                | BB765023  | 1.56 | 3.23 | 3.77  | 0.006 |
| ESTs, Weakly similar to SFRB_HUMAN SPLICING FACTOR ARGININESERINE-RICH 11 (H.sapiens)           | BB135602  | 1.5  | 2.25 | 4.08  | 0.003 |
| ESTs, Weakly similar to TLM MOUSE TLM PROTEIN (M.musculus)                                      | BG092263  | 1.39 | 1.66 | 2.03  | 0.001 |
| Eukaryotic translation initiation factor 4E member 3, mRNA (cDNA clone MGC:35709 IMAGE:5369891) | BC027014  | 1.3  | 1.35 | 2.26  | 0.001 |
| expressed sequence AI120166                                                                     | BM239362  | 1.04 | 1.65 | 2.29  | 0.003 |
| expressed sequence AI132464                                                                     | AV238324  | 1.08 | 1.59 | 2.49  | 0.001 |
| expressed sequence AI323359                                                                     | AI323359  | 1.09 | 1.67 | 2.34  | 0.001 |
| Expressed sequence AW551984, mRNA (cDNA clone MGC:74355 IMAGE:30250574)                         | AV220682  | 1.25 | 1.88 | 2.41  | 0.001 |
| expressed sequence C79607                                                                       | BG066644  | 1.02 | 1.38 | 2.11  | 0.001 |
| Family with sequence similarity 26, member F, mRNA (cDNA clone MGC:106111 IMAGE:4945137)        | BB239429  | 2.09 | 8.9  | 25.81 | 0.001 |
| family with sequence similarity 84, member A                                                    | BC002154  | 1.42 | 1.86 | 2.6   | 0.001 |
| Fas (TNF receptor superfamily member 6) (Fas), mRNA                                             | NM_007987 | 1.73 | 1.74 | 2.72  | 0.001 |
| Fatty acid binding protein 5, epidermal, mRNA (cDNA clone MGC:5786 IMAGE:3490535)               | BC002008  | 1.04 | 1.54 | 3.43  | 0.005 |
| Fc gamma receptor III (Fcgr3) mRNA, Fcgr3-b allele                                              | NM_010188 | 1.18 | 1.85 | 3.88  | 0.001 |



|                                                                                                 |           |      |      |      |       |
|-------------------------------------------------------------------------------------------------|-----------|------|------|------|-------|
| Fc receptor, IgE, high affinity I, gamma polypeptide, mRNA (cDNA clone MGC:36077 IMAGE:5065647) | NM_010185 | 1.16 | 1.82 | 4.45 | 0.001 |
| Fc receptor, IgG, high affinity I, mRNA (cDNA clone IMAGE:5249690)                              | AF143181  | 1.11 | 1.34 | 3.82 | 0.001 |
| Fc receptor, IgG, low affinity IIb, mRNA (cDNA clone MGC:46888 IMAGE:3993915)                   | M14216    | 1.32 | 1.8  | 3.8  | 0.001 |
| Fc receptor, IgG, low affinity IV (Fcgr4), mRNA                                                 | BC027310  | 1.29 | 1.9  | 6.47 | 0.001 |
| Feline sarcoma oncogene, mRNA (cDNA clone MGC:150316 IMAGE:40111855)                            | BG867327  | 1.31 | 1.44 | 2.05 | 0.001 |
| Fibronectin type III domain containing 4, mRNA (cDNA clone IMAGE:4953822)                       | AK013203  | 1.57 | 2.21 | 2.87 | 0.001 |
| Fibulin 2, mRNA (cDNA clone MGC:6112 IMAGE:3490759)                                             | BF228318  | 1.04 | 1.37 | 2.15 | 0.001 |
| Follistatin (Fst), mRNA                                                                         | BB444134  | 1.09 | 1.12 | 2.24 | 0.001 |
| Friend leukemia integration 1 (Fli1), mRNA                                                      | BB138212  | 1.02 | 1.45 | 2.03 | 0.001 |
| FXYD domain-containing ion transport regulator 5 (Fxyd5), transcript variant 2, mRNA            | NM_008761 | 1.06 | 1.42 | 2.78 | 0.001 |
| FYN binding protein FYB-130                                                                     | BB157866  | 1.13 | 1.4  | 2.24 | 0.001 |
| G protein-coupled receptor 126, mRNA (cDNA clone IMAGE:30437066)                                | BB812574  | 1.3  | 1.88 | 2.01 | 0.001 |
| G protein-coupled receptor 133, mRNA (cDNA clone MGC:184061 IMAGE:9088050)                      | BB548889  | 1.13 | 1.35 | 2.17 | 0.001 |
| G protein-coupled receptor 146, mRNA (cDNA clone MGC:7035 IMAGE:3156060)                        | BQ177047  | 1.53 | 1.83 | 2.74 | 0.001 |
| G protein-coupled receptor 176 (Gpr176), mRNA                                                   | BB311924  | 1.2  | 1.61 | 2.81 | 0.001 |
| G protein-coupled receptor 182 (Gpr182), mRNA                                                   | NM_007412 | 1.26 | 1.56 | 2.43 | 0.001 |
| G protein-coupled receptor 84, mRNA (cDNA clone MGC:30824 IMAGE:3995193)                        | NM_030720 | 1.34 | 2.18 | 9.9  | 0.005 |
| G protein-coupled receptor 87 (Gpr87), mRNA                                                     | NM_032399 | 1.79 | 1.86 | 2.56 | 0.001 |
| Gamma-glutamyltransferase 5 (Ggt5), mRNA                                                        | NM_011820 | 1.33 | 1.86 | 3.15 | 0.001 |

|                                                                             |           |      |      |       |       |
|-----------------------------------------------------------------------------|-----------|------|------|-------|-------|
| Gap junction channel subunit protein connexin37 (Gja4)                      | AF216832  | 1.1  | 1.61 | 2.2   | 0.001 |
| Gap junction protein, alpha 1, mRNA (cDNA clone MGC:11552 IMAGE:3599347)    | AV330726  | 1.1  | 1.69 | 2.33  | 0.001 |
| Glial fibrillary acidic protein [Mus musculus], mRNA sequence               | BB750040  | 4.51 | 9.68 | 12.76 | 0.001 |
| Glutamate receptor, ionotropic, NMDA3B (Grin3b), mRNA                       | NM_130455 | 1.07 | 2.68 | 3.45  | 0.005 |
| Glycine/arginine rich protein 1 (Grrp1), mRNA                               | AK012898  | 1.13 | 1.49 | 2.66  | 0.001 |
| Glycoprotein (transmembrane) nmb, mRNA (cDNA clone MGC:31121 IMAGE:4164706) | NM_053110 | 1.97 | 3.46 | 4.99  | 0.001 |
| Glycoprotein m6b, mRNA (cDNA clone MGC:35819 IMAGE:3981536)                 | AK016567  | 1.25 | 1.89 | 2.61  | 0.001 |
| GPI-anchored membrane protein CDw108 precursor (CDw108)                     | AA144045  | 1.16 | 1.32 | 2.8   | 0.001 |
| G-protein coupled receptor 65, mRNA (cDNA clone MGC:18408 IMAGE:3661818)    | NM_008152 | 1.23 | 1.29 | 2.36  | 0.001 |
| Growth arrest-specific 7-cb protein (Gas7-cb)                               | AI506234  | 1.17 | 1.67 | 2.12  | 0.001 |
| Growth factor receptor bound protein 10, mRNA (cDNA clone IMAGE:1313582)    | AF022072  | 1.25 | 1.64 | 2.33  | 0.001 |
| GTPase, IMAP family member 8, mRNA (cDNA clone MGC:169567 IMAGE:8860962)    | BM243674  | 1.08 | 1.64 | 2.05  | 0.003 |
| GTPase, very large interferon inducible 1                                   | BM243571  | 1.03 | 1.61 | 4.04  | 0.001 |
| Guanylate binding protein 2, mRNA (cDNA clone MGC:41173 IMAGE:1230883)      | BE197524  | 1.71 | 3.74 | 7.55  | 0.001 |
| Guanylate binding protein 3, mRNA (cDNA clone MGC:29218 IMAGE:5036920)      | NM_018734 | 1.08 | 2.34 | 3.62  | 0.001 |
| Guanylate binding protein 6 (Gbp6), mRNA                                    | BM241271  | 1.26 | 2.22 | 3.81  | 0.001 |
| Guanylate-binding protein 10 (Gbp10)                                        | BG092512  | 1.01 | 2.68 | 7.1   | 0.001 |
| Heat shock protein 2, mRNA (cDNA clone MGC:7795 IMAGE:3499661)              | BC004714  | 1.27 | 1.8  | 2.1   | 0.001 |
| Hedgehog interacting protein-like 1 (Hhip11), mRNA                          | AK005401  | 1.22 | 1.31 | 2.38  | 0.002 |
| Hematopoietic cell specific Lyn substrate 1, mRNA (cDNA                     | NM_008225 | 1.07 | 1.85 | 3.53  | 0.001 |

|                                                                                             |           |      |      |       |       |
|---------------------------------------------------------------------------------------------|-----------|------|------|-------|-------|
| clone MGC:6056 IMAGE:3593456)                                                               |           |      |      |       |       |
| Hexokinase 3, mRNA (cDNA clone MGC:143940 IMAGE:40095267)                                   | BB334625  | 1.16 | 1.32 | 2.46  | 0.001 |
| Hexose-6-phosphate dehydrogenase (glucose 1-dehydrogenase), mRNA (cDNA clone IMAGE:4952442) | BC027358  | 1.34 | 1.53 | 2     | 0.001 |
| High mobility group nucleosomal binding domain 3 (Hmgn3), transcript variant 1, mRNA        | AV018952  | 1.25 | 1.91 | 2.04  | 0.001 |
| Histidine ammonia lyase (Hal), mRNA                                                         | L07645    | 1.64 | 3.47 | 4.74  | 0.004 |
| Histocompatibility 2, class II antigen A, beta 1, mRNA (cDNA clone MGC:6297 IMAGE:2651058)  | M15848    | 1.16 | 1.41 | 2.05  | 0.003 |
| Histocompatibility 2, class II, locus Mb1, mRNA (cDNA clone MGC:5741 IMAGE:3486844)         | NM_010387 | 1.16 | 1.47 | 2.2   | 0.001 |
| Histone deacetylase-related protein A (Hdrpa) mRNA, complete cds, alternatively spliced     | BB750646  | 1.04 | 1.64 | 2.64  | 0.001 |
| Huntingtin interacting protein 1 (Hip1), mRNA                                               | BB794880  | 1.36 | 1.72 | 2.07  | 0.001 |
| Hyaluronan synthase1 (Has1), mRNA                                                           | NM_008215 | 1.35 | 2.13 | 4.01  | 0.005 |
| Hydroxysteroid 11-beta dehydrogenase 1 (Hsd11b1), transcript variant 1, mRNA                | NM_008288 | 1.27 | 1.38 | 2.33  | 0.001 |
| Immune-responsive gene 1 (Irg1) mRNA, 3' end of cds                                         | L38281    | 1.04 | 1.48 | 48.85 | 0.001 |
| Immunity-related GTPase family M member 1 (Irgm1), mRNA                                     | NM_008326 | 1.21 | 1.39 | 2.49  | 0.001 |
| Immunity-related GTPase family M member 2 (Irgm2), mRNA                                     | NM_019440 | 1.5  | 2.4  | 4.46  | 0.001 |
| Inhibin beta-B subunit                                                                      | BB253137  | 1.62 | 1.77 | 4.35  | 0.001 |
| Inositol 1,4,5-trisphosphate 3-kinase B, mRNA (cDNA clone MGC:189961 IMAGE:9088148)         | BB434111  | 1.11 | 1.53 | 2.08  | 0.001 |
| Insulin-like growth factor 1                                                                | AF440694  | 1.15 | 1.28 | 2.78  | 0.001 |
| Insulin-like growth factor binding protein 4, mRNA (cDNA clone MGC:29917 IMAGE:5123738)     | NM_010517 | 1.08 | 1.16 | 2.71  | 0.001 |
| Insulin-like growth factor binding protein 5, mRNA (cDNA clone IMAGE:2650597)               | NM_010518 | 1.28 | 1.43 | 4.55  | 0.001 |

|                                                                                                       |           |      |      |       |       |
|-------------------------------------------------------------------------------------------------------|-----------|------|------|-------|-------|
| Integrin beta 2 (Itgb2), mRNA                                                                         | NM_008404 | 1.02 | 1.42 | 3.34  | 0.001 |
| Intercellular adhesion molecule 1 (Icam1), mRNA                                                       | BC008626  | 1.07 | 1.65 | 3.38  | 0.001 |
| Intercellular adhesion molecule 2, mRNA (cDNA clone MGC:11559 IMAGE:3962648)                          | NM_010494 | 1.29 | 1.74 | 2.2   | 0.001 |
| Interferon (alpha and beta) receptor 2, mRNA (cDNA clone IMAGE:3600669)                               | BB522265  | 1.11 | 1.61 | 2.71  | 0.001 |
| Interferon activated gene 203, mRNA (cDNA clone MGC:5842 IMAGE:3257492)                               | BC008167  | 1.02 | 1.48 | 4.98  | 0.001 |
| Interferon alpha 7 (Ifna7), mRNA                                                                      | NM_008334 | 1.3  | 1.48 | 2.19  | 0.002 |
| Interferon gamma induced GTPase (Igtg), mRNA                                                          | NM_018738 | 1.58 | 2.37 | 5.11  | 0.001 |
| Interferon gamma inducible protein 47, mRNA (cDNA clone MGC:11403 IMAGE:2651113)                      | NM_008330 | 1.23 | 1.89 | 4.78  | 0.001 |
| Interferon induced transmembrane protein 1 (Ifitm1), transcript variant 1, mRNA                       | BC027285  | 1.48 | 1.72 | 3.81  | 0.001 |
| Interferon induced transmembrane protein 3 (Ifitm3), mRNA                                             | BC010291  | 1.33 | 1.68 | 2.92  | 0.001 |
| Interferon induced transmembrane protein 6 (Ifitm6), mRNA                                             | BB193024  | 1.17 | 1.46 | 5.15  | 0.001 |
| Interferon stimulated gene 12 (Isg12)                                                                 | AY090098  | 1.05 | 1.48 | 2.84  | 0.001 |
| Interferon-gamma (MuIFN-gamma) mRNA sequence                                                          | K00083    | 1.98 | 3.79 | 16.07 | 0.002 |
| Interferon-induced protein with tetratricopeptide repeats 3, mRNA (cDNA clone MGC:6081 IMAGE:3487345) | NM_010501 | 1.22 | 1.67 | 2.33  | 0.001 |
| Interferon-inducible GTPase-like, mRNA (cDNA clone MGC:28308 IMAGE:4013233)                           | BM239828  | 1.84 | 4.3  | 11.41 | 0.001 |
| Interleukin 1 family, member 5 (delta) (Il1f5), transcript variant 2, mRNA                            | NM_019451 | 1.89 | 2.68 | 3.73  | 0.001 |
| Interleukin 1 receptor, type II, mRNA (cDNA clone MGC:41170 IMAGE:1282531)                            | NM_010555 | 1.97 | 2.2  | 5.6   | 0.001 |
| Interleukin 10-related T cell-derived inducible factor beta (Iltifb), mRNA                            | AJ249492  | 1.24 | 1.41 | 7.61  | 0.005 |
| Interleukin 11 (Il11), mRNA                                                                           | NM_008350 | 1.8  | 3.23 | 26.52 | 0.001 |

|                                                                                                                                |           |      |       |        |       |
|--------------------------------------------------------------------------------------------------------------------------------|-----------|------|-------|--------|-------|
| Interleukin 18 binding protein, mRNA (cDNA clone MGC:25760 IMAGE:4007411)                                                      | AF110803  | 1.23 | 1.52  | 3.92   | 0.001 |
| Interleukin 2 receptor, gamma chain, mRNA (cDNA clone MGC:25334 IMAGE:4924951)                                                 | L20048    | 1.02 | 1.18  | 2.31   | 0.001 |
| Interleukin 33 (Il33), mRNA                                                                                                    | NM_133775 | 1.17 | 1.9   | 7.32   | 0.001 |
| interleukin 4 receptor, alpha                                                                                                  | NM_010557 | 1.19 | 1.33  | 2.61   | 0.001 |
| Interleukin 6 (Il6), mRNA                                                                                                      | NM_031168 | 2.55 | 15.76 | 137.81 | 0.001 |
| Interleukin 6 signal transducer (Il6st), mRNA                                                                                  | AK017211  | 1.11 | 1.59  | 2.21   | 0.001 |
| Janus kinase 3 (Jak3), mRNA                                                                                                    | L40172    | 1.36 | 1.62  | 2.03   | 0.001 |
| Keratin 6A (Krt6a), mRNA                                                                                                       | NM_008476 | 1.19 | 1.29  | 4.23   | 0.007 |
| Killer cell lectin-like receptor subfamily B member 1B (Klrb1b), mRNA                                                          | AV294178  | 1.41 | 1.83  | 2.04   | 0.003 |
| Kinesin family member 2B, mRNA (cDNA clone MGC:169605 IMAGE:8861000)                                                           | AK006866  | 1.9  | 4.13  | 8.54   | 0.004 |
| Laminin, alpha 1 (Lama1), mRNA                                                                                                 | NM_008480 | 1.21 | 1.55  | 2.88   | 0.001 |
| Leucine-rich alpha-2-glycoprotein 1, mRNA (cDNA clone MGC:37928 IMAGE:5123909)                                                 | NM_029796 | 1.74 | 2.34  | 12.34  | 0.001 |
| Leucine-rich repeat LGI family, member 2 (Lgi2), mRNA                                                                          | BM118120  | 1.33 | 2.14  | 8.62   | 0.001 |
| Leukocyte immunoglobulin-like receptor, subfamily B (with TM and ITIM domains), member 3, mRNA (cDNA clone MGC:30225 IMAGE:44) | U96693    | 1.13 | 1.48  | 5      | 0.001 |
| Leukocyte immunoglobulin-like receptor, subfamily B, member 4, mRNA (cDNA clone MGC:6091 IMAGE:3585404)                        | U05264    | 1.22 | 1.9   | 6.12   | 0.001 |
| Leukocyte-associated immunoglobulin-like receptor (Lair)                                                                       | AV370380  | 1.02 | 2.12  | 2.79   | 0.001 |
| LIM and cysteine-rich domains 1 (Lmed1), mRNA                                                                                  | BC019124  | 1.1  | 1.21  | 2.66   | 0.002 |
| LIM domain containing 2, mRNA (cDNA clone MGC:92969 IMAGE:6413206)                                                             | AK012581  | 1.01 | 1.03  | 2.13   | 0.001 |
| LIM-domain containing, protein kinase (Limk1), mRNA                                                                            | NM_010717 | 1.17 | 1.28  | 2.03   | 0.001 |
| Lipoma HMGIC fusion partner, mRNA (cDNA clone                                                                                  | AV149705  | 1.12 | 1.6   | 2.01   | 0.001 |

|                                                                                               |           |      |      |       |       |
|-----------------------------------------------------------------------------------------------|-----------|------|------|-------|-------|
| MGC:106074 IMAGE:3154659)                                                                     |           |      |      |       |       |
| Lipopolysaccharide binding protein, mRNA (cDNA clone MGC:8118 IMAGE:3589072)                  | NM_008489 | 1.47 | 2.06 | 4.7   | 0.001 |
| LMIR5 mRNA for activating receptor                                                            | BB230267  | 1.14 | 1.35 | 2.57  | 0.001 |
| Lumican (Lum), mRNA                                                                           | AK014312  | 1.06 | 1.83 | 2.18  | 0.001 |
| Lymphatic vessel endothelial hyaluronan receptor 1, mRNA (cDNA clone MGC:48275 IMAGE:3372151) | AV124537  | 1.33 | 1.65 | 2     | 0.002 |
| Lymphocyte antigen 6 complex, locus A, mRNA (cDNA clone MGC:6188 IMAGE:3486025)               | BC002070  | 1.38 | 1.57 | 2.25  | 0.001 |
| Lymphocyte antigen 6 complex, locus C1, mRNA (cDNA clone MGC:18546 IMAGE:4221342)             | NM_010741 | 1.31 | 1.7  | 2.89  | 0.001 |
| Lymphocyte cytosolic protein 2, mRNA (cDNA clone MGC:11660 IMAGE:3603181)                     | BC006948  | 1.33 | 1.55 | 4.04  | 0.001 |
| Lysozyme 2, mRNA (cDNA clone IMAGE:2655292)                                                   | AV058500  | 1.08 | 1.7  | 3.1   | 0.001 |
| Macrophage galactose N-acetyl-galactosamine specific lectin 1 (Mgl1), mRNA                    | NM_010796 | 1.18 | 1.25 | 2.92  | 0.001 |
| Major facilitator superfamily domain containing 2 (Mfsd2), mRNA                               | AK006096  | 1.43 | 1.67 | 4.31  | 0.001 |
| Mannose receptor, C type 1 (Mrc1), mRNA                                                       | NM_008625 | 1.16 | 1.5  | 2.65  | 0.001 |
| Mannose receptor, C type 2 (Mrc2), mRNA                                                       | BB528408  | 1.1  | 1.51 | 2.1   | 0.001 |
| Masp3 mRNA for MBL-associated serine protease-3                                               | AB049755  | 1.4  | 1.62 | 2.7   | 0.001 |
| Matrix Gla protein, mRNA (cDNA clone MGC:46939 IMAGE:4990627)                                 | NM_008597 | 1.77 | 2.23 | 3.77  | 0.001 |
| Matrix metalloproteinase 10 (Mmp10), mRNA                                                     | NM_019471 | 1.97 | 4.79 | 38.24 | 0.001 |
| Matrix metalloproteinase 12, mRNA (cDNA clone MGC:29351 IMAGE:5037674)                        | BC019135  | 2.25 | 4.01 | 9.31  | 0.005 |
| Matrix metalloproteinase 2 (Mmp2), mRNA                                                       | NM_008610 | 1.21 | 1.74 | 2.02  | 0.001 |
| Matrix metalloproteinase 3, mRNA (cDNA clone MGC:11554 IMAGE:3962288)                         | NM_010809 | 2.02 | 6.04 | 39.89 | 0.001 |

|                                                                                                                                       |           |      |      |      |       |
|---------------------------------------------------------------------------------------------------------------------------------------|-----------|------|------|------|-------|
| Membrane-associated ring finger (C3HC4) 1, mRNA (cDNA clone MGC:86120 IMAGE:5703753)                                                  | BB134696  | 1.25 | 2.08 | 4.39 | 0.002 |
| Membrane-spanning 4-domains, subfamily A, member 6B, mRNA (cDNA clone MGC:35625 IMAGE:3984299)                                        | NM_027209 | 1.04 | 1.27 | 3.53 | 0.001 |
| Membrane-spanning 4-domains, subfamily A, member 6D, mRNA (cDNA clone MGC:25778 IMAGE:4016611)                                        | NM_026835 | 1.42 | 2    | 6.36 | 0.001 |
| metallothionein 1                                                                                                                     | BC027262  | 1.65 | 1.77 | 3.29 | 0.001 |
| Metallothionein 2, mRNA (cDNA clone MGC:19383 IMAGE:2651471)                                                                          | AA796766  | 1.33 | 1.76 | 2.27 | 0.001 |
| MFLJ00267 protein                                                                                                                     | BM244999  | 1.03 | 1.3  | 2.04 | 0.001 |
| MFLJ00359 protein                                                                                                                     | AV277444  | 1.33 | 2.5  | 5.24 | 0.001 |
| MFLJ00395 protein                                                                                                                     | AK021181  | 1.19 | 1.87 | 2.93 | 0.001 |
| Mitogen-activated protein kinase 8 interacting protein 2, mRNA (cDNA clone MGC:35849 IMAGE:5359447)                                   | AF220195  | 2.08 | 2.59 | 3.08 | 0.007 |
| MKIAA0084 protein                                                                                                                     | AK009372  | 1.12 | 1.51 | 2.15 | 0.001 |
| MKIAA1312 protein                                                                                                                     | BG141912  | 1.15 | 1.38 | 3.3  | 0.001 |
| MMAC8                                                                                                                                 | AI536469  | 1.11 | 1.45 | 2.36 | 0.001 |
| Moesin (Msn), mRNA                                                                                                                    | NM_010833 | 1.01 | 1.15 | 2.01 | 0.001 |
| Monocyte to macrophage differentiation-associated 2, mRNA (cDNA clone MGC:36872 IMAGE:4502289)                                        | BC025064  | 1.06 | 3.19 | 3.9  | 0.003 |
| MPS1 gene and mRNA, 3'end                                                                                                             | L20315    | 1.22 | 2.15 | 3.51 | 0.001 |
| MRNA similar to histocompatibility 2, D region locus 1 (cDNA clone MGC:25703 IMAGE:3675316)                                           | BC010602  | 1.06 | 1.33 | 2.52 | 0.001 |
| Mucosal vascular addressin cell adhesion molecule 1, mRNA (cDNA clone MGC:35998 IMAGE:4986802)                                        | BC024372  | 1.59 | 1.85 | 2.99 | 0.001 |
| Mus musculus 13 days embryo liver cDNA, RIKEN full-length enriched library, clone:2510001J03:Duffy blood group, full insert sequence. | AK010883  | 1.33 | 1.4  | 2.14 | 0.001 |
| Mus musculus ceruloplasmin (Cp), mRNA.                                                                                                | BB332449  | 1.67 | 2.96 | 8.25 | 0.001 |

|                                                                                                           |           |      |      |       |       |
|-----------------------------------------------------------------------------------------------------------|-----------|------|------|-------|-------|
| Mus musculus membrane-spanning 4-domains, subfamily A, member 9 (Ms4a9), mRNA.                            | NM_022429 | 1.33 | 1.67 | 7.42  | 0.001 |
| Mus musculus, Similar to phosphoserine aminotransferase, clone MGC:6462 IMAGE:2616298, mRNA, complete cds | AV216491  | 1.22 | 1.42 | 2.26  | 0.003 |
| Myosin VA (Myo5a), mRNA                                                                                   | NM_010864 | 1.08 | 1.76 | 2.25  | 0.002 |
| Myosin, light polypeptide 7, regulatory (Myl7), mRNA                                                      | NM_022879 | 1.48 | 1.5  | 4.62  | 0.001 |
| N-acetylneuraminase pyruvate lyase (Npl), mRNA                                                            | BC022734  | 1.27 | 2.15 | 5.29  | 0.001 |
| NAD+ ADP-ribosyltransferase 3 PARP-3                                                                      | BC014870  | 1.1  | 1.76 | 2.14  | 0.001 |
| neutrophil cytosolic factor 1                                                                             | AI844633  | 1.22 | 1.47 | 3.04  | 0.001 |
| Niacin receptor 1 (Niacr1), mRNA                                                                          | NM_030701 | 1.78 | 3.29 | 8.68  | 0.002 |
| NK13 (Serpib6b)                                                                                           | NM_011454 | 1.17 | 1.86 | 2.38  | 0.001 |
| NLR family, pyrin domain containing 3 (Nlrp3), mRNA                                                       | AF486632  | 1.01 | 1.17 | 3.49  | 0.001 |
| Nuclear receptor subfamily 2, group F, member 1 (Nr2f1), mRNA                                             | NM_010151 | 1.5  | 1.69 | 3.11  | 0.001 |
| Of protein S gene                                                                                         | Z25469    | 1.1  | 1.68 | 2.18  | 0.001 |
| Olfactomedin 1, mRNA (cDNA clone MGC:35933 IMAGE:5036675)                                                 | D78264    | 1.32 | 1.75 | 2.38  | 0.001 |
| Olfactomedin 3 (Olfm3), transcript variant A, mRNA                                                        | BB667895  | 3.19 | 7.96 | 14.09 | 0.004 |
| Olfactomedin-like 2B, mRNA (cDNA clone IMAGE:5353638)                                                     | BC025654  | 1.36 | 1.55 | 2.23  | 0.001 |
| Olfactomedin-like 3 (Olfml3), mRNA                                                                        | NM_133859 | 1.04 | 1.61 | 2.13  | 0.001 |
| Oncostatin M receptor (Osmr), mRNA                                                                        | AB015978  | 1.27 | 1.85 | 4.68  | 0.001 |
| Oncostatin M, mRNA (cDNA clone MGC:123464 IMAGE:40040107)                                                 | BB237825  | 1.32 | 1.34 | 2.72  | 0.002 |
| Paired-Ig-like receptor A1 (Pira1), mRNA                                                                  | NM_011087 | 1.13 | 1.86 | 4.63  | 0.001 |
| Peptidase inhibitor 15 (Pi15), mRNA                                                                       | BB216232  | 2.04 | 2.89 | 6.99  | 0.001 |
| Phosphatidylinositol 3-kinase catalytic delta polypeptide, mRNA (cDNA clone MGC:28528 IMAGE:4192906)      | NM_008840 | 1.2  | 1.43 | 3.42  | 0.001 |
| Phosphodiesterase 4B, cAMP specific, mRNA (cDNA clone IMAGE:5354427)                                      | BM246564  | 1    | 1.34 | 2.21  | 0.001 |



|                                                                                                                     |           |      |      |      |       |
|---------------------------------------------------------------------------------------------------------------------|-----------|------|------|------|-------|
| Phytanoyl-CoA hydroxylase interacting protein-like, mRNA (cDNA clone MGC:46972 IMAGE:5400532)                       | AI267048  | 1.79 | 2.86 | 3.32 | 0.001 |
| Pigeon homolog (Drosophila), mRNA (cDNA clone IMAGE:4506923)                                                        | BB820613  | 1.28 | 1.46 | 3.16 | 0.001 |
| Placental protein 11 related (Pp11r), mRNA                                                                          | AI528824  | 1.37 | 1.42 | 2.57 | 0.008 |
| Platelet-derived growth factor, C polypeptide, mRNA (cDNA clone MGC:46836 IMAGE:4008749)                            | NM_019971 | 1.3  | 1.8  | 2.06 | 0.001 |
| Pleckstrin (Plek), mRNA                                                                                             | AF181829  | 1.08 | 1.42 | 3.68 | 0.001 |
| Plexin C1 (Plxnc1), mRNA                                                                                            | BB476707  | 1.27 | 1.76 | 2.61 | 0.001 |
| Podoplanin, mRNA (cDNA clone MGC:36068 IMAGE:4985288)                                                               | NM_010329 | 1.22 | 1.81 | 3.33 | 0.001 |
| Poly (ADP-ribose) polymerase family, member 11 (Parp11), mRNA                                                       | BB028141  | 1.63 | 1.67 | 2.43 | 0.003 |
| Poly (ADP-ribose) polymerase family, member 14, mRNA (cDNA clone IMAGE:5065398)                                     | AK005563  | 1.39 | 1.52 | 2.35 | 0.002 |
| Polymeric immunoglobulin receptor 5 precursor (Pigr5)                                                               | AF251705  | 1.24 | 1.47 | 2.11 | 0.001 |
| Potassium channel tetramerisation domain containing 8, mRNA (cDNA clone MGC:151317 IMAGE:40126259)                  | BB183090  | 2.13 | 2.4  | 5.65 | 0.003 |
| Potassium inwardly-rectifying channel, subfamily J, member 8, mRNA (cDNA clone MGC:5890 IMAGE:3490123)              | NM_008428 | 1.19 | 1.44 | 3.07 | 0.001 |
| Potassium voltage-gated channel, Isk-related subfamily, gene 4, mRNA (cDNA clone IMAGE:3470905)                     | NM_021342 | 1.05 | 1.79 | 3.38 | 0.001 |
| Potassium voltage-gated channel, shaker-related subfamily, beta member 2, mRNA (cDNA clone MGC:25329 IMAGE:4503373) | U31908    | 1.43 | 1.59 | 2.21 | 0.001 |
| Predicted gene, EG622976, mRNA (cDNA clone MGC:182598 IMAGE:9056492)                                                | BB548587  | 1.27 | 1.66 | 5.15 | 0.006 |
| PREDICTED: Mus musculus hypothetical protein LOC100042464 (LOC100042464), mRNA                                      | BM220421  | 1.27 | 1.91 | 2.8  | 0.001 |
| PREDICTED: Mus musculus pappalysin 2 (Pappa2), mRNA                                                                 | BB101283  | 1.65 | 1.75 | 2.38 | 0.001 |
| PREDICTED: Mus musculus RIKEN cDNA 1810013A23 gene                                                                  | AV050195  | 2.43 | 3.55 | 4.56 | 0.001 |

|                                                                                                                                |           |      |      |       |       |
|--------------------------------------------------------------------------------------------------------------------------------|-----------|------|------|-------|-------|
| (1810013A23Rik), mRNA                                                                                                          |           |      |      |       |       |
| PREDICTED: Mus musculus syntaxin 11 (Stx11), mRNA                                                                              | AK017897  | 1.13 | 1.71 | 3.01  | 0.001 |
| PREDICTED: Mus musculus vestigial like 3 (Drosophila) (Vgll3), mRNA                                                            | BG066866  | 1.2  | 1.76 | 2.01  | 0.001 |
| Preprolegumain                                                                                                                 | NM_011175 | 1.2  | 1.56 | 2.48  | 0.001 |
| Procollagen C-endopeptidase enhancer protein (Pcolce), mRNA                                                                    | BB250811  | 1.04 | 1.71 | 2.14  | 0.001 |
| Procollagen lysine, 2-oxoglutarate 5-dioxygenase 2, mRNA (cDNA clone MGC:29312 IMAGE:5007509)                                  | BC021352  | 1.18 | 1.5  | 2.05  | 0.001 |
| Proprotein convertase subtilisin/kexin type 5, mRNA (cDNA clone IMAGE:4036159)                                                 | BC013068  | 1.21 | 1.25 | 2.01  | 0.006 |
| Prostacyclin receptor                                                                                                          | AV373771  | 1.3  | 1.66 | 2.42  | 0.001 |
| Protease, serine 27, mRNA (cDNA clone MGC:151388 IMAGE:40126330)                                                               | BB115142  | 1.24 | 1.33 | 5.11  | 0.001 |
| Proteasome (prosome, macropain) subunit, beta type 8 (large multifunctional peptidase 7), mRNA (cDNA clone MGC:6535 IMAGE:265) | NM_010724 | 1.12 | 1.5  | 2.62  | 0.001 |
| Proteasome (prosome, macropain) subunit, beta type 9 (large multifunctional peptidase 2) (Psm9), mRNA                          | AW048052  | 1.26 | 2.04 | 4.14  | 0.001 |
| Proteinase 3 (Prtn3), mRNA                                                                                                     | U97073    | 1.26 | 3.07 | 4.94  | 0.004 |
| Proteoglycan 4 (megakaryocyte stimulating factor, articular superficial zone protein) (Prg4), transcript variant 1, mRNA       | NM_021400 | 1.64 | 2.47 | 10.12 | 0.002 |
| Protocadherin 7 (Pcdh7), transcript variant 2, mRNA                                                                            | NM_018764 | 1.1  | 1.73 | 2.23  | 0.001 |
| Protocadherin beta 12 (Pcdhb12), mRNA                                                                                          | NM_053137 | 1.52 | 2.07 | 2.17  | 0.002 |
| Protocadherin beta 9 (Pcdhb9), mRNA                                                                                            | NM_053134 | 1.53 | 2.12 | 2.65  | 0.001 |
| Purinergic receptor P2Y, G-protein coupled 13, mRNA (cDNA clone MGC:155359 IMAGE:8733792)                                      | AK008013  | 1.39 | 1.74 | 2.23  | 0.001 |
| Putative secreted metalloprotease ADAMTS5 (Adamts5)                                                                            | BB475194  | 1.02 | 1.5  | 2.02  | 0.001 |
| Pyrin and HIN domain family, member 1, mRNA (cDNA clone MGC:130358 IMAGE:40056703)                                             | BM241008  | 1.03 | 1.24 | 4.43  | 0.001 |

|                                                                                            |           |      |      |       |       |
|--------------------------------------------------------------------------------------------|-----------|------|------|-------|-------|
| Quaking (Qk), mRNA                                                                         | NM_021881 | 1.2  | 1.59 | 2.02  | 0.001 |
| RAB3A interacting protein (rabin3)-like 1 (Rab3il1), mRNA                                  | AK004767  | 1.2  | 2.1  | 2.75  | 0.001 |
| RANKL 1                                                                                    | NM_011613 | 1.06 | 1.84 | 8.75  | 0.004 |
| Ras association (RalGDS/AF-6) domain family member 5 (Rassf5), mRNA                        | NM_018750 | 1.11 | 1.51 | 2.27  | 0.001 |
| RAS guanyl releasing protein 1 (Rasgrp1), mRNA                                             | BE691356  | 1.05 | 1.78 | 2.25  | 0.001 |
| RAS-like, family 11, member A (Rasl11a), mRNA                                              | AK004371  | 1.46 | 2.24 | 5.32  | 0.001 |
| Receptor transporter protein 4, mRNA (cDNA clone MGC:28210 IMAGE:3990099)                  | BC024872  | 1.15 | 1.22 | 2.4   | 0.001 |
| Regenerating islet-derived 3 beta, mRNA (cDNA clone MGC:41159 IMAGE:3471932)               | NM_011036 | 2.69 | 3.88 | 9.19  | 0.001 |
| Regenerating islet-derived 3 gamma (Reg3g), mRNA                                           | NM_011260 | 3.08 | 3.14 | 21.81 | 0.001 |
| Regulator of G-protein signaling 16, mRNA (cDNA clone MGC:13876 IMAGE:4020813)             | BB100249  | 1.63 | 1.7  | 2.87  | 0.005 |
| Renin binding protein, mRNA (cDNA clone MGC:25952 IMAGE:4238244)                           | NM_023132 | 1.9  | 2.28 | 3.03  | 0.001 |
| Reticulocalbin 1 (Rcn1), mRNA                                                              | NM_009037 | 1.2  | 1.63 | 2.21  | 0.001 |
| Retinol binding protein 1, cellular, mRNA (cDNA clone MGC:6258 IMAGE:3498107)              | NM_011254 | 1.25 | 1.69 | 3.22  | 0.001 |
| Rho GTPase activating protein 9 (Arhgap9), mRNA                                            | BB327418  | 1.33 | 1.54 | 3.06  | 0.001 |
| Rho guanine nucleotide exchange factor (GEF) 4, mRNA (cDNA clone MGC:170998 IMAGE:8862393) | AV024939  | 1.37 | 2.15 | 2.23  | 0.001 |
| RIKEN cDNA 0610025L06 gene                                                                 | AV010467  | 1.15 | 1.61 | 2.55  | 0.001 |
| RIKEN cDNA 0610037M15 gene                                                                 | BG916808  | 1.25 | 1.92 | 3.01  | 0.001 |
| RIKEN cDNA 1200002N14 gene (1200002N14Rik), mRNA                                           | BC021433  | 1.09 | 1.46 | 2.69  | 0.001 |
| RIKEN cDNA 1200015M12 gene                                                                 | C85657    | 1.01 | 1.12 | 2.45  | 0.001 |
| RIKEN cDNA 1700019O17 gene, mRNA (cDNA clone MGC:175640 IMAGE:40131056)                    | AK006136  | 1.71 | 3.55 | 4.6   | 0.004 |
| RIKEN cDNA 2010002N04 gene (2010002N04Rik), mRNA                                           | BI963682  | 1.23 | 1.26 | 2.93  | 0.001 |

|                                                                                            |           |      |      |       |       |
|--------------------------------------------------------------------------------------------|-----------|------|------|-------|-------|
| RIKEN cDNA 2310002J15 gene (2310002J15Rik), mRNA                                           | NM_026415 | 1.64 | 2.92 | 4.94  | 0.006 |
| RIKEN cDNA 2900062L11 gene, mRNA (cDNA clone IMAGE:5365902)                                | AK013740  | 1.12 | 1.35 | 2.72  | 0.001 |
| RIKEN cDNA 4930503L19 gene, mRNA (cDNA clone IMAGE:4505701)                                | AI450962  | 1.19 | 1.74 | 2.02  | 0.005 |
| RIKEN cDNA 4933412E12 gene                                                                 | BB265147  | 1.72 | 2.82 | 3.08  | 0.005 |
| RIKEN cDNA 5830400J07 gene                                                                 | AI785192  | 1.31 | 1.79 | 2.55  | 0.002 |
| RIKEN cDNA 6330406I15 gene, mRNA (cDNA clone IMAGE:4946298)                                | AK018128  | 1.01 | 1.28 | 3.24  | 0.001 |
| RIKEN cDNA 9230105E10 gene, mRNA (cDNA clone MGC:46806 IMAGE:2648191)                      | BB271468  | 1.33 | 1.72 | 2.32  | 0.001 |
| RIKEN cDNA 9930013L23 gene (9930013L23Rik), mRNA                                           | AK018112  | 2    | 5.01 | 32    | 0.001 |
| RIKEN cDNA A030005L19 gene                                                                 | NM_030006 | 3.4  | 3.94 | 4.85  | 0.001 |
| RIKEN cDNA D530015H24 gene                                                                 | AK021289  | 1.93 | 1.99 | 7.58  | 0.001 |
| R-spondin 3 homolog ( <i>Xenopus laevis</i> ), mRNA (cDNA clone MGC:175818 IMAGE:40131234) | BG072958  | 1.4  | 2.26 | 3.28  | 0.001 |
| R-spondin homolog ( <i>Xenopus laevis</i> ) (Rspo1), mRNA                                  | NM_138683 | 2.13 | 4.17 | 5.13  | 0.001 |
| S100 calcium binding protein A8 (calgranulin A) (S100a8), mRNA                             | NM_013650 | 1.45 | 1.84 | 36.68 | 0.001 |
| S100 calcium binding protein A9 (calgranulin B), mRNA (cDNA clone MGC:41215 IMAGE:1332797) | NM_009114 | 1.06 | 2.53 | 59.95 | 0.001 |
| SAM domain, SH3 domain and nuclear localization signals, 1 (Samsn1), mRNA                  | NM_023380 | 1.07 | 1.58 | 3.02  | 0.001 |
| Scavenger receptor class A, member 3, mRNA (cDNA clone IMAGE:4167495)                      | BC026446  | 1.2  | 1.97 | 2.78  | 0.001 |
| Schlafen 1 (Slfn1), mRNA                                                                   | NM_011407 | 2.03 | 6.33 | 42.52 | 0.001 |
| Schlafen 8, mRNA (cDNA clone IMAGE:3982223)                                                | BC024709  | 1.75 | 2.57 | 6.14  | 0.001 |
| Sclerostin domain containing 1, mRNA (cDNA clone MGC:29422 IMAGE:5064413)                  | BC021458  | 1.17 | 1.82 | 2.65  | 0.001 |

|                                                                                                                    |           |      |      |       |       |
|--------------------------------------------------------------------------------------------------------------------|-----------|------|------|-------|-------|
| Secreted frizzled-related protein 4, mRNA (cDNA clone MGC:41113 IMAGE:1364770)                                     | BB221995  | 1.24 | 1.42 | 2.15  | 0.001 |
| Secreted frizzled-related sequence protein 5, mRNA (cDNA clone MGC:41101 IMAGE:1395864)                            | NM_018780 | 1.46 | 2.41 | 3.13  | 0.004 |
| Secretory leukocyte peptidase inhibitor, mRNA (cDNA clone MGC:41142 IMAGE:1513866)                                 | NM_011414 | 1.28 | 1.7  | 4.34  | 0.001 |
| Selectin, lymphocyte (Sell), mRNA                                                                                  | M36005    | 1.1  | 1.41 | 5.12  | 0.001 |
| Selectin, platelet (p-selectin) ligand, mRNA (cDNA clone MGC:6637 IMAGE:3495181)                                   | NM_009151 | 1.07 | 1.28 | 2.52  | 0.001 |
| Selectin, platelet (Selp), mRNA                                                                                    | M72332    | 1.68 | 2.68 | 9.64  | 0.001 |
| Serine (or cysteine) peptidase inhibitor, clade A, member 3G, mRNA (cDNA clone IMAGE:3484201)                      | BC002065  | 1.3  | 1.89 | 6.93  | 0.001 |
| Serine (or cysteine) peptidase inhibitor, clade B (ovalbumin), member 11, mRNA (cDNA clone MGC:6485 IMAGE:2646766) | NM_025867 | 1.1  | 1.43 | 2.14  | 0.008 |
| Serine (or cysteine) peptidase inhibitor, clade B, member 9, mRNA (cDNA clone MGC:36172 IMAGE:4925100)             | NM_009256 | 1.37 | 1.96 | 2.57  | 0.001 |
| Serine (or cysteine) peptidase inhibitor, clade E, member 2, mRNA (cDNA clone MGC:11797 IMAGE:3595407)             | NM_009255 | 1.21 | 1.75 | 2.99  | 0.001 |
| Serum amyloid A 3 (Saa3), mRNA                                                                                     | NM_011315 | 1.39 | 3.83 | 33.43 | 0.001 |
| SH3 and PX domains 2B, mRNA (cDNA clone MGC:176267 IMAGE:9055918)                                                  | BM234433  | 1.04 | 1.14 | 2.68  | 0.001 |
| Sideroflexin 4 (Sfxn4), mRNA                                                                                       | NM_053198 | 1.49 | 1.49 | 2.03  | 0.004 |
| Signal transducer and activator of transcription 1, mRNA (cDNA clone MGC:6411 IMAGE:3587831)                       | AW214029  | 1.2  | 1.34 | 2.86  | 0.001 |
| Signal-regulatory protein alpha, mRNA (cDNA clone IMAGE:5035438)                                                   | AB018194  | 1.16 | 1.56 | 2.49  | 0.001 |
| Signal-regulatory protein beta 1 (Sirpb1), transcript variant 3, mRNA                                              | AI662854  | 1.96 | 2.85 | 18.41 | 0.001 |
| Similar to hypothetical protein MGC37588, mRNA (cDNA clone MGC:28125 IMAGE:3980327)                                | AV286265  | 1.22 | 1.33 | 2.43  | 0.001 |

|                                                                                               |           |      |      |      |       |
|-----------------------------------------------------------------------------------------------|-----------|------|------|------|-------|
| Simple repetitive DNA (sqr family) transcript (clone pmlc 2) with conserved GACA/GATA repeats | BG067912  | 1.19 | 1.42 | 2.02 | 0.001 |
| Single-stranded DNA binding protein 2 (Ssbp2), transcript variant 2, mRNA                     | AK005150  | 1.19 | 2.06 | 2.1  | 0.001 |
| SLAM family member 8, mRNA (cDNA clone MGC:37716 IMAGE:5066283)                               | BC024587  | 2    | 2.64 | 5.64 | 0.001 |
| SLIT1 protein (Slit1)                                                                         | BM570006  | 1.21 | 1.51 | 3.61 | 0.001 |
| Solute carrier family 10 (sodium/bile acid cotransporter family), member 6 (Slc10a6), mRNA    | AV244484  | 1.02 | 1.23 | 2.84 | 0.001 |
| Solute carrier family 15, member 3 (Slc15a3), mRNA                                            | NM_023044 | 1.39 | 2.07 | 6.26 | 0.001 |
| Solute carrier family 16 (monocarboxylic acid transporters), member 2 (Slc16a2), mRNA         | AW105741  | 1.46 | 1.8  | 2.21 | 0.001 |
| Solute carrier family 5 (sodium/glucose cotransporter), member 9 (Slc5a9), mRNA               | BB003029  | 1.13 | 2.27 | 2.86 | 0.001 |
| Sphingosine kinase 1, mRNA (cDNA clone MGC:47288 IMAGE:4221357)                               | AF068749  | 1.22 | 1.45 | 3.44 | 0.001 |
| Sphingosine-1-phosphate receptor 3 (S1pr3), mRNA                                              | BB532532  | 1.02 | 1.44 | 2.09 | 0.001 |
| Spondin 1, (f-spondin) extracellular matrix protein (Spon1), mRNA                             | BC020531  | 1.26 | 1.69 | 2.97 | 0.001 |
| SRY-box containing gene 17 (Sox17), mRNA                                                      | AK004781  | 1.7  | 2.86 | 2.95 | 0.001 |
| SRY-box containing gene 7 (Sox7), mRNA                                                        | NM_011446 | 1.68 | 2.54 | 3.03 | 0.001 |
| ST8 alpha-N-acetyl-neuraminide alpha-2,8-sialyltransferase 4 (St8sia4), mRNA                  | NM_009183 | 1.11 | 1.86 | 2.01 | 0.001 |
| Stabilin 1, mRNA (cDNA clone IMAGE:4983573)                                                   | NM_138672 | 1.21 | 1.65 | 2.15 | 0.001 |
| Strain 129/SvJ NK cell inhibitory receptor (Klra2)                                            | NM_008462 | 1.38 | 2.01 | 4.61 | 0.001 |
| Strain DBA/2J integrin alpha L (Itgal)                                                        | BI554446  | 1.16 | 1.55 | 2.91 | 0.001 |
| Strain ILS interleukin 3 receptor-like protein                                                | NM_007780 | 1.91 | 2.71 | 6.6  | 0.001 |
| Strain NOD/LtJ small inducible cytokine A2 precursor (Scya2)                                  | AF065933  | 1.07 | 1.78 | 7.72 | 0.001 |
| Sulfatase 1, mRNA (cDNA clone MGC:25096)                                                      | BB065799  | 1.09 | 1.85 | 2.66 | 0.001 |

|                                                                                   |           |            |            |       |       |
|-----------------------------------------------------------------------------------|-----------|------------|------------|-------|-------|
| IMAGE:4500954)                                                                    |           |            |            |       |       |
| Sulfatase 2 (Sulf2), mRNA                                                         | AK008108  | 1.18       | 1.47       | 2.29  | 0.001 |
| Superoxide dismutase 3, extracellular, mRNA (cDNA clone MGC:13799 IMAGE:3983917)  | NM_011435 | 1.11       | 1.34       | 2.18  | 0.001 |
| Suppressor of cytokine signaling 3 (Socs3), mRNA                                  | NM_007707 | 1.56       | 2          | 6.89  | 0.001 |
| Surfeit gene 6, mRNA (cDNA clone MGC:46946 IMAGE:4952465)                         | BB530856  | 1.01       | 2.63       | 4.63  | 0.001 |
| SV-40 induced 24p3 mRNA                                                           | X14607    | 2.68       | 3.12       | 16.34 | 0.001 |
| T-box 1 (Tbx1), mRNA                                                              | AF326960  | 1.12       | 1.89       | 2.15  | 0.004 |
| T-cell acute lymphocytic leukemia 1 (Tall), mRNA                                  | NM_011527 | 1.54       | 1.71       | 2.27  | 0.001 |
| T-cell specific GTPase, mRNA (cDNA clone MGC:18429 IMAGE:3662733)                 | NM_011579 | 1.56       | 3.71       | 8.61  | 0.001 |
| Tetraspanin 4 (Tspan4), mRNA                                                      | NM_053082 | 1.94       | 2.36       | 4.14  | 0.001 |
| Thymus cell antigen 1, theta (Thy1), mRNA                                         | AV028402  | 1.16       | 1.78       | 2.32  | 0.001 |
| Tissue inhibitor of metalloproteinase 1, mRNA (cDNA clone MGC:6151 IMAGE:3158222) | BC008107  | 1.4        | 1.91       | 7.89  | 0.001 |
| Tolloid-like (Tll1), mRNA                                                         | NM_009390 | 1.6        | 2.07       | 2.5   | 0.002 |
| Trans-acting transcription factor 6 (Sp6), mRNA                                   | BB473680  | 2.71       | 3.53       | 4.77  | 0.007 |
| Transcribed locus                                                                 | BM508445  | 2.67       | 3.77       | 5.16  | 0.001 |
| Transcribed locus                                                                 | AI120070  | 1.1        | 1.3        | 2.12  | 0.001 |
| Transcribed locus                                                                 | AA223007  | 1.73       | 2.35       | 2.35  | 0.002 |
| Transcribed locus                                                                 | AU067682  | 1.41       | 2.16       | 3.12  | 0.001 |
| Transcribed locus                                                                 | BB829808  | 4.27       | 6.61       | 61.48 | 0.001 |
| Transcribed locus                                                                 | AW543723  | 1.17       | 1.34       | 2.2   | 0.001 |
| Transcribed locus                                                                 | BF319510  | 1.99       | 3.64       | 5.31  | 0.006 |
| Transcribed locus                                                                 | AW493579  | 3.26       | 3.81       | 3.93  | 0.006 |
| Transcribed locus                                                                 | AW215795  | 1.63       | 2.53       | 3.88  | 0.001 |
| Transcribed locus                                                                 | AW045947  | 1.24       | 1.63       | 2.16  | 0.001 |
| Transcribed locus                                                                 | BG791642  | 1.24±0.002 | 1.53±0.002 | 2.72  | 0.001 |

|                                                                                                                               |          |      |      |      |       |
|-------------------------------------------------------------------------------------------------------------------------------|----------|------|------|------|-------|
| Transcribed locus                                                                                                             | BB097063 | 1.89 | 2.76 | 2.78 | 0.001 |
| Transcribed locus                                                                                                             | BB200474 | 1.76 | 1.97 | 3.25 | 0.006 |
| Transcribed locus                                                                                                             | BB229853 | 1.55 | 2.16 | 2.98 | 0.001 |
| Transcribed locus                                                                                                             | BB360644 | 1.43 | 1.59 | 2.76 | 0.005 |
| Transcribed locus                                                                                                             | BB549310 | 1.47 | 1.84 | 2.35 | 0.001 |
| Transcribed locus                                                                                                             | BG073335 | 1.13 | 1.63 | 2.15 | 0.001 |
| Transcribed locus                                                                                                             | BB148843 | 1.21 | 1.81 | 2.25 | 0.001 |
| Transcribed locus                                                                                                             | BM120676 | 2.42 | 2.88 | 5.15 | 0.001 |
| Transcribed locus                                                                                                             | BM220110 | 1.54 | 1.86 | 2.37 | 0.001 |
| Transcribed locus                                                                                                             | BB631473 | 1.23 | 1.53 | 2.34 | 0.001 |
| Transcribed locus                                                                                                             | BM119198 | 1.27 | 1.57 | 2.06 | 0.001 |
| Transcribed locus                                                                                                             | BB363812 | 1.28 | 1.94 | 2.78 | 0.001 |
| Transcribed locus                                                                                                             | BM124348 | 1.65 | 2    | 2.48 | 0.001 |
| Transcribed locus                                                                                                             | BB419140 | 1.22 | 1.51 | 2.05 | 0.001 |
| Transcribed locus                                                                                                             | AW111920 | 1.45 | 1.91 | 5.35 | 0.001 |
| Transcribed locus                                                                                                             | BB540658 | 1.07 | 1.5  | 2.2  | 0.001 |
| Transcribed locus                                                                                                             | AV229522 | 1.28 | 1.5  | 4.17 | 0.001 |
| Transcribed locus                                                                                                             | BF225802 | 1.22 | 1.89 | 3.95 | 0.001 |
| Transcribed locus                                                                                                             | BB278264 | 1.41 | 5.07 | 5.44 | 0.003 |
| Transcribed locus                                                                                                             | BE992565 | 1.01 | 1.21 | 2.74 | 0.001 |
| Transcribed locus, strongly similar to NP_852028.1 nudix (nucleoside diphosphate linked moiety X)-type motif 6 [Rattus norveg | BB043522 | 1.04 | 1.6  | 2.68 | 0.001 |
| Transcribed locus, strongly similar to XP_001473809.1 PREDICTED: similar to 4933409K07Rik protein [Mus musculus]              | BB379724 | 1.54 | 2.03 | 2.63 | 0.005 |
| Transcribed locus, strongly similar to XP_001473809.1 PREDICTED: similar to 4933409K07Rik protein [Mus musculus]              | AV279792 | 1.58 | 1.89 | 2.33 | 0.001 |



|                                                                                                                           |           |      |      |      |       |
|---------------------------------------------------------------------------------------------------------------------------|-----------|------|------|------|-------|
| Transcribed locus, strongly similar to XP_001479680.1<br>PREDICTED: similar to Murine coagulation factor V [Mus musculus] | BB224329  | 3.68 | 4.83 | 38.1 | 0.001 |
| transforming growth factor, beta induced, 68 kDa                                                                          | BB533460  | 1.13 | 1.51 | 2.03 | 0.001 |
| Transglutaminase 1, K polypeptide, mRNA (cDNA clone MGC:31305 IMAGE:4221991)                                              | BC026422  | 1.1  | 1.44 | 3.17 | 0.001 |
| transglutaminase 2, C polypeptide                                                                                         | BB041811  | 1.14 | 1.53 | 2.52 | 0.001 |
| Transmembrane 6 superfamily member 1 (Tm6sf1), mRNA                                                                       | AV378394  | 1.08 | 1.38 | 2.05 | 0.001 |
| Transmembrane channel-like protein 1 (Tmcl)                                                                               | NM_028953 | 1.05 | 4.07 | 4.99 | 0.006 |
| Transmembrane protein 173, mRNA (cDNA clone IMAGE:5343545)                                                                | AK012006  | 1.36 | 1.44 | 3.51 | 0.001 |
| Transmembrane protein 176A (Tmem176a), transcript variant 1, mRNA                                                         | BC006049  | 1.15 | 1.52 | 2.06 | 0.001 |
| Trichorhinophalangeal syndrome I (human), mRNA (cDNA clone MGC:46754 IMAGE:4951294)                                       | NM_032000 | 1.43 | 1.73 | 2.36 | 0.004 |
| Tripartite motif-containing 12 (Trim12), mRNA                                                                             | BM244351  | 1.27 | 1.54 | 2.24 | 0.001 |
| Tripartite motif-containing 30, mRNA (cDNA clone MGC:6159 IMAGE:3493256)                                                  | BM240719  | 1.07 | 1.34 | 2.62 | 0.001 |
| Tripartite motif-containing 40, mRNA (cDNA clone MGC:198742 IMAGE:9054323)                                                | BB082291  | 1.03 | 1.22 | 3.15 | 0.001 |
| TRNA phosphotransferase 1 (Trpt1), transcript variant 1, mRNA                                                             | BB113173  | 1.07 | 1.23 | 2.09 | 0.001 |
| Tubulin, beta 6, mRNA (cDNA clone MGC:6469 IMAGE:2631779)                                                                 | NM_026473 | 1.27 | 1.59 | 2.27 | 0.001 |
| Tumor necrosis factor alpha induced protein 6, mRNA (cDNA clone MGC:13914 IMAGE:4208738)                                  | NM_009398 | 1.32 | 1.8  | 3.88 | 0.001 |
| Tumor necrosis factor receptor superfamily, member 11b (osteoprotegerin) (Tnfrsf11b), mRNA                                | AB013898  | 1.75 | 1.98 | 3.06 | 0.001 |
| Tumor necrosis factor receptor superfamily, member 9, mRNA (cDNA clone MGC:41133 IMAGE:1497753)                           | BM250782  | 1.48 | 1.53 | 4.57 | 0.008 |
| tumor necrosis factor, alpha-induced protein 2                                                                            | BB233088  | 1.09 | 1.95 | 5.43 | 0.001 |

|                                                                                 |           |      |      |      |       |
|---------------------------------------------------------------------------------|-----------|------|------|------|-------|
| Tumor necrosis factor, alpha-induced protein 2, mRNA (cDNA clone IMAGE:3709243) | NM_009396 | 1.11 | 1.45 | 3.07 | 0.001 |
| Twist homolog 1 (Drosophila), mRNA (cDNA clone MGC:36030 IMAGE:4935230)         | NM_011658 | 1.27 | 1.81 | 2.23 | 0.001 |
| TYRO protein tyrosine kinase binding protein (Tyrobp), mRNA                     | NM_011662 | 1.23 | 1.53 | 3.59 | 0.001 |
| Vascular cell adhesion molecule 1, mRNA (cDNA clone MGC:36028 IMAGE:4196681)    | L08431    | 1.12 | 1.38 | 2.6  | 0.001 |
| Vomer nasal 2, receptor 1 (Vmn2r1), mRNA                                        | NM_019918 | 2.2  | 2.33 | 2.63 | 0.006 |
| WAP four-disulfide core domain 12, mRNA (cDNA clone MGC:32134 IMAGE:4923469)    | NM_138684 | 1.03 | 2.13 | 13.8 | 0.001 |
| WD repeat and FYVE domain containing 4 (Wdfy4), mRNA                            | BM222853  | 1.08 | 1.93 | 2.1  | 0.001 |
| Wilms tumor 1 homolog (Wt1), mRNA                                               | M55512    | 1.32 | 1.78 | 2.52 | 0.007 |
| Wiskott-Aldrich syndrome protein (WASP)                                         | NM_009515 | 1.48 | 1.68 | 3.73 | 0.003 |
| WNT1 inducible signaling pathway protein 1 (Wisp1), mRNA                        | NM_018865 | 1.09 | 1.41 | 2.3  | 0.001 |
