# Supplementary material
Source: PubMed Central journal article supplement (PMC3026350)
Supplement: tableS2.pdf [file tableS2.pdf]

**Table B: D0>D2>D4<D6**

| Gene Title                                                                                                          | Gene Identifier | D2/D0 | D4/D0 | D6/D0 | P     |
|---------------------------------------------------------------------------------------------------------------------|-----------------|-------|-------|-------|-------|
| 11-zinc-finger transcription factor (CTCF)                                                                          | BB836888        | -1.35 | -2.08 | -1.85 | 0.001 |
| 24-dehydrocholesterol reductase, mRNA (cDNA clone MGC:30547 IMAGE:5054108)                                          | BG295389        | -1.37 | -5    | -3.13 | 0.002 |
| 2'-5' oligoadenylate synthetase 3 (Oas3), mRNA                                                                      | AB067534        | -1.01 | -2.22 | 2.37  | 0.004 |
| 5'-3' exoribonuclease 1 (Xrn1), mRNA                                                                                | NM_011916       | -2    | -2.7  | -2.56 | 0.001 |
| Abnormal spindle (Asp)                                                                                              | BB648052        | -1.82 | -3.7  | -1.89 | 0.003 |
| ADAMTS-like 1, mRNA (cDNA clone IMAGE:8862361)                                                                      | AK020115        | -1.89 | -2.04 | 3.66  | 0.001 |
| Adenomatous polyposis coli (Apc), mRNA                                                                              | NM_007462       | -1.39 | -3.13 | -2.86 | 0.001 |
| ADP-ribosylation factor-like 5B (Arl5b), mRNA                                                                       | BB545273        | -1.64 | -2.7  | -1.89 | 0.001 |
| Adrenocortical dysplasia, mRNA (cDNA clone IMAGE:3500864)                                                           | BE996461        | -1.05 | -2.08 | -1.49 | 0.001 |
| Alpha thalassemia/mental retardation syndrome X-linked homolog (human) (Atrx), mRNA                                 | BB825830        | -1.69 | -4.35 | -2.56 | 0.004 |
| Amphiregulin, mRNA (cDNA clone MGC:11536 IMAGE:3597695)                                                             | NM_009704       | -1.72 | -2.86 | -1.49 | 0.008 |
| Amplified in osteosarcoma, mRNA (cDNA clone MGC:25481 IMAGE:4487829)                                                | BG067859        | -1.02 | -2.04 | -1.79 | 0.001 |
| Amyotrophic lateral sclerosis 2 (juvenile) chromosome region, candidate 19 (human), mRNA (cDNA clone IMAGE:3589573) | AK008055        | -1.64 | -2.33 | -1.96 | 0.003 |
| Ankyrin repeat domain 11, mRNA (cDNA clone MGC:198846 IMAGE:9054811)                                                | BB320513        | -2.17 | -5.26 | -4.17 | 0.001 |
| Antigen containing epitope to monoclonal antibody MMS-85/12                                                         | BB542960        | -2.17 | -4.76 | -4.35 | 0.004 |
| Antizyme inhibitor 1, mRNA (cDNA clone MGC:30222 IMAGE:5151406)                                                     | BI155585        | -1.47 | -3.13 | -2.13 | 0.001 |
| AP2 associated kinase 1, mRNA (cDNA clone IMAGE:5367262)                                                            | C79663          | -1.12 | -2    | -1.85 | 0.001 |
| Aquaporin 2, mRNA (cDNA clone MGC:28947 IMAGE:4222942)                                                              | BC019966        | -1.18 | -1.3  | 2.51  | 0.007 |
| ArfGAP with RhoGAP domain, ankyrin repeat and PH domain 2, mRNA (cDNA clone IMAGE:3710592)                          | BB182934        | -1.25 | -2.13 | -1.64 | 0.003 |
| Arylacetamide deacetylase-like 1, mRNA (cDNA clone MGC:105251)                                                      | AV369935        | -1.27 | -2.7  | -2.44 | 0.001 |

|                                                                                                               |           |       |       |       |       |
|---------------------------------------------------------------------------------------------------------------|-----------|-------|-------|-------|-------|
| IMAGE:30550100)                                                                                               |           |       |       |       |       |
| Ash1 (absent, small, or homeotic)-like (Drosophila) (Ash1), mRNA                                              | BG694892  | -1.43 | -2.27 | -1.85 | 0.007 |
| Ataxin 1 (Atxn1), mRNA                                                                                        | BG067317  | -1.41 | -2.22 | -2.17 | 0.001 |
| ATPase family, AAA domain containing 1                                                                        | BB292625  | -1.92 | -3.45 | -3.33 | 0.001 |
| ATPase, aminophospholipid transporter (APLT), class I, type 8A, member 1 (Atp8a1), transcript variant 2, mRNA | BB303874  | -1.56 | -2.44 | -2.08 | 0.001 |
| Axon guidance signal SEMA6A1                                                                                  | AF288666  | -2.5  | -6.25 | -5    | 0.001 |
| Basic leucine zipper and W2 domains 2, mRNA (cDNA clone MGC:7203 IMAGE:3482251)                               | BB437937  | -1.43 | 0.27  | -3.7  | 0.008 |
| Bobby sox homolog (Drosophila), mRNA (cDNA clone IMAGE:1430062)                                               | BC024449  | -2.33 | -3.23 | -2.94 | 0.001 |
| Bone morphogenetic protein 8b (Bmp8b), mRNA                                                                   | BM210179  | -1.56 | -1.75 | 2.3   | 0.001 |
| Bromodomain adjacent to zinc finger domain, 2B, mRNA (cDNA clone MGC:183725 IMAGE:9087725)                    | BE847301  | -1.47 | -2.44 | -1.64 | 0.002 |
| bromodomain containing 4                                                                                      | BC008532  | -1.45 | -2.56 | -1.89 | 0.008 |
| BTB and CNC homology 1 (Bach1), mRNA                                                                          | NM_007520 | -1.3  | -2.44 | -2    | 0.001 |
| Calcium binding atopy-related autoantigen 1 (Cbara1), mRNA                                                    | BM233760  | -1.43 | -3.13 | -2.5  | 0.003 |
| CAMP responsive element binding protein 3-like 3 (Creb3l3), mRNA                                              | BC010786  | -1.04 | -3.13 | 1.18  | 0.006 |
| Carboxypeptidase D (Cpd), mRNA                                                                                | BB710395  | -1.32 | -2.56 | -2.38 | 0.001 |
| Carboxypeptidase N, polypeptide 1, mRNA (cDNA clone MGC:25883 IMAGE:4211169)                                  | NM_030703 | -1.61 | -3.23 | -1.92 | 0.004 |
| Carcinoembryonic antigen-related cell adhesion molecule 1 (Ceacam1), transcript variant 3, mRNA               | X15351    | -1.09 | -2.17 | -1.59 | 0.001 |
| Carcinoembryonic antigen-related cell adhesion molecule 20 (Ceacam20), mRNA                                   | AU022382  | -1.49 | -2.5  | -1.39 | 0.001 |
| Casein kinase 1, alpha 1 (Csnk1a1), mRNA                                                                      | AK019176  | -1.59 | -3.13 | -2.04 | 0.008 |
| Casein kinase 2, alpha 1 polypeptide, mRNA (cDNA clone MGC:13987 IMAGE:4188101)                               | BB283759  | -1.75 | -4.17 | -3.33 | 0.001 |
| CASP8 and FADD-like apoptosis regulator, mRNA (cDNA clone                                                     | BE284491  | -1.16 | -3.85 | -1.82 | 0.001 |

|                                                                                       |           |       |       |       |       |
|---------------------------------------------------------------------------------------|-----------|-------|-------|-------|-------|
| MGC:36091 IMAGE:4460554)                                                              |           |       |       |       |       |
| Caspase 3, mRNA (cDNA clone MGC:46907 IMAGE:4482368)                                  | D86352    | -1.25 | -2.33 | -1.69 | 0.001 |
| CCR4-NOT transcription complex, subunit 4 (Cnot4), mRNA                               | AI448404  | -1.27 | -2.04 | -1.64 | 0.001 |
| CD-1 orphan receptor TAK1 (TAK1)                                                      | AU066920  | -1.23 | -2.33 | -1.61 | 0.007 |
| CDNA clone IMAGE:3987110                                                              | BC020092  | -1.67 | -2.5  | -2.33 | 0.001 |
| CDNA clone IMAGE:40048921                                                             | BF016392  | -1.06 | -4    | -2.63 | 0.009 |
| CDNA clone IMAGE:40058901                                                             | BB325849  | -1.35 | -2.17 | -1.41 | 0.003 |
| CDNA clone IMAGE:5721202                                                              | BF682509  | -1.47 | -2.7  | -2.33 | 0.001 |
| Cell division cycle 25 homolog A (S. pombe) (Cdc25a), mRNA                            | BG066470  | -1.14 | -6.67 | -3.85 | 0.001 |
| Centrosomal protein 350, mRNA (cDNA clone IMAGE:3992392)                              | BB645791  | -1.47 | -2.86 | -2.5  | 0.001 |
| Chloride intracellular channel 5, mRNA (cDNA clone MGC:73528 IMAGE:1227040)           | BB610000  | -1.23 | -2.08 | -1.82 | 0.003 |
| Choline kinase alpha, mRNA (cDNA clone IMAGE:3582342)                                 | BB546429  | -1.82 | -2.86 | -2.7  | 0.001 |
| Chromodomain helicase DNA binding protein 4, mRNA (cDNA clone IMAGE:3492938)          | BM502696  | -1.85 | -3.03 | -2.17 | 0.003 |
| Claudin 23 (Cldn23), mRNA                                                             | BC019534  | -1.37 | -2    | -1.56 | 0.001 |
| CMAH mRNA for CMP-NeuAc hydroxylase, complete cds, major form of alternative splicing | AB061276  | -1.15 | -2.63 | -2.13 | 0.001 |
| Coiled-coil domain containing 109A, mRNA (cDNA clone MGC:170884 IMAGE:8862279)        | AV259428  | -1.12 | -2.38 | -1.67 | 0.001 |
| Copine III, mRNA (cDNA clone IMAGE:4977484)                                           | BM213277  | -1.75 | -2.08 | -1.41 | 0.001 |
| CREB binding protein (Crebbp), mRNA                                                   | BG069466  | -1.79 | -3.45 | -2.94 | 0.001 |
| CREB regulated transcription coactivator 3, mRNA (cDNA clone MGC:19083 IMAGE:4195538) | BC011210  | -1.43 | -2.63 | -2.13 | 0.001 |
| Cullin 5, mRNA (cDNA clone IMAGE:4947730)                                             | BB702110  | -1.69 | -2.86 | -2.7  | 0.001 |
| Cyclin G2 (Ccng2), mRNA                                                               | U95826    | -1.43 | -2.17 | -1.56 | 0.001 |
| Cyclin-dependent kinase inhibitor 1A (P21) (Cdkn1a), transcript variant 1, mRNA       | NM_007669 | -1.72 | -2.7  | -1.39 | 0.001 |
| DEAD (Asp-Glu-Ala-Asp) box polypeptide 46 (Ddx46), mRNA                               | BG243238  | -1.25 | -2.13 | -1.85 | 0.001 |

|                                                                                     |           |       |       |       |       |
|-------------------------------------------------------------------------------------|-----------|-------|-------|-------|-------|
| DEAD (Asp-Glu-Ala-Asp) box polypeptide 6, mRNA (cDNA clone MGC:29113 IMAGE:5043599) | BF226295  | -1.43 | -2.86 | -2.7  | 0.001 |
| DEAD (Asp-Glu-Ala-Asp) box polypeptide 60, mRNA (cDNA clone IMAGE:4037887)          | BC013672  | -1.16 | -2.04 | 1.17  | 0.002 |
| DENN/MADD domain containing 1B, mRNA (cDNA clone MGC:176351 IMAGE:9056002)          | AW488889  | -1.23 | -2.56 | -2.04 | 0.001 |
| Desmoglein 2 (Dsg2), mRNA                                                           | BC020144  | -1.12 | -2.33 | -1.92 | 0.001 |
| Deubiquitinating enzyme UBH1                                                        | BI558267  | -1.23 | -2.27 | -1.59 | 0.004 |
| Dia protein                                                                         | Y15910    | -1.59 | -2.08 | -1.16 | 0.006 |
| DNA-damage inducible transcript 3, mRNA (cDNA clone MGC:18641 IMAGE:4012433)        | BB200603  | -2.27 | -7.14 | -2.5  | 0.005 |
| DnaJ (Hsp40) homolog, subfamily C, member 5, mRNA (cDNA clone IMAGE:4975709)        | BI685030  | -1.28 | -2.22 | -1.35 | 0.001 |
| Dynamin binding protein, mRNA (cDNA clone IMAGE:5135276)                            | AK010367  | -1.32 | -2.5  | -1.82 | 0.001 |
| E(y)2 homolog                                                                       | AI595744  | -1.23 | -2.27 | -1.79 | 0.002 |
| E1 protein                                                                          | BI437883  | -1.25 | -3.33 | -2.56 | 0.001 |
| E1A binding protein p400, mRNA (cDNA clone IMAGE:5116582)                           | BM236717  | -1.72 | -3.13 | -2.08 | 0.006 |
| Ecotropic viral integration site 5 (Evi5), mRNA                                     | AI255184  | -1.28 | -2.04 | -1.92 | 0.004 |
| Endonuclease domain containing 1, mRNA (cDNA clone IMAGE:5007670)                   | BF168366  | -1.33 | -2.08 | -1.72 | 0.001 |
| Enhancer trap locus 4, mRNA (cDNA clone IMAGE:4988846)                              | BB557242  | -1.37 | -5.26 | -2.33 | 0.002 |
| Eph receptor A1                                                                     | AK017662  | -1.15 | -8.33 | -2.33 | 0.001 |
| Ephrin B1, mRNA (cDNA clone MGC:14047 IMAGE:3602195)                                | NM_010110 | -1.23 | -2.38 | -1.59 | 0.001 |
| Ephrin B2 (Efnb2), mRNA                                                             | U30244    | -1.18 | -2.22 | -1.67 | 0.001 |
| ERBB receptor feedback inhibitor 1 (Errfi1), mRNA                                   | NM_133753 | -1.64 | -2.13 | -1.49 | 0.003 |
| ESTs                                                                                | BG069080  | -1.12 | -2.17 | -1.2  | 0.005 |
| ESTs                                                                                | BG230349  | -1.23 | -2.7  | -1.02 | 0.006 |
| ESTs                                                                                | BG060596  | -1.72 | -2.27 | -1.19 | 0.007 |
| ESTs                                                                                | BB164673  | -1.35 | -2.27 | -1.52 | 0.001 |

|                                                                                                            |          |       |        |       |       |
|------------------------------------------------------------------------------------------------------------|----------|-------|--------|-------|-------|
| ESTs                                                                                                       | BB710772 | -1.2  | -2.86  | -1.39 | 0.005 |
| ESTs                                                                                                       | BB533836 | -1.15 | -2.22  | -2    | 0.001 |
| ESTs                                                                                                       | BB307737 | -1.45 | -2.08  | -1.82 | 0.008 |
| ESTs                                                                                                       | BG143499 | -1.37 | -2.13  | -2    | 0.004 |
| ESTs                                                                                                       | BB534501 | -1.33 | -2.38  | -2.17 | 0.009 |
| ESTs                                                                                                       | BM124834 | -1.64 | -2.5   | -2    | 0.009 |
| ESTs                                                                                                       | BI076549 | -1.69 | -2.94  | -2.63 | 0.001 |
| ESTs                                                                                                       | BB469236 | -3.45 | -4.55  | -1.05 | 0.008 |
| ESTs                                                                                                       | AV256955 | -2    | -4.35  | -1.92 | 0.004 |
| ESTs                                                                                                       | BB251396 | -2.17 | -3.23  | -2.56 | 0.004 |
| ESTs                                                                                                       | BM247816 | -1.75 | -6.25  | -3.85 | 0.001 |
| ESTs                                                                                                       | BG070157 | -4.55 | -11.11 | -1.45 | 0.002 |
| ESTs                                                                                                       | AW553147 | -4.76 | -6.25  | -3.85 | 0.001 |
| ESTs                                                                                                       | BB233597 | -4.35 | -16.67 | -4.55 | 0.007 |
| ESTs, Highly similar to S12207 hypothetical protein (M.musculus)                                           | BM198308 | -1.59 | -2.44  | -1.85 | 0.004 |
| ESTs, Moderately similar to A42915 type II cAMP-dependent protein kinase RII anchoring protein (H.sapiens) | BB011550 | -1.67 | -2.5   | -2.44 | 0.004 |
| ESTs, Weakly similar to JAK3 MOUSE TYROSINE-PROTEIN KINASE JAK3 (M.musculus)                               | AW536892 | -1.09 | -2.08  | -1.45 | 0.001 |
| Ethanolamine kinase 1, mRNA (cDNA clone IMAGE:5320201)                                                     | BB177192 | -1.25 | -4.17  | -2    | 0.003 |
| Ets variant gene 5, mRNA (cDNA clone MGC:28414 IMAGE:4036564)                                              | BG966751 | -1.22 | -2.08  | -1.79 | 0.001 |
| Euchromatic histone lysine N-methyltransferase 2 (Ehmt2), transcript variant short, mRNA                   | BI412952 | -1.41 | -2.13  | -2    | 0.001 |
| Eukaryotic translation initiation factor 2C, 2 (Eif2c2), mRNA                                              | AW553784 | -1.72 | -4.55  | -2.38 | 0.001 |
| Eukaryotic translation initiation factor 3, subunit A (Eif3a), mRNA                                        | AW701127 | -1.45 | -2.5   | -2    | 0.001 |
| Eukaryotic translation initiation factor 3, subunit C (Eif3c), mRNA                                        | BB858329 | -1.35 | -2.38  | -2.13 | 0.001 |
| Eukaryotic translation initiation factor 4, gamma 1 (Eif4g1), transcript variant 1, mRNA                   | BF227830 | -1.15 | -2.7   | -1.79 | 0.001 |

|                                                                                                          |           |       |       |       |       |
|----------------------------------------------------------------------------------------------------------|-----------|-------|-------|-------|-------|
| Eukaryotic translation initiation factor 4E binding protein 2, mRNA (cDNA clone MGC:13950 IMAGE:4218820) | BI453292  | -1.45 | -2.44 | -2.27 | 0.001 |
| Expressed sequence C79407, mRNA (cDNA clone IMAGE:4010593)                                               | BB540053  | -2.08 | -2.22 | -2.04 | 0.005 |
| Family with sequence similarity 13, member A (Fam13a), mRNA                                              | BB745929  | -1.15 | -2.22 | -2.13 | 0.001 |
| FBJ osteosarcoma oncogene, mRNA (cDNA clone MGC:36690 IMAGE:2582234)                                     | AV026617  | -1.45 | -2.33 | -1.85 | 0.002 |
| F-box and WD-40 domain protein 2 (Fbxw2), mRNA                                                           | BB309090  | -1.59 | -8.33 | -4.76 | 0.001 |
| Fc receptor related protein X                                                                            | BB219290  | -2.38 | -7.69 | 1.1   | 0.001 |
| Filamin, beta, mRNA (cDNA clone IMAGE:3488025)                                                           | BM206272  | -1.35 | -2.63 | -2.44 | 0.001 |
| G protein-coupled receptor, family C, group 5, member A, mRNA (cDNA clone IMAGE:4989234)                 | BG064659  | -1.25 | -2.22 | -1.39 | 0.007 |
| G two S phase expressed protein 1, mRNA (cDNA clone MGC:25262 IMAGE:4039841)                             | NM_013882 | -1.49 | -2.13 | 1.14  | 0.006 |
| GA repeat binding protein, beta 2, mRNA (cDNA clone MGC:161254 IMAGE:40141578)                           | BF715147  | -1.2  | -2.04 | -1.15 | 0.008 |
| Gapex-5                                                                                                  | BM123170  | -1.22 | -2.13 | -1.69 | 0.001 |
| GAP-related interacting partner to E12                                                                   | BB552367  | -1.02 | -3.45 | -1.11 | 0.006 |
| Gene model 967, (NCBI) (Gm967), mRNA                                                                     | AW457804  | -1.19 | -2.17 | -2.04 | 0.001 |
| Genetic suppressor element 1, mRNA (cDNA clone IMAGE:4486777)                                            | BE863648  | -1.35 | -2.17 | -1.49 | 0.001 |
| Giant axonal neuropathy, mRNA (cDNA clone IMAGE:40062226)                                                | BB187898  | -1.25 | -2.44 | -2.22 | 0.005 |
| Glucosaminyl (N-acetyl) transferase 2, I-branching enzyme (Gcnt2), transcript variant 2, mRNA            | AK019924  | -1.32 | -2.56 | 1.05  | 0.005 |
| Glycogen synthase kinase 3 beta, mRNA (cDNA clone MGC:6814 IMAGE:2648507)                                | BQ173949  | -1.69 | -3.57 | -2.44 | 0.007 |
| glycoprotein A33 (transmembrane)                                                                         | AK008784  | -1.09 | -2.38 | -2.04 | 0.001 |
| Golgi autoantigen, golgin subfamily a, 4, mRNA (cDNA clone IMAGE:3496100)                                | NM_018748 | -1.45 | -2.38 | -2.22 | 0.001 |
| Golgi-specific brefeldin A-resistance factor 1, mRNA (cDNA clone                                         | BB744704  | -1.69 | -6.25 | -4    | 0.001 |

|                                                                                     |           |       |       |       |       |
|-------------------------------------------------------------------------------------|-----------|-------|-------|-------|-------|
| IMAGE:5352103)                                                                      |           |       |       |       |       |
| Granule cell antiserum positive 14 (Gcap14), transcript variant 2, mRNA             | BB698883  | -1.85 | -2.5  | -2.22 | 0.002 |
| GTP binding protein 2 (Gtpbp2), transcript variant 1, mRNA                          | AI849247  | -1.47 | -3.23 | -1.79 | 0.001 |
| Haptoglobin (Hp), mRNA                                                              | NM_017370 | -1.82 | -2.44 | 18.36 | 0.001 |
| HEAT repeat containing 6 (Heatr6), mRNA                                             | BF150550  | -1.43 | -2.78 | -1.53 | 0.001 |
| HECT domain containing 1 (Hectd1), mRNA                                             | BE630599  | -1.49 | -2.44 | -2.17 | 0.001 |
| Heparin-binding EGF-like growth factor (Hbegf), mRNA                                | L07264    | -2.04 | -4.35 | -2.44 | 0.001 |
| Hepatic nuclear factor 4, alpha, mRNA (cDNA clone MGC:31368 IMAGE:4238842)          | NM_008261 | -1.16 | -2.38 | -2.08 | 0.001 |
| Imidazoline receptor I-1-like protein                                               | AK014314  | -1.64 | -3.13 | -2.04 | 0.006 |
| Inhibitor of DNA binding 1, mRNA (cDNA clone MGC:36214 IMAGE:4206508)               | U43884    | -1.59 | -2.17 | -2.13 | 0.001 |
| INO80 complex subunit D, mRNA (cDNA clone MGC:183902 IMAGE:9087902)                 | BE197105  | -1.56 | -4    | -3.13 | 0.001 |
| Insulin receptor substrate 2, mRNA (cDNA clone MGC:182676 IMAGE:9056570)            | BE199054  | -1.45 | -3.45 | -2.13 | 0.001 |
| Integrin alpha M (Itgam), transcript variant 2, mRNA                                | NM_008401 | -1.14 | -1.16 | 2.69  | 0.001 |
| Integrin beta 6 (Itgb6), mRNA                                                       | NM_021359 | -1.49 | -2.7  | 1.1   | 0.001 |
| Intermediate filament family orphan 2, mRNA (cDNA clone MGC:36549 IMAGE:4952810)    | BG066466  | -1.49 | -3.03 | -2.44 | 0.001 |
| Jumonji, AT rich interactive domain 1A (Rbp2 like), mRNA (cDNA clone IMAGE:4036309) | BB376407  | -2.08 | -4    | -3.33 | 0.001 |
| Jun-B oncogene, mRNA (cDNA clone MGC:6021 IMAGE:3592704)                            | NM_008416 | -1.41 | -2.38 | -1.16 | 0.001 |
| KIF13A                                                                              | AV277094  | -1.32 | -2.7  | -1.96 | 0.002 |
| Kinesin family member 2C (Kif2c), mRNA                                              | AK015046  | -2.13 | -2.13 | 1.01  | 0.001 |
| Kinesin family member 5B (Kif5b), mRNA                                              | BI328541  | -1.09 | -2.33 | -1.64 | 0.001 |
| Kit ligand, mRNA (cDNA clone MGC:18402 IMAGE:3662792)                               | M64262    | -1.37 | -2.08 | -1.92 | 0.001 |
| KN motif and ankyrin repeat domains 2 (Kank2), mRNA                                 | BC010245  | -1.22 | -2.33 | -1.89 | 0.008 |

|                                                                                                                                                              |          |       |       |       |       |
|--------------------------------------------------------------------------------------------------------------------------------------------------------------|----------|-------|-------|-------|-------|
| Kruppel-like factor 3 (basic) (Klf3), mRNA                                                                                                                   | AK007959 | -1.37 | -2.22 | -1.85 | 0.006 |
| Kruppel-like factor 6 (Klf6), mRNA                                                                                                                           | AF072403 | -1.92 | -4.76 | -3.57 | 0.001 |
| leucine rich repeat containing 41                                                                                                                            | BB524016 | -1.92 | -5.88 | -1.67 | 0.005 |
| Leucine zipper protein 1 (Luzp1), mRNA                                                                                                                       | BB705823 | -1.61 | -3.03 | -2.94 | 0.001 |
| LIM and senescent cell antigen-like domains 1 (Lims1), mRNA                                                                                                  | BC005621 | -1.25 | -2.08 | -1.92 | 0.001 |
| Low density lipoprotein receptor-related protein 6 (Lrp6), mRNA                                                                                              | BB437173 | -1.61 | -2.44 | -2    | 0.001 |
| Lysozyme-like 4 (Lyzl4), mRNA                                                                                                                                | BC024932 | -1.09 | -5.88 | -4.35 | 0.003 |
| MAX dimerization protein 1, mRNA (cDNA clone IMAGE:5345831)                                                                                                  | L38926   | -1.75 | -3.45 | -1.75 | 0.001 |
| Membrane protein, palmitoylated 7 (MAGUK p55 subfamily member 7) (Mpp7), mRNA                                                                                | AK012883 | -1.54 | -2.44 | -1.56 | 0.001 |
| Membrane-associated ring finger (C3HC4) 3, mRNA (cDNA clone MGC:130168 IMAGE:40052074)                                                                       | AV272467 | -3.13 | -4.35 | -2.5  | 0.001 |
| MKIAA0145 protein                                                                                                                                            | BB094429 | -1.03 | -2.17 | -1.79 | 0.001 |
| MKIAA1453 protein                                                                                                                                            | BG063007 | -2.08 | -3.23 | -2.7  | 0.004 |
| MKIAA4006 protein                                                                                                                                            | BB535888 | -1.3  | -2.04 | -1.96 | 0.001 |
| Mucosa associated lymphoid tissue lymphoma translocation gene 1, mRNA (cDNA clone MGC:124470 IMAGE:40048908)                                                 | BM239348 | -1.69 | -3.45 | -1.39 | 0.008 |
| Mus musculus adult male hippocampus cDNA, RIKEN full-length enriched library, clone:2900034J12:interferon-stimulated protein (15 kDa), full insert sequence. | AK019325 | -1.61 | -2.04 | 3.12  | 0.005 |
| Mus musculus, Similar to RIKEN cDNA 2610036A20 gene, clone IMAGE:5009479, mRNA.                                                                              | BC027739 | -1.64 | -2.56 | -2.5  | 0.001 |
| Myeloid/lymphoid or mixed-lineage leukemia 3, mRNA (cDNA clone IMAGE:4192553)                                                                                | BC022622 | -1.43 | -2.38 | -1.89 | 0.001 |
| Netrin receptor Unc5h2 (Unc5h2 gene)                                                                                                                         | AK018177 | -1.35 | -2.38 | -1.75 | 0.001 |
| Nipped-B homolog (Drosophila), mRNA (cDNA clone IMAGE:5354629)                                                                                               | BC025455 | -1.64 | -4.17 | -3.85 | 0.001 |
| NRSF/REST mRNA for neural-restrictive silencer factor nrsf/rest                                                                                              | BI153474 | -1.79 | -2.86 | -2.56 | 0.001 |
| Nuclear receptor subfamily 3, group C, member 1 (Nr3c1), mRNA                                                                                                | BB600983 | -1.3  | -2.5  | -1.79 | 0.001 |



|                                                                                                   |           |       |       |       |       |
|---------------------------------------------------------------------------------------------------|-----------|-------|-------|-------|-------|
| Nucleolar protein 9 (Nol9), mRNA                                                                  | AK014568  | -1.1  | -2.33 | -1.09 | 0.009 |
| N-WASP protein                                                                                    | BF466143  | -1.64 | -3.45 | -3.45 | 0.001 |
| Pantothenate kinase 3 (Pank3), mRNA                                                               | BC027089  | -1.54 | -2.27 | -2.13 | 0.001 |
| Peptidyl-prolyl isomerase G (cyclophilin G), mRNA (cDNA clone MGC:183605 IMAGE:9087605)           | BG069107  | -1.37 | -2    | -1.85 | 0.001 |
| Peripheral benzodiazepine receptor associated protein (Pap7)                                      | BI965035  | -1.25 | -2.22 | -2.04 | 0.001 |
| Phosphate cytidyltransferase 1, choline, alpha isoform, mRNA (cDNA clone MGC:18635 IMAGE:4162053) | NM_009981 | -1.19 | -2.08 | -1.47 | 0.001 |
| phosphatidylinositol glycan anchor biosynthesis, class A                                          | AK014488  | -1.41 | -2    | -1.49 | 0.001 |
| Plasminogen activator, urokinase receptor, mRNA (cDNA clone IMAGE:3158012)                        | X62701    | -1.02 | -1.22 | 2     | 0.001 |
| Pleckstrin homology domain interacting protein, mRNA (cDNA clone IMAGE:5366274)                   | BM221262  | -1.25 | -2.04 | -1.61 | 0.004 |
| Pleiomorphic adenoma gene-like 2, mRNA (cDNA clone IMAGE:5401617)                                 | NM_018807 | -1.12 | -2.38 | -1.45 | 0.008 |
| Potassium channel alpha subunit (Kv9.2)                                                           | BB442995  | -2.44 | -4.76 | -1.01 | 0.009 |
| PR domain containing 2, with ZNF domain, mRNA (cDNA clone MGC:183975 IMAGE:9087975)               | BM226301  | -1.45 | -2.33 | -1.82 | 0.001 |
| Predicted gene, ENSMUSG00000074747 (ENSMUSG00000074747), mRNA                                     | BG975608  | -1.37 | -2.08 | -1.85 | 0.001 |
| PREDICTED: Mus musculus additional sex combs like 3 (Drosophila) (Asxl3), mRNA                    | BB528113  | -1.39 | -7.14 | -1.59 | 0.001 |
| PREDICTED: Mus musculus DnaJ (Hsp40) homolog, subfamily B, member 14 (Dnajb14), mRNA              | BE952491  | -1.67 | -2.7  | -2.17 | 0.001 |
| PREDICTED: Mus musculus dynein heavy chain domain 1 (Dnhd1), mRNA                                 | BB196262  | -1.04 | -2.86 | -2.5  | 0.008 |
| PREDICTED: Mus musculus RIKEN cDNA 1500005K14 gene (1500005K14Rik), mRNA                          | BF101721  | -1.39 | -3.7  | -2.7  | 0.001 |
| Prolactin receptor, mRNA (cDNA clone MGC:6147 IMAGE:3500076)                                      | M22958    | -1.16 | -2.04 | -1.75 | 0.001 |

|                                                                                                                  |           |       |       |       |       |
|------------------------------------------------------------------------------------------------------------------|-----------|-------|-------|-------|-------|
| protein kinase, cAMP dependent regulatory, type II alpha                                                         | AK013274  | -1.27 | -1.54 | 2.23  | 0.005 |
| Protein kinase, X-linked (Prkx), mRNA                                                                            | BC006875  | -1.27 | -2.22 | -1.47 | 0.001 |
| Protein O-fucosyltransferase 1 (Pofut1), transcript variant 1, mRNA                                              | BB280835  | -1.12 | -3.03 | -1.3  | 0.007 |
| Protein phosphatase 1, regulatory (inhibitor) subunit 15b, mRNA (cDNA clone IMAGE:3599662)                       | BE865230  | -1.32 | -2.04 | -1.64 | 0.002 |
| Proviral integration site 1 (Pim1), mRNA                                                                         | NM_008842 | -2.38 | -2.7  | 1.16  | 0.001 |
| PRP40 pre-mRNA processing factor 40 homolog A (yeast) (Prpf40a), mRNA                                            | BG064340  | -1.64 | -2.86 | -2.63 | 0.001 |
| RalA binding protein 1 (Ralbp1), mRNA                                                                            | NM_009067 | -1.37 | -2.17 | -2.04 | 0.001 |
| Rap1 interacting factor 1 homolog (yeast), mRNA (cDNA clone IMAGE:4503215)                                       | BG070871  | -1.64 | -3.03 | -2.86 | 0.001 |
| Rb1cc1 mRNA for transcription factor                                                                             | BE570980  | -1.69 | -2.17 | -2.17 | 0.002 |
| Remodeling and spacing factor 1 (Rsf1), mRNA                                                                     | BB053418  | -1.33 | -2.08 | -1.92 | 0.007 |
| Restin (Reed-Steinberg cell-expressed intermediate filament-associated protein), mRNA (cDNA clone IMAGE:3986143) | AK014540  | -1.3  | -2.08 | -1.89 | 0.004 |
| REX1, RNA exonuclease 1 homolog ( <i>S. cerevisiae</i> ) (Rexo1), transcript variant 1, mRNA                     | AK012127  | -2.04 | -7.14 | -4.35 | 0.001 |
| Rho/rac guanine nucleotide exchange factor (GEF) 18, mRNA (cDNA clone IMAGE:4012223)                             | BB227996  | -2.56 | -5.56 | -3.7  | 0.005 |
| ribonuclease L (2', 5'-oligoadenylate synthetase-dependent)                                                      | BF714880  | -1.2  | -2.08 | -1.49 | 0.003 |
| RIKEN cDNA 0610010K06 gene, mRNA (cDNA clone MGC:40682 IMAGE:3498026)                                            | AK002489  | -1.28 | -2.08 | -1.67 | 0.001 |
| RIKEN cDNA 2010002M12 gene, mRNA (cDNA clone MGC:169826 IMAGE:8861221)                                           | BB703633  | -1.33 | -2.27 | -1.19 | 0.004 |
| RIKEN cDNA 2010003K11 gene, mRNA (cDNA clone MGC:37907 IMAGE:5102159)                                            | BC021951  | 1     | -2.44 | -1.2  | 0.003 |
| RIKEN cDNA 2010109I03 gene (2010109I03Rik), mRNA                                                                 | NM_025929 | -1.14 | -1.28 | 4.5   | 0.001 |
| RIKEN cDNA 2310010I16 gene, mRNA (cDNA clone IMAGE:3603631)                                                      | BI695131  | -1.33 | -2.22 | -1.96 | 0.003 |

|                                                                                                                       |           |       |        |       |       |
|-----------------------------------------------------------------------------------------------------------------------|-----------|-------|--------|-------|-------|
| RIKEN cDNA 2410089E03 gene, mRNA (cDNA clone IMAGE:6824838)                                                           | BE982367  | -1.1  | -6.25  | -1.22 | 0.001 |
| RIKEN cDNA 2700049A03 gene, mRNA (cDNA clone MGC:183655 IMAGE:9087655)                                                | BM230224  | -1.59 | -11.11 | -1.72 | 0.001 |
| RIKEN cDNA 2810474O19 gene, mRNA (cDNA clone IMAGE:4952280)                                                           | BM232998  | -1.61 | -4     | -2.63 | 0.001 |
| RIKEN cDNA 3110001I20 gene, mRNA (cDNA clone IMAGE:3481909)                                                           | BB427489  | -1.45 | -2.86  | -1.96 | 0.001 |
| RIKEN cDNA 4632415L05 gene, mRNA (cDNA clone MGC:30979 IMAGE:5252327)                                                 | BC023403  | -1.64 | -2.38  | -2.27 | 0.001 |
| RIKEN cDNA 4732418C07 gene, mRNA (cDNA clone IMAGE:4037144)                                                           | BB318254  | -1.14 | -2.5   | -1.69 | 0.001 |
| RIKEN cDNA 4930402E16 gene, mRNA (cDNA clone MGC:159128 IMAGE:40129940)                                               | BB667201  | -1.35 | -2.38  | -1.85 | 0.003 |
| RIKEN cDNA 4930539E08 gene, mRNA (cDNA clone MGC:144096 IMAGE:40097681)                                               | AV374644  | -1.79 | -2.7   | -1.69 | 0.001 |
| RIKEN cDNA 5730559C18 gene (5730559C18Rik), mRNA                                                                      | NM_028872 | -2.63 | -5.88  | -3.03 | 0.001 |
| RIKEN cDNA 9130229H14 gene, mRNA (cDNA clone IMAGE:3369383)                                                           | AI552688  | -1.43 | -3.7   | -3.45 | 0.001 |
| RIKEN cDNA 9130404D08 gene (9130404D08Rik), mRNA                                                                      | BC023401  | -1.56 | -3.03  | -2.22 | 0.004 |
| RIKEN cDNA E330018D03 gene, mRNA (cDNA clone IMAGE:9056291)                                                           | BB555250  | -1.72 | -2.5   | -2.13 | 0.001 |
| RIP-13 (RIP13)                                                                                                        | U22016    | -1.25 | -2     | -1.85 | 0.004 |
| RMI1, RecQ mediated genome instability 1, homolog ( <i>S. cerevisiae</i> ), mRNA (cDNA clone MGC:47027 IMAGE:4013563) | BE686864  | -1.89 | -2.04  | -1.92 | 0.001 |
| RNA binding motif protein 25 (Rbm25), mRNA                                                                            | BI106967  | -1.56 | -2.56  | -2.38 | 0.001 |
| RNA-binding protein isoform G3BP-2a (G3BP2)                                                                           | NM_011816 | -1.33 | -2.13  | -1.56 | 0.001 |
| S100 calcium binding protein A10 (calpactin)                                                                          | BB450829  | -1.79 | -3.57  | -2.44 | 0.001 |
| S-adenosylhomocysteine hydrolase-like 2 (Ahcyl2), mRNA                                                                | BG072404  | -1.23 | -2.27  | -2.27 | 0.001 |
| SECIS binding protein 2, mRNA (cDNA clone IMAGE:1447063)                                                              | AA198634  | -1.33 | -2.22  | -2.08 | 0.001 |

|                                                                                                                               |           |       |       |       |       |
|-------------------------------------------------------------------------------------------------------------------------------|-----------|-------|-------|-------|-------|
| Sema domain, seven thrombospondin repeats (type 1 and type 1-like), transmembrane domain (TM) and short cytoplasmic domain, ( | NM_009154 | -1.19 | -2.22 | -1.82 | 0.001 |
| Serine/arginine repetitive matrix 2, mRNA (cDNA clone IMAGE:5354975)                                                          | BG915272  | -1.49 | -2.17 | -2.17 | 0.002 |
| Serine/arginine-rich protein specific kinase 2, mRNA (cDNA clone MGC:27638 IMAGE:4507346)                                     | NM_009274 | -1.37 | -2    | -1.56 | 0.006 |
| Serum/glucocorticoid regulated kinase 1, mRNA (cDNA clone MGC:11778 IMAGE:3594892)                                            | NM_011361 | -1.35 | -2.08 | -1.82 | 0.004 |
| Small proline-rich protein 2K (Sprr2k), mRNA                                                                                  | NM_011477 | -1.33 | -2.13 | 1.13  | 0.001 |
| SMC4 structural maintenance of chromosomes 4-like 1 (yeast), mRNA (cDNA clone IMAGE:3589989)                                  | BI665568  | -1.92 | -2.63 | -1.92 | 0.001 |
| SMEK homolog 2, suppressor of mek1 (Dictyostelium) (Smek2), mRNA                                                              | AV305633  | -1.39 | -2.08 | -2.08 | 0.001 |
| Solute carrier family 1 (glutamate/neutral amino acid transporter), member 4 (Slc1a4), mRNA                                   | BB277461  | -1.47 | -2.08 | -1.43 | 0.005 |
| Splicing factor, arginine/serine-rich 2, interacting protein (Sfrs2ip), mRNA                                                  | AK012092  | -1.3  | -2.22 | -1.89 | 0.002 |
| Sprouty 4 (Spry4)                                                                                                             | BG070168  | -1.82 | -5.88 | -1.23 | 0.003 |
| Squamous cell carcinoma antigen recognized by T-cells 3, mRNA (cDNA clone IMAGE:2648844)                                      | BB546730  | -1.49 | -2.86 | -2.13 | 0.006 |
| ST3 beta-galactoside alpha-2,3-sialyltransferase 1 (St3gal1), mRNA                                                            | NM_009177 | -1.14 | -1.2  | 2.1   | 0.001 |
| Ste20-related kinase SMAK (SMAK)                                                                                              | NM_009289 | -1.19 | -2.22 | -1.69 | 0.001 |
| STEAP family member 3, mRNA (cDNA clone MGC:47007 IMAGE:2651584)                                                              | AK003108  | -1.59 | -2.94 | -2.04 | 0.008 |
| Stomatin, mRNA (cDNA clone MGC:6019 IMAGE:3593052)                                                                            | AF093620  | -1.47 | -2.04 | 1.3   | 0.001 |
| Structural maintenance of chromosomes 6, mRNA (cDNA clone IMAGE:4224576)                                                      | AU022584  | -1.43 | -2.33 | -2.33 | 0.001 |
| SWI/SNF related, matrix associated, actin dependent regulator of chromatin, subfamily a, member 4, mRNA (cDNA clone IMAGE:502 | AW701251  | -1.64 | -3.03 | -2.5  | 0.001 |
| TAO kinase 1, mRNA (cDNA clone IMAGE:1380120)                                                                                 | BM238077  | -1.89 | -3.13 | -2.13 | 0.003 |

|                                                |          |       |       |       |       |
|------------------------------------------------|----------|-------|-------|-------|-------|
| Tetraspanin 8 (Tspan8), mRNA                   | BM211929 | -1.64 | -2.94 | -2.27 | 0.001 |
| THO complex 2 (Thoc2), mRNA                    | BB703762 | -1.39 | -2.38 | -2.04 | 0.002 |
| TNF receptor-associated factor 1 (Traf1), mRNA | BB218245 | -1.18 | -2.13 | -1.22 | 0.001 |
| Transcribed locus                              | BE954012 | -1.54 | -6.25 | -3.23 | 0.001 |
| Transcribed locus                              | BI080417 | -1.16 | -2.5  | -1.89 | 0.001 |
| Transcribed locus                              | AI841294 | -1.02 | -1.15 | 2.86  | 0.005 |
| Transcribed locus                              | BB365661 | -1.92 | -2.94 | -2.5  | 0.001 |
| Transcribed locus                              | BB660695 | -1.16 | -2.17 | -1.67 | 0.001 |
| Transcribed locus                              | BB024025 | -1.49 | -3.85 | 1.54  | 0.001 |
| Transcribed locus                              | BI110088 | -1.37 | -2.22 | -1.45 | 0.001 |
| Transcribed locus                              | BB332976 | -1.22 | -2.22 | -1.16 | 0.003 |
| Transcribed locus                              | BB554636 | -1.56 | -2.7  | -1.82 | 0.001 |
| Transcribed locus                              | AI505544 | -1.67 | -2.08 | -1.52 | 0.002 |
| Transcribed locus                              | AW259574 | -1.23 | -2.04 | -2    | 0.001 |
| Transcribed locus                              | BB039020 | -1.27 | -9.09 | -1.59 | 0.002 |
| Transcribed locus                              | BM229258 | -1.3  | -2.17 | -1.82 | 0.001 |
| Transcribed locus                              | BB042422 | -1.69 | -3.7  | -2.94 | 0.001 |
| Transcribed locus                              | BB284535 | -2.08 | -4.76 | -3.45 | 0.001 |
| Transcribed locus                              | BB383225 | -1.23 | -7.14 | -3.23 | 0.003 |
| Transcribed locus                              | AW456056 | -2.44 | -3.33 | -2.38 | 0.001 |
| Transcribed locus                              | BB192700 | -1.39 | -2.78 | -1.61 | 0.003 |
| Transcribed locus                              | BB041057 | -1.96 | -2.43 | -1.92 | 0.002 |
| Transcribed locus                              | BI499715 | -1.67 | -3.23 | -3.13 | 0.001 |
| Transcribed locus                              | BG802688 | -1.96 | -3.03 | -2.22 | 0.007 |
| Transcribed locus                              | BE948809 | -2.13 | -3.85 | -3.85 | 0.005 |
| Transcribed locus                              | BB667153 | -2.13 | -3.45 | -2.08 | 0.002 |
| Transcribed locus                              | BB629079 | -1.54 | -2.04 | -1.92 | 0.006 |
| Transcribed locus                              | AV228517 | -1.39 | -2.22 | -1.22 | 0.003 |

|                                                                                                                               |           |       |       |       |       |
|-------------------------------------------------------------------------------------------------------------------------------|-----------|-------|-------|-------|-------|
| Transcribed locus                                                                                                             | BM201746  | -3.33 | -7.14 | -6.25 | 0.007 |
| Transcribed locus, moderately similar to NP_033921.3 calmodulin binding protein 1 [Mus musculus]                              | BB825704  | -2.17 | -4    | -2.7  | 0.005 |
| Transcribed locus, strongly similar to NP_997871.1 Vasopressin-activated calcium-mobilizing receptor (VACM-1) [Danio rerio]   | BB257147  | -1.3  | -2.33 | -1.89 | 0.001 |
| Transcribed locus, strongly similar to XP_001002434.1 PREDICTED: hypothetical protein [Mus musculus]                          | BE859789  | -1.1  | -2.22 | -1.49 | 0.001 |
| Transcribed locus, weakly similar to XP_851502.1 PREDICTED: similar to Retrovirus-related Pol polyprotein from transposon gyp | AW489535  | -2    | -2.86 | -2.22 | 0.002 |
| Transducer of ErbB-2.1 (Tob1), mRNA                                                                                           | AA242096  | -1.32 | -3.85 | -2.94 | 0.001 |
| Transferrin receptor 1 (TFR1 gene)                                                                                            | BB810450  | -1.09 | -2    | -1.41 | 0.001 |
| Transient receptor potential phospholipase C interacting kinase                                                               | AV320241  | -1.16 | -2.27 | -1.69 | 0.007 |
| Translocated promoter region (Tpr), mRNA                                                                                      | AW554765  | -1.75 | -4    | -2.94 | 0.001 |
| Tribbles homolog 1 (Drosophila) (Trib1), mRNA                                                                                 | AV237242  | -1.82 | -2.56 | -2.22 | 0.001 |
| Trimethylguanosine synthase homolog (S. cerevisiae), mRNA (cDNA clone IMAGE:4159018)                                          | BM233196  | -1.59 | -2.44 | -1.92 | 0.001 |
| Tumor necrosis factor (Tnf), mRNA                                                                                             | NM_013693 | -1.85 | -2    | 3.26  | 0.001 |
| Ubinuclein 1 (Ubn1), mRNA                                                                                                     | AW124741  | -1.64 | -2.7  | -2.04 | 0.004 |
| Ubiquitin specific peptidase 7, mRNA (cDNA clone IMAGE:6827231)                                                               | C77542    | -1.28 | -2.94 | -2.27 | 0.004 |
| Ubiquitin-conjugating enzyme E2B, RAD6 homology (S. cerevisiae) (Ube2b), mRNA                                                 | AK011961  | -1.59 | -2.08 | -2.04 | 0.003 |
| UDP-Gal:betaGlcNAc beta 1,3-galactosyltransferase, polypeptide 5 (B3galt5), transcript variant 1, mRNA                        | NM_033149 | -1.05 | -2.17 | -1.33 | 0.001 |
| vacuolar protein sorting 13 D (yeast)                                                                                         | BB003985  | -2.94 | -5.88 | -5    | 0.001 |
| WNT1 inducible signaling pathway protein 2, mRNA (cDNA clone MGC:41105 IMAGE:1067632)                                         | NM_016873 | -1.11 | -1.41 | 2.09  | 0.009 |
| WW domain binding protein 11, mRNA (cDNA clone MGC:30815 IMAGE:3994221)                                                       | BI737904  | -1.39 | -2.17 | -1.92 | 0.001 |

|                                                                                                       |          |       |       |       |       |
|-------------------------------------------------------------------------------------------------------|----------|-------|-------|-------|-------|
| X-prolyl aminopeptidase (aminopeptidase P) 3, putative, mRNA<br>(cDNA clone MGC:169193 IMAGE:8860588) | BI076709 | -1.33 | -2.04 | -1.52 | 0.001 |
| Zinc finger CCCH type containing 11A (Zc3h11a), mRNA                                                  | AV328883 | -1.28 | -2.27 | -1.54 | 0.001 |
| Zinc finger protein 800, mRNA (cDNA clone MGC:178317<br>IMAGE:9053309)                                | BG063017 | -1.18 | -2.78 | -1.82 | 0.001 |
| Zinc finger, MIZ-type containing 1, mRNA (cDNA clone<br>MGC:86031 IMAGE:6856060)                      | BB729667 | -1.06 | -7.14 | -1.54 | 0.002 |

**(-) represents fold down regulation from day 0 control.**
