# Supplementary material
Source: PubMed Central journal article supplement (PMC3026350)
Supplement: tableS3.pdf [file tableS3.pdf]

**Table C: D0>D2<D4<D6**

| Gene Title                                                                                                                    | Gene Identifier | D2/D0 | D4/D0 | D6/D0 | P     |
|-------------------------------------------------------------------------------------------------------------------------------|-----------------|-------|-------|-------|-------|
| A disintegrin and metallopeptidase domain 8, mRNA (cDNA clone MGC:36123 IMAGE:5324943)                                        | NM_007403       | 1     | 1.2   | 2.73  | 0.001 |
| A disintegrin-like and metallopeptidase (reprolysin type) with thrombospondin type 1 motif, 4, mRNA (cDNA clone MGC:38401 IMA | BG064671        | -3.57 | -1.75 | 3.56  | 0.001 |
| Actin filament associated protein 1-like 2 (Afp112), mRNA                                                                     | BG068103        | -1.09 | 2     | 2.31  | 0.001 |
| Aldo-keto reductase family 1, member C18, mRNA (cDNA clone MGC:25953 IMAGE:4238589)                                           | NM_134066       | -1.41 | -1.15 | 2.17  | 0.001 |
| Alpha-1,3-galactosyltransferase gene                                                                                          | AF297615        | 1     | 1.41  | 2.16  | 0.001 |
| AML-1 regulated transmembrane protein Art-1                                                                                   | AF175771        | -1.47 | 1.34  | 2.19  | 0.002 |
| Apolipoprotein L 11b (Apol11b), mRNA                                                                                          | AA214835        | -2.78 | 1.8   | 2.56  | 0.001 |
| Arachidonate 15-lipoxygenase (Alox15), mRNA                                                                                   | L34570          | -3.23 | -1.05 | 1.55  | 0.006 |
| Armadillo repeat containing, X-linked 4, mRNA (cDNA clone IMAGE:5374915)                                                      | BE865094        | -1.06 | 1.67  | 2.09  | 0.001 |
| Arrestin domain containing 5 (Arrdc5), mRNA                                                                                   | AK005944        | -2.22 | 2.38  | 2.47  | 0.001 |
| AT rich interactive domain 5A (MRF1-like) (Arid5a), mRNA                                                                      | BC027152        | -1.07 | 1.17  | 2.23  | 0.001 |
| Autism susceptibility candidate 2, mRNA (cDNA clone IMAGE:5347232)                                                            | AK012475        | -2.22 | -2.17 | -1.96 | 0.008 |
| B and T lymphocyte associated (Btla), transcript variant 1, mRNA                                                              | BM240873        | -1.06 | 1.42  | 2.18  | 0.008 |
| B144 mRNA, m21r splice variant                                                                                                | U72644          | -1.14 | 1.76  | 3.34  | 0.001 |
| Bone marrow stromal cell antigen 1, mRNA (cDNA clone IMAGE:5356458)                                                           | AI647987        | -1.75 | 1.29  | 3.79  | 0.002 |
| Breast cancer 1 (Brca1), mRNA                                                                                                 | U31625          | -2.7  | -1.28 | 1.01  | 0.005 |
| BTB (POZ) domain containing 11, mRNA (cDNA clone MGC:176106 IMAGE:9055757)                                                    | AK018115        | -1.04 | 1.49  | 2.04  | 0.001 |
| CAMP responsive element modulator, mRNA (cDNA clone IMAGE:3373396)                                                            | AI467599        | -1.14 | 1.11  | 2.01  | 0.001 |

|                                                                                                     |           |       |       |       |       |
|-----------------------------------------------------------------------------------------------------|-----------|-------|-------|-------|-------|
| Cathelicidin antimicrobial peptide (Camp), mRNA                                                     | NM_009921 | -3.7  | 1     | 1.76  | 0.002 |
| CCAAT/enhancer binding protein (C/EBP), beta (Cebpb), mRNA                                          | NM_009883 | -1.08 | 1.18  | 2.67  | 0.001 |
| CCAAT/enhancer binding protein (C/EBP), delta (Cebpd), mRNA                                         | BB831146  | -1.3  | 1.15  | 2.46  | 0.001 |
| CD274 antigen (Cd274), mRNA                                                                         | NM_021893 | -1.05 | 1.13  | 2.78  | 0.001 |
| CD302 antigen, mRNA (cDNA clone MGC:7450 IMAGE:3489789)                                             | NM_025422 | -1.08 | 1.25  | 2.01  | 0.001 |
| CD48 antigen (Cd48), mRNA                                                                           | BE634960  | -1.43 | 1.13  | 2.04  | 0.001 |
| CD52 antigen, mRNA (cDNA clone MGC:40993 IMAGE:1396480)                                             | NM_013706 | -1.12 | 1.27  | 2.26  | 0.001 |
| CD53 antigen, mRNA (cDNA clone MGC:29192 IMAGE:5010267)                                             | NM_007651 | -1.16 | 1.3   | 2.95  | 0.001 |
| CDNA clone IMAGE:9054828                                                                            | AK011178  | -1.07 | 1.27  | 2.09  | 0.001 |
| CDNA clone MGC:179156 IMAGE:9054148                                                                 | BE629676  | -1.03 | 1.19  | 2.22  | 0.003 |
| CDNA sequence AB124611 (AB124611), mRNA                                                             | BM246462  | -2.33 | 2.01  | 4.79  | 0.001 |
| CDNA sequence BC013712, mRNA (cDNA clone IMAGE:3155889)                                             | BB262491  | -1.2  | 1.62  | 3.48  | 0.001 |
| Chemokine (C-C motif) receptor 1, mRNA (cDNA clone MGC:18743 IMAGE:3992755)                         | AV231648  | -2.22 | 1.28  | 2.36  | 0.006 |
| Chemokine (C-X-C motif) ligand 1 (Cxcl1), mRNA                                                      | BB554288  | -1.09 | 1.28  | 8.1   | 0.001 |
| Chemokine (C-X-C motif) ligand 2 (Cxcl2), mRNA                                                      | NM_009140 | -1.33 | 3.07  | 46.75 | 0.001 |
| Chondroitin sulfate N-acetylgalactosaminyltransferase 1, mRNA (cDNA clone MGC:99961 IMAGE:30470205) | AV371987  | -1.08 | 1.21  | 2.15  | 0.001 |
| Coagulation factor V (F5), mRNA                                                                     | NM_007976 | -3.45 | -1.41 | 2.05  | 0.001 |
| Collagen, type I, alpha 2, mRNA (cDNA clone IMAGE:3481648)                                          | BF227507  | 1     | 1.9   | 2.42  | 0.001 |
| Collagen, type III, alpha 1, mRNA (cDNA clone IMAGE:2812464)                                        | AW550625  | -1.15 | 1.58  | 2.16  | 0.001 |
| Collagen, type V, alpha 2 (Col5a2), mRNA                                                            | AV229424  | -1.22 | 1.54  | 2.21  | 0.001 |
| Colony stimulating factor 3 receptor (granulocyte) (Csf3r), mRNA                                    | NM_007782 | -1.2  | 1.51  | 6.13  | 0.001 |
| Complement component 1, q subcomponent, alpha polypeptide, mRNA (cDNA clone MGC:6262 IMAGE:3592169) | NM_007572 | 1     | 1.12  | 2     | 0.001 |
| Complement component 1, q subcomponent, beta polypeptide (C1qb), mRNA                               | AW227993  | -1.01 | 1.43  | 2.28  | 0.001 |
| complement component 1, r subcomponent                                                              | BB558917  | -1.05 | 1.31  | 2.42  | 0.001 |
| Complement component 1, r subcomponent, mRNA (cDNA clone                                            | NM_023143 | -1.02 | 1.57  | 2.58  | 0.001 |

|                                                                                                   |           |       |       |      |       |
|---------------------------------------------------------------------------------------------------|-----------|-------|-------|------|-------|
| MGC:6404 IMAGE:3586055)                                                                           |           |       |       |      |       |
| Complement component 2 (within H-2S), mRNA (cDNA clone MGC:18582 IMAGE:3992881)                   | NM_013484 | -1.2  | 1.46  | 2.57 | 0.001 |
| Cytochrome P450, family 4, subfamily a, polypeptide 31, mRNA (cDNA clone MGC:18880 IMAGE:4237837) | AI647584  | -2    | 1.5   | 1.68 | 0.008 |
| Cytohesin 4, mRNA (cDNA clone IMAGE:5253396)                                                      | AK010908  | -1.08 | 1.16  | 3.41 | 0.001 |
| DEP domain containing 1B, mRNA (cDNA clone MGC:161252 IMAGE:40141540)                             | BB136172  | -2.33 | -1.82 | -1.2 | 0.006 |
| Dermatan sulfate epimerase, mRNA (cDNA clone MGC:62486 IMAGE:6401066)                             | BM207218  | -1.02 | 1.73  | 2.33 | 0.001 |
| DNA segment, Chr 13, ERATO Doi 212, expressed                                                     | BG066320  | -2.27 | 1.16  | 1.54 | 0.007 |
| DNA segment, Chr 15, ERATO Doi 492, expressed                                                     | BG068027  | -1.96 | 1.61  | 3.08 | 0.005 |
| Doublecortin-like kinase 1, mRNA (cDNA clone IMAGE:5006471)                                       | BB757120  | -1.04 | 1.31  | 3    | 0.001 |
| EGF-like-domain, multiple 6 (Egfl6), mRNA                                                         | NM_019397 | -2.44 | 2.12  | 2.67 | 0.004 |
| Eosinophil-associated, ribonuclease A family, member 5 (Ear5), mRNA                               | NM_019398 | -1.12 | 1.53  | 3.33 | 0.007 |
| Epiregulin, mRNA (cDNA clone MGC:36144 IMAGE:5325124)                                             | NM_007950 | -1.06 | 1.21  | 4.66 | 0.001 |
| ESTs                                                                                              | AV227574  | -1.14 | 2.38  | 3.75 | 0.001 |
| ESTs                                                                                              | BB463625  | -1.06 | 1.17  | 3.46 | 0.004 |
| ESTs                                                                                              | AV300716  | -1.23 | 1.49  | 3.6  | 0.001 |
| ESTs                                                                                              | BB820441  | -1.01 | 1.6   | 2.8  | 0.001 |
| ESTs                                                                                              | BB668084  | -1.01 | 1.91  | 3.24 | 0.001 |
| ESTs                                                                                              | BB504737  | -1.02 | 1.41  | 2.22 | 0.001 |
| ESTs                                                                                              | BG068121  | -2.63 | 1.68  | 2.8  | 0.001 |
| ESTs                                                                                              | BI076546  | -2.94 | -2.7  | 2.2  | 0.003 |
| ESTs, Weakly similar to IGEB MOUSE IGE-BINDING PROTEIN (M.musculus)                               | BB409688  | -2.44 | -1.52 | 3.54 | 0.001 |
| Expressed sequence AI607873, mRNA (cDNA clone MGC:183622 IMAGE:9087622)                           | AI607873  | -1.18 | 1.09  | 2.79 | 0.001 |

|                                                                                           |           |       |       |       |       |
|-------------------------------------------------------------------------------------------|-----------|-------|-------|-------|-------|
| Extracellular proteinase inhibitor, mRNA (cDNA clone MGC:14015 IMAGE:4038377)             | NM_007969 | -1.09 | 1.191 | 2.81  | 0.001 |
| Family with sequence similarity 135, member B, mRNA (cDNA clone IMAGE:8860598)            | AK005816  | -7.14 | -2.94 | -2.38 | 0.008 |
| Fascin homolog 1, actin bundling protein (Strongylocentrotus purpuratus) (Fscn1), mRNA    | NM_007984 | -1.04 | 1.76  | 2.85  | 0.001 |
| Formyl peptide receptor 2 (Fpr2), mRNA                                                    | NM_008039 | -1.14 | 1.68  | 9.05  | 0.001 |
| G protein-coupled receptor 132 (Gpr132), mRNA                                             | BB208670  | -1.52 | 1.23  | 2.71  | 0.002 |
| G protein-coupled receptor 171, mRNA (cDNA clone MGC:36313 IMAGE:5068166)                 | BB229616  | -1.64 | -1.05 | 2.24  | 0.001 |
| Gamma-aminobutyric acid (GABA-A) receptor, subunit alpha 3 (Gabra3), mRNA                 | AW557545  | -1.06 | 1.49  | 2.34  | 0.001 |
| Gardner-Rasheed feline sarcoma viral (Fgr) oncogene homolog (Fgr), mRNA                   | BB165085  | -1.32 | 1.04  | 2.19  | 0.001 |
| Glutamine fructose-6-phosphate transaminase 2, mRNA (cDNA clone MGC:18324 IMAGE:4167189)  | NM_013529 | -1.09 | 1.06  | 2.28  | 0.001 |
| G-protein coupled receptor 88 (Gpr88), mRNA                                               | BE947345  | -2.63 | -1.09 | 4.87  | 0.003 |
| Growth arrest and DNA-damage-inducible 45 gamma, mRNA (cDNA clone MGC:5695 IMAGE:3493618) | AK007410  | -1.01 | 1.17  | 2.07  | 0.001 |
| GTP binding protein (gene overexpressed in skeletal muscle)                               | U10551    | -1.06 | 1.51  | 4.71  | 0.001 |
| GTPase, IMAP family member 4, mRNA (cDNA clone MGC:11734 IMAGE:3968418)                   | BC005577  | 1     | 1.54  | 2.08  | 0.001 |
| Hepatocyte growth factor/scatter factor                                                   | BB476818  | -1.35 | 1.29  | 3.82  | 0.003 |
| Histidine decarboxylase (Hdc), mRNA                                                       | AF109137  | -1.15 | 1.29  | 13.05 | 0.001 |
| Histocompatibility 2, Q region locus 8 (H2-Q8), mRNA                                      | AK013097  | -1.23 | 1.13  | 2.68  | 0.006 |
| IKAROS family zinc finger 1 (Ikzf1), transcript variant 2, mRNA                           | AV317621  | -1.06 | 1.18  | 2.03  | 0.003 |
| Inhibin beta-A (Inhba), mRNA                                                              | NM_008380 | -1.56 | 1.16  | 2.51  | 0.001 |
| Integral membrane protein 2A, mRNA (cDNA clone MGC:18323 IMAGE:3668557)                   | BI966443  | -1.02 | 2.09  | 2.47  | 0.001 |

|                                                                                         |           |       |       |       |       |
|-----------------------------------------------------------------------------------------|-----------|-------|-------|-------|-------|
| Integrin beta 7, mRNA (cDNA clone MGC:18486 IMAGE:4187781)                              | NM_013566 | -4.55 | 1     | 1.76  | 0.001 |
| Interferon activated gene 204, mRNA (cDNA clone MGC:18551 IMAGE:4018506)                | NM_008329 | -1.52 | 1.63  | 4.78  | 0.001 |
| Interferon regulatory factor 5 (Irf5), mRNA                                             | NM_012057 | -1.05 | 1.08  | 2.21  | 0.001 |
| Interferon-induced protein 44, mRNA (cDNA clone IMAGE:3984334)                          | BB329808  | -1.01 | 1.39  | 2.96  | 0.001 |
| Interferon-induced protein with tetratricopeptide repeats 2 (Ifit2), mRNA               | NM_008332 | -1.02 | 1.4   | 2.99  | 0.001 |
| Interleukin 1 beta, mRNA (cDNA clone MGC:18555 IMAGE:3989461)                           | BC011437  | -1.12 | 1.32  | 14    | 0.001 |
| Interleukin 10 receptor, alpha (Il10ra), mRNA                                           | NM_008348 | -1.33 | 1.95  | 4.62  | 0.004 |
| Kruppel-type zinc-finger protein ZNF264-like mRNA, complete sequence                    | AF365933  | -6.67 | -4.55 | -1.3  | 0.007 |
| Leucine rich repeat containing 33 (Lrrc33), mRNA                                        | BC027411  | -1.06 | 1.29  | 2.3   | 0.001 |
| Leupaxin                                                                                | BC026563  | -1.06 | 1.54  | 2.02  | 0.001 |
| Lymphocyte antigen 86 (Ly86), mRNA                                                      | NM_010745 | -1.04 | 1.49  | 2.89  | 0.001 |
| Lymphocyte cytosolic protein 1, mRNA (cDNA clone MGC:30234 IMAGE:3486993)               | NM_008879 | -1.04 | 1.02  | 2.28  | 0.001 |
| lysosomal-associated protein transmembrane 5                                            | BB218107  | -1.19 | 1.51  | 3.05  | 0.001 |
| Lysosomal-associated protein transmembrane 5, mRNA (cDNA clone MGC:13988 IMAGE:4037686) | U29539    | -1.12 | 1.39  | 2.66  | 0.001 |
| Lysyl oxidase, mRNA (cDNA clone MGC:11525 IMAGE:2655752)                                | M65143    | -1.09 | 1.62  | 3.15  | 0.001 |
| Lysyl oxidase-like 1, mRNA (cDNA clone MGC:46960 IMAGE:5251968)                         | BB667197  | -1.35 | 2.22  | 3.4   | 0.007 |
| Macrophage scavenger receptor 1 (Msr1), transcript variant 1, mRNA                      | L04274    | -2.08 | -1.75 | 3.85  | 0.001 |
| MARCKS-like 1, mRNA (cDNA clone MGC:6254 IMAGE:3257582)                                 | AV110584  | -1.05 | 1.24  | 3.17  | 0.001 |
| Matrix metalloproteinase 13 (Mmp13), mRNA                                               | NM_008607 | -1.15 | 3.25  | 21.37 | 0.001 |
| mediator complex subunit 13-like                                                        | AI562059  | -2.08 | -1.43 | -1.12 | 0.006 |
| Mitogen-activated protein kinase kinase kinase 3, mRNA                                  | BB129632  | -7.14 | -4    | -2.86 | 0.003 |

|                                                                                     |           |       |       |       |       |
|-------------------------------------------------------------------------------------|-----------|-------|-------|-------|-------|
| (cDNA clone IMAGE:3603090)                                                          |           |       |       |       |       |
| Mts1 gene                                                                           | D00208    | -1.03 | 1.71  | 2.47  | 0.001 |
| Mus musculus, clone IMAGE:3708675, mRNA, partial cds                                | BB765308  | -1.35 | 1.87  | 2.17  | 0.001 |
| Myosin IG, mRNA (cDNA clone IMAGE:1327573)                                          | BB235320  | -1.23 | 1.29  | 2.32  | 0.001 |
| Napsin A aspartic peptidase, mRNA (cDNA clone MGC:25302 IMAGE:4221844)              | AW105774  | -1.03 | 1.27  | 2.38  | 0.001 |
| NCK associated protein 1 like (Nckap1), mRNA                                        | BM238906  | -1.22 | 1.24  | 2.55  | 0.001 |
| Neuronal PAS domain protein 2 (Npas2), mRNA                                         | BG070037  | -2.08 | -1.64 | -1.54 | 0.004 |
| Neutrophil cytosolic factor 4, mRNA (cDNA clone MGC:36154 IMAGE:5321182)            | NM_008677 | -1.12 | 1.32  | 2.07  | 0.001 |
| Nicotinamide N-methyltransferase, mRNA (cDNA clone MGC:41160 IMAGE:1067421)         | AK006371  | -1.06 | 1.45  | 2.72  | 0.001 |
| Norepinephrine transporter (Slc6a2 gene)                                            | BB057781  | -2.7  | 3.41  | 4.26  | 0.003 |
| Nuclear factor, interleukin 3, regulated, mRNA (cDNA clone MGC:31040 IMAGE:5253195) | AY061760  | -1.67 | 0.84  | 6.02  | 0.001 |
| Paired immunoglobulin-like type 2 receptor beta 1 (Pilrb1), mRNA                    | NM_133209 | -1.06 | 1.3   | 2.11  | 0.001 |
| Paired related homeobox 1 (Prrx1), transcript variant 1, mRNA                       | L06502    | -3.23 | -2.7  | 1.46  | 0.008 |
| Pentraxin related gene, mRNA (cDNA clone MGC:13999 IMAGE:4012053)                   | NM_008987 | -1.15 | 1.81  | 20.73 | 0.001 |
| Peptidyl arginine deiminase, type IV (Padi4), mRNA                                  | NM_011061 | -1.52 | -1.35 | 2.73  | 0.003 |
| phosphatidylethanolamine binding protein 1                                          | AK008037  | -2.04 | -1.28 | 1.08  | 0.001 |
| Phospholipase A1 member A, mRNA (cDNA clone MGC:41255 IMAGE:1247206)                | NM_134102 | -1.03 | 1.41  | 3.01  | 0.001 |
| Phospholipase D family, member 4, mRNA (cDNA clone MGC:68329 IMAGE:6442038)         | BB210623  | -1.22 | 1.53  | 2.58  | 0.001 |
| Plasminogen activator, tissue, mRNA (cDNA clone MGC:18508 IMAGE:4038404)            | NM_008872 | -1.05 | 1.22  | 2.12  | 0.001 |
| Poliovirus receptor-related 4, mRNA (cDNA clone MGC:28105 IMAGE:3966993)            | BC024948  | -3.03 | 1.23  | 2.19  | 0.001 |

|                                                                                          |           |       |       |      |       |
|------------------------------------------------------------------------------------------|-----------|-------|-------|------|-------|
| Poly (ADP-ribose) polymerase family, member 8, mRNA (cDNA clone MGC:12129 IMAGE:3710450) | BC022679  | -1.14 | 1.48  | 2.02 | 0.001 |
| Polymeric immunoglobulin receptor 3 precursor (Pigr3)                                    | BM230330  | -1.16 | 1.17  | 3.05 | 0.001 |
| PREDICTED: Mus musculus hypothetical protein LOC100043636 (LOC100043636), mRNA           | BE688410  | -1.35 | -1.01 | 2.45 | 0.001 |
| PREDICTED: Mus musculus predicted gene, EG433637 (EG433637), mRNA                        | BB490675  | -4.35 | -1.47 | 1    | 0.001 |
| Prolactin induced protein, mRNA (cDNA clone MGC:18623 IMAGE:4165968)                     | BC018264  | -2.94 | -1.45 | 2.31 | 0.007 |
| Proline/serine-rich coiled-coil 1, mRNA (cDNA clone MGC:29281 IMAGE:3963608)             | NM_019976 | -2.17 | -1.05 | 1.25 | 0.006 |
| Prominin 2, mRNA (cDNA clone MGC:31164 IMAGE:4188940)                                    | AF269062  | -1.19 | 2.57  | 3.18 | 0.007 |
| Prostaglandin-endoperoxide synthase 2 (Ptgs2), mRNA                                      | M94967    | -1.43 | -1.14 | 3.06 | 0.001 |
| Protein tyrosine phosphatase, receptor type, C (Ptprc), transcript variant 2, mRNA       | NM_011210 | -1.11 | 1.55  | 2.68 | 0.001 |
| Protocadherin beta 20, mRNA (cDNA clone MGC:39006 IMAGE:5364116)                         | NM_053145 | -1.04 | 1.8   | 2.12 | 0.001 |
| RAB8B, member RAS oncogene family, mRNA (cDNA clone MGC:189796 IMAGE:9007296)            | BM214169  | 1     | 1.51  | 2.05 | 0.001 |
| Resistin like beta, mRNA (cDNA clone MGC:31267 IMAGE:4216606)                            | NM_023881 | -1.67 | -1.37 | 2.22 | 0.005 |
| Rho GTPase activating protein 15 (Arhgap15), transcript variant 1, mRNA                  | AK018058  | -1.14 | 1.41  | 2.26 | 0.001 |
| Rho, GDP dissociation inhibitor (GDI) beta, mRNA (cDNA clone MGC:25396 IMAGE:4923219)    | AK002516  | 1     | 1.15  | 2.41 | 0.001 |
| RIKEN cDNA 2310051M13 gene (2310051M13Rik), mRNA                                         | NM_027344 | -3.7  | -3.23 | 1.4  | 0.003 |
| RIKEN cDNA 2900034C19 gene                                                               | AK013612  | -1.32 | 1.6   | 2.69 | 0.005 |
| RIKEN cDNA 5830443L24 gene (5830443L24Rik), mRNA                                         | NM_029509 | 1     | 1.77  | 3.1  | 0.001 |
| RIKEN cDNA C130075A20 gene                                                               | AV320517  | -1.47 | -1.33 | 2.15 | 0.001 |
| Runt related transcription factor 3 (Runx3), mRNA                                        | AV233043  | -1.06 | 1.16  | 2.01 | 0.003 |

|                                                                            |           |       |       |       |       |
|----------------------------------------------------------------------------|-----------|-------|-------|-------|-------|
| SAM and SH3 domain containing 3 (Sash3), mRNA                              | AK004734  | -1.06 | 1.28  | 2.22  | 0.001 |
| SAM domain and HD domain, 1, mRNA (cDNA clone MGC:14068 IMAGE:4037046)     | BF148012  | -1.01 | 1.46  | 2.28  | 0.001 |
| Schlafen 2 (Slfn2), mRNA                                                   | NM_011408 | -1.08 | 1.36  | 3.47  | 0.001 |
| secreted frizzled-related sequence protein 1                               | BB497685  | -1.1  | 1.19  | 2.38  | 0.001 |
| Serglycin, mRNA (cDNA clone MGC:46886 IMAGE:5038568)                       | NM_011157 | -1.02 | 1.44  | 3.63  | 0.001 |
| SFFV proviral integration 1, mRNA (cDNA clone MGC:6158 IMAGE:3600260)      | NM_011355 | -1.1  | 1.13  | 2.05  | 0.001 |
| SH3-domain kinase binding protein 1 (Sh3kbp1), transcript variant 2, mRNA  | BB326929  | -1.04 | 1.31  | 2.14  | 0.001 |
| Small proline-rich protein 2I (Sprr2i), mRNA                               | NM_011475 | -2.94 | -1.69 | 3.98  | 0.002 |
| solute carrier family 28 (sodium-coupled nucleoside transporter), member 2 | NM_021520 | -1.02 | 1.33  | 2.17  | 0.001 |
| sperm associated antigen 4                                                 | AB041554  | -2.44 | 1.08  | 2.46  | 0.008 |
| Spondin 2, extracellular matrix protein (Spon2), mRNA                      | NM_133903 | -1.67 | 1.13  | 2.05  | 0.001 |
| Src-like adaptor, mRNA (cDNA clone MGC:41214 IMAGE:1430090)                | NM_009192 | -1.3  | 1.09  | 2.31  | 0.001 |
| STEAP family member 4 (Steap4), mRNA                                       | AY029778  | -1.11 | 1.2   | 3.66  | 0.001 |
| Strain C57BL/6J basilin                                                    | BB811788  | -1.12 | 1.08  | 2.79  | 0.001 |
| Strain SJL/J small inducible cytokine A4 (ScyA4)                           | AF128218  | -1.01 | 1.23  | 2.68  | 0.001 |
| T-cell receptor beta-chain mRNA, VDJ region, clone 7.9R.1F8                | AI021643  | -1.49 | 1.21  | 7.32  | 0.002 |
| Tenascin C (Tnc), mRNA                                                     | BB003393  | -1.06 | -1.02 | 2.24  | 0.001 |
| Tetraspanin 11 (Tspan11), mRNA                                             | BB535262  | -2.86 | 1.45  | 1.59  | 0.001 |
| TRAF-interacting protein with forkhead-associated domain (Tifa), mRNA      | BB277065  | -1.03 | 1.42  | 2.42  | 0.001 |
| Transcribed locus                                                          | AK016636  | -2    | 1.36  | 2.65  | 0.006 |
| Transcribed locus                                                          | AK016780  | -2.86 | 1.14  | 1.85  | 0.008 |
| Transcribed locus                                                          | BB357842  | -2.7  | -1.09 | -1.05 | 0.009 |
| Transcribed locus                                                          | AV215438  | -1.03 | 1.06  | 2.14  | 0.001 |
| Transcribed locus                                                          | BM239436  | -2.17 | 1.34  | 2.03  | 0.001 |



|                                                                                                                      |           |       |       |       |       |
|----------------------------------------------------------------------------------------------------------------------|-----------|-------|-------|-------|-------|
| Transcribed locus                                                                                                    | BM239715  | -1.69 | -1.11 | 2.87  | 0.001 |
| Transcribed locus                                                                                                    | BM224051  | -7.14 | -2.17 | 2.1   | 0.001 |
| Transcribed locus                                                                                                    | BB236216  | -1.16 | 1.32  | 2.53  | 0.001 |
| Transcribed locus, moderately similar to NP_001128309.1 trichorhinophalangeal syndrome I homolog [Rattus norvegicus] | BB136803  | -1.12 | 1.55  | 2.02  | 0.001 |
| Transcribed locus, strongly similar to XP_923280.1 PREDICTED: hypothetical protein LOC319470 [Mus musculus]          | BI133949  | -1.18 | 3.19  | 3.61  | 0.002 |
| Transcription factor EC (Tcfec), mRNA                                                                                | NM_031198 | -1.28 | 2.21  | 7.72  | 0.001 |
| Transmembrane protein 71, mRNA (cDNA clone MGC:143747 IMAGE:40092864)                                                | AV173260  | -1.64 | 1.6   | 2.24  | 0.001 |
| Triggering receptor expressed on myeloid cells-like 4, mRNA (cDNA clone MGC:169290 IMAGE:8860685)                    | BB740529  | -3.33 | 1.59  | 3.96  | 0.001 |
| Triggering receptor expressed on myeloid cells-like 6 (Trem16) mRNA, complete cds, alternatively spliced             | BB134165  | -1.96 | -1.25 | 8.59  | 0.001 |
| Tryptophane aspartate-containing coat protein (Coro1a)                                                               | BB740218  | -1.89 | 2.14  | 4.11  | 0.001 |
| Tubulin, alpha 8, mRNA (cDNA clone MGC:28850 IMAGE:4507364)                                                          | NM_017379 | -1.12 | 3.68  | 4.43  | 0.002 |
| Tumor necrosis factor, alpha-induced protein 8-like 2 (Tnfaip8l2), mRNA                                              | AK007540  | -1.1  | 1.31  | 2.12  | 0.004 |
| Twist homolog 2 (Drosophila) (Twist2), mRNA                                                                          | NM_007855 | -1.03 | 1.53  | 2.48  | 0.002 |
| Type I membrane receptor SLAMF1 (Slam)                                                                               | BB132695  | -2.78 | -2.27 | -1.28 | 0.005 |
| Type II deiodinase                                                                                                   | AF177196  | -1.18 | 1.16  | 4.87  | 0.001 |
| Ubiquitin specific protease UBP43                                                                                    | NM_011909 | -1.04 | 1.14  | 2.27  | 0.002 |
| Versican (Vcan), transcript variant 2, mRNA                                                                          | NM_019389 | -1.27 | 1.14  | 2.68  | 0.001 |
| V-set domain containing T cell activation inhibitor 1, mRNA (cDNA clone MGC:41287 IMAGE:1477676)                     | BB551556  | -5.88 | -4.35 | -3.85 | 0.008 |

**(-) represents fold down regulation from day 0 control.**
