# Supplementary material
Source: PubMed Central journal article supplement (PMC3026350)
Supplement: tableS4.pdf [file tableS4.pdf]

**Table D: D0>D2>D4>D6**

| Gene Title                                                                                                                     | Gene Identifier | D2/D0 | D4/D0 | D6/D0 | P     |
|--------------------------------------------------------------------------------------------------------------------------------|-----------------|-------|-------|-------|-------|
| 4-aminobutyrate aminotransferase, mRNA (cDNA clone IMAGE:30532686)                                                             | BF462185        | -1.01 | -1.03 | -2.13 | 0.001 |
| 5' nucleotidase, ecto (Nt5e), mRNA                                                                                             | NM_011851       | -1.47 | -1.64 | -2.13 | 0.003 |
| A kinase (PRKA) anchor protein (yotiao) 9 (Akap9), mRNA                                                                        | C79026          | -2.22 | -3.7  | -4.35 | 0.003 |
| ABO blood group (transferase A, alpha 1-3-N-acetylgalactosaminyltransferase, transferase B, alpha 1-3-galactosyltransferase)   | NM_030718       | -1.09 | -1.39 | -2.13 | 0.001 |
| Actin-binding LIM protein 1, mRNA (cDNA clone IMAGE:5323557)                                                                   | AK011936        | -1.59 | -2    | -2.17 | 0.001 |
| Activin A receptor, type IC, mRNA (cDNA clone IMAGE:1196242)                                                                   | BB432539        | -1.54 | -1.72 | -2.27 | 0.001 |
| Adducin 3 (gamma), mRNA (cDNA clone MGC:46880 IMAGE:4506748)                                                                   | BI410363        | -1.3  | -1.67 | -2.04 | 0.001 |
| ADP-ribosylation factor guanine nucleotide-exchange factor 2 (brefeldin A-inhibited), mRNA (cDNA clone MGC:189963 IMAGE:90881) | BB242531        | -1.43 | -1.54 | -9.09 | 0.006 |
| Aldehyde dehydrogenase 2, mitochondrial, mRNA (cDNA clone MGC:6764 IMAGE:3600875)                                              | BB513627        | -1.69 | -1.89 | -3.23 | 0.001 |
| Amiloride binding protein 1 (amine oxidase, copper-containing) (Abp1), mRNA                                                    | BC021880        | -1.02 | -1.09 | -2.27 | 0.001 |
| Ankyrin 3, epithelial (Ank3), transcript variant 2, mRNA                                                                       | BC021657        | -1.06 | -1.39 | -2    | 0.001 |
| Aquaporin 4, mRNA (cDNA clone MGC:37514 IMAGE:4985265)                                                                         | U48399          | -2.08 | -2.44 | -2.5  | 0.002 |
| Aquaporin 8, mRNA (cDNA clone MGC:13894 IMAGE:4224850)                                                                         | NM_007474       | -1.33 | -2.17 | -2.33 | 0.002 |
| ATPase, Ca <sup>++</sup> transporting, ubiquitous, mRNA (cDNA clone MGC:13968 IMAGE:4191458)                                   | NM_016745       | -1.1  | -2.04 | -2.33 | 0.001 |
| ATP-binding cassette, sub-family C (CFTR/MRP), member 6 (Abcc6), mRNA                                                          | NM_018795       | -1.06 | -1.32 | -2.44 | 0.006 |
| AVL9 homolog ( <i>S. cerevisiae</i> ), mRNA (cDNA clone MGC:143982 IMAGE:40095961)                                             | BB815600        | -1.19 | -1.82 | -2.04 | 0.001 |

|                                                                                                      |           |       |       |       |       |
|------------------------------------------------------------------------------------------------------|-----------|-------|-------|-------|-------|
| Calcineurin binding protein 1, mRNA (cDNA clone MGC:183736 IMAGE:9087736)                            | BG071186  | -1.05 | -2.56 | -4.55 | 0.007 |
| Calcium/calmodulin-dependent protein kinase ID, mRNA (cDNA clone IMAGE:5052777)                      | BG071931  | -1.47 | -2.5  | -3.13 | 0.001 |
| Calmin (Clmn), transcript variant 1, mRNA                                                            | BE980727  | -1.09 | -1.89 | -3.03 | 0.003 |
| Carbamoyl-phosphate synthetase 1 (Cps1), nuclear gene encoding mitochondrial protein, mRNA           | AV239350  | -1.43 | -1.59 | -4.17 | 0.003 |
| Carcinoembryonic antigen-related cell adhesion molecule 10, mRNA (cDNA clone MGC:6052 IMAGE:3481822) | NM_007675 | -1.01 | -1.43 | -2.17 | 0.001 |
| Casitas B-lineage lymphoma (Cbl), mRNA                                                               | NM_007619 | -1.52 | -2.78 | -2.86 | 0.001 |
| CDNA clone IMAGE:40087485                                                                            | BB125269  | -1.15 | -1.32 | -2.08 | 0.001 |
| CDNA clone IMAGE:40099060                                                                            | AI594683  | -1.33 | -1.56 | -2.38 | 0.008 |
| CDNA clone IMAGE:40109782                                                                            | BB305930  | -1.37 | -1.79 | -2.7  | 0.001 |
| CDNA fis, clone TRACH2014284, highly similar to MEPRIN A ALPHA-SUBUNIT PRECURSOR (EC 3.4.24.18)      | AI098089  | -1.25 | -2.22 | -2.33 | 0.001 |
| Centrosomal protein 57 (Cep57), mRNA                                                                 | AW457682  | -1.59 | -2    | -2.22 | 0.001 |
| Chloride channel calcium activated 3, mRNA (cDNA clone MGC:13795 IMAGE:4217548)                      | AV373372  | -1.15 | -2    | -2.94 | 0.002 |
| Chromodomain helicase DNA binding protein 7, mRNA (cDNA clone IMAGE:4007312)                         | BB127276  | -1.89 | -2.33 | -2.86 | 0.002 |
| Cyclin D2 (Cend2), mRNA                                                                              | NM_009829 | -1.23 | -1.49 | -2.27 | 0.002 |
| Cyclophilin-related protein                                                                          | BB317504  | -1.56 | -2.86 | -4    | 0.001 |
| Cystic fibrosis transmembrane conductance regulator homolog (Cfr), mRNA                              | X72693    | -1.37 | -2.56 | -2.56 | 0.001 |
| Cytochrome c oxidase, subunit VIIa 1 (Cox7a1), mRNA                                                  | AF037370  | -1.18 | -1.27 | -2.38 | 0.001 |
| Cytochrome P450, family 2, subfamily d, polypeptide 13, mRNA (cDNA clone IMAGE:4194968)              | BC018344  | -1.1  | -1.25 | -2.63 | 0.002 |
| Cytochrome P450, family 2, subfamily s, polypeptide 1, mRNA (cDNA clone IMAGE:4165737)               | AK004699  | -1.08 | -1.18 | -2    | 0.001 |

|                                                                                               |           |       |       |       |       |
|-----------------------------------------------------------------------------------------------|-----------|-------|-------|-------|-------|
| Cytoplasmic FMR1 interacting protein 1, mRNA (cDNA clone IMAGE:3486930)                       | AW121530  | -1.16 | -2.94 | -7.69 | 0.003 |
| DEAD/H (Asp-Glu-Ala-Asp/His) box polypeptide 26B, mRNA (cDNA clone IMAGE:4016860)             | BM239943  | -1.45 | -2.17 | -2.78 | 0.007 |
| Deiodinase, iodothyronine, type I, mRNA (cDNA clone IMAGE:5098167)                            | NM_007860 | -1.02 | -1.39 | -2.5  | 0.001 |
| DNA segment, Chr 3, ERATO Doi 254, expressed (D3Ertd254e), mRNA                               | AU067741  | -1.33 | -2.08 | -2.33 | 0.001 |
| DNA segment, Chr 3, ERATO Doi 751, expressed (D3Ertd751e), transcript variant 1, mRNA         | AK012700  | -1.45 | -2.33 | -2.5  | 0.001 |
| DNA segment, Chr 6, Miriam Meisler 5, expressed (D6Mm5e), mRNA                                | NM_033079 | -1.22 | -2.44 | -4.17 | 0.003 |
| DnaJ (Hsp40) homolog, subfamily C, member 5 gamma, mRNA (cDNA clone MGC:107182 IMAGE:6774833) | BB667162  | -1.45 | -2.56 | -3.57 | 0.009 |
| Dopa decarboxylase (Ddc), mRNA                                                                | AF071068  | -1.22 | -1.25 | -2.33 | 0.001 |
| Dopey family member 1, mRNA (cDNA clone IMAGE:5028632)                                        | BB536138  | -1.56 | -2.94 | -2.94 | 0.007 |
| ELOVL family member 7, elongation of long chain fatty acids (yeast) (Elovl7), mRNA            | BC005602  | -1.52 | -2.13 | -2.63 | 0.001 |
| Erythrocyte protein band 4.1-like 1, mRNA (cDNA clone MGC:36001 IMAGE:4954660)                | NM_013510 | -1.22 | -1.23 | -3.57 | 0.001 |
| Ese2 protein                                                                                  | AI326108  | -1.52 | -1.75 | -2    | 0.002 |
| ESTs                                                                                          | AI507322  | -1.27 | -1.32 | -2.08 | 0.004 |
| ESTs                                                                                          | BG071183  | -1.32 | -1.41 | -2.38 | 0.002 |
| ESTs                                                                                          | AI426376  | -1.43 | -1.92 | -2    | 0.001 |
| ESTs                                                                                          | BM206269  | -1.39 | -1.96 | -2.38 | 0.007 |
| ESTs                                                                                          | AV239969  | -1.27 | -1.61 | -3.33 | 0.001 |
| ESTs                                                                                          | BB481523  | -1.56 | -2.22 | -2.33 | 0.006 |
| ESTs                                                                                          | BB535418  | -1.82 | -2.33 | -3.33 | 0.001 |
| ESTs                                                                                          | BE692322  | -1.25 | -3.45 | -5    | 0.008 |

|                                                                                          |           |       |       |       |       |
|------------------------------------------------------------------------------------------|-----------|-------|-------|-------|-------|
| ESTs                                                                                     | BG069908  | -1.3  | -3.85 | -4.35 | 0.001 |
| ESTs                                                                                     | BB245373  | -1.69 | -4.55 | -4.55 | 0.001 |
| ESTs                                                                                     | BG066335  | -1.49 | -5.26 | -6.67 | 0.006 |
| expressed sequence AA517631                                                              | AA511281  | -1.41 | -4.17 | -5.26 | 0.005 |
| expressed sequence C85328                                                                | BG067157  | -1.06 | -1.23 | -2.86 | 0.001 |
| Family with sequence similarity 134, member B, mRNA (cDNA clone MGC:28735 IMAGE:4460992) | NM_025459 | 1     | -1.35 | -2.27 | 0.001 |
| Fatty acid desaturase (Scd3)                                                             | BG060909  | -1.39 | -1.96 | -2.13 | 0.001 |
| F-box protein 32, mRNA (cDNA clone MGC:25730 IMAGE:3981597)                              | AF441120  | -1.43 | -1.82 | -2.22 | 0.002 |
| FGFR1 oncogene partner 2, mRNA (cDNA clone MGC:25495 IMAGE:4504364)                      | AB041650  | -1.75 | -2.7  | -2.94 | 0.001 |
| Forkhead box A2 (Foxa2), mRNA                                                            | NM_010446 | -1.15 | -1.37 | -2.56 | 0.001 |
| Forkhead box P1 (Foxp1), mRNA                                                            | BB554776  | -1.67 | -1.96 | -2.44 | 0.001 |
| Four and a half LIM domains 1, mRNA (cDNA clone MGC:32284 IMAGE:5012394)                 | BF466856  | -1.45 | -1.56 | -2.63 | 0.001 |
| FXYD domain-containing ion transport regulator 4 (Fxyd4), mRNA                           | NM_033648 | -1.14 | -1.15 | -3.33 | 0.009 |
| Gamma-glutamyl hydrolase, mRNA (cDNA clone MGC:13786 IMAGE:4223953)                      | NM_010281 | -1.19 | -1.27 | -2    | 0.003 |
| Gap junction protein, beta 1, mRNA (cDNA clone MGC:6217 IMAGE:3483365)                   | BC026833  | -1.16 | -1.82 | -2.33 | 0.001 |
| Golgi autoantigen, golgin subfamily a, 1, mRNA (cDNA clone IMAGE:4503915)                | BC024637  | -1.28 | -1.49 | -2.17 | 0.004 |
| Hedgehog-interacting protein (Hhip), mRNA                                                | BB088162  | -1.47 | -1.59 | -3.57 | 0.001 |
| histone cluster 1, H4j                                                                   | AK010085  | -1.25 | -1.56 | -2.08 | 0.001 |
| HNF1 homeobox B, mRNA (cDNA clone MGC:32464 IMAGE:5044299)                               | AB008174  | -1.18 | -1.56 | -2.04 | 0.001 |
| Inter-alpha (globulin) inhibitor H5, mRNA (cDNA clone MGC:70205 IMAGE:3490706)           | AI317339  | -1.28 | -1.85 | -3.57 | 0.001 |

|                                                                                                          |           |       |       |       |       |
|----------------------------------------------------------------------------------------------------------|-----------|-------|-------|-------|-------|
| Interferon regulatory factor 3 (Irf3), mRNA                                                              | BB668007  | -2.04 | -2.27 | -2.38 | 0.002 |
| Junction-mediating and regulatory protein, mRNA (cDNA clone IMAGE:3991085)                               | BC020052  | -1.39 | -3.13 | -8.33 | 0.007 |
| Kelch-like 24 (Drosophila) (Klhl24), mRNA                                                                | BB328076  | -1.49 | -1.49 | -2.33 | 0.001 |
| Kruppel-like factor 12 (Klf12), mRNA                                                                     | BM249597  | -2    | -2.13 | -2.63 | 0.001 |
| Lacrimal androgen-binding protein delta (Abpd)                                                           | AF272844  | -1.39 | -3.13 | -6.25 | 0.003 |
| LanC lantibiotic synthetase component C-like 3 (bacterial), mRNA (cDNA clone IMAGE:40060880)             | BB811311  | -1.06 | -3.45 | -3.57 | 0.004 |
| Leucine-rich and immunoglobulin-like domains 3 (Lrig3)                                                   | BB524113  | -1.02 | -1.18 | -2.04 | 0.001 |
| Lipolysis stimulated lipoprotein receptor, mRNA (cDNA clone MGC:7815 IMAGE:3500090)                      | BC004672  | -1.3  | -1.33 | -2.22 | 0.001 |
| Mannoside acetylglucosaminyltransferase 3 (Mgat3), mRNA                                                  | NM_010795 | -1.11 | -2.04 | -2.22 | 0.001 |
| Metastasis associated lung adenocarcinoma transcript 1 (non-coding RNA), mRNA (cDNA clone IMAGE:3582796) | BF537798  | -2.13 | -4.35 | -5.56 | 0.004 |
| Methyltransferase like 7A, mRNA (cDNA clone IMAGE:4235088)                                               | NM_027334 | -1.37 | -1.82 | -2.86 | 0.001 |
| Microtubule-associated protein 7 (Mtap7), mRNA                                                           | AK008018  | -1.52 | -2.08 | -2.38 | 0.001 |
| Mitochondrial ribosomal protein L51, mRNA (cDNA clone MGC:35735 IMAGE:5344672)                           | AI594880  | -1.49 | -2.17 | -2.27 | 0.001 |
| Mitochondrial ribosomal protein S6 (Mrps6), nuclear gene encoding mitochondrial protein, mRNA            | AV245536  | -1.32 | -1.75 | -2.04 | 0.001 |
| Neuralized homolog 3 homolog (Drosophila) (Neur13), mRNA                                                 | AW610818  | -1.3  | -2.17 | -2.78 | 0.001 |
| Neurotrimin, mRNA (cDNA clone MGC:30504 IMAGE:4480983)                                                   | AF282980  | -3.33 | -3.33 | -4.35 | 0.006 |
| Nuclear receptor subfamily 5, group A, member 2 (Nr5a2), mRNA                                            | NM_030676 | -1.43 | -1.96 | -2.7  | 0.001 |
| Odd Oz/ten-m homolog 4 (Drosophila) (Odz4), mRNA                                                         | BG071076  | -1.82 | -1.96 | -2.63 | 0.001 |
| Ovo-like 2 (Drosophila) (Ovol2), transcript variant B, mRNA                                              | NM_026924 | -1.18 | -1.28 | -2.08 | 0.001 |
| Peptidase M20 domain containing 1, mRNA (cDNA clone IMAGE:5124369)                                       | BC025830  | -1.06 | -1.14 | -3.45 | 0.001 |
| Peroxiredoxin 6, mRNA (cDNA clone MGC:19131 IMAGE:4215591)                                               | AW319648  | -1.61 | -2.17 | -3.13 | 0.002 |

|                                                                                                    |           |       |       |       |       |
|----------------------------------------------------------------------------------------------------|-----------|-------|-------|-------|-------|
| Peroxisome proliferative activated receptor, gamma, coactivator 1 alpha (Ppargc1a), mRNA           | BB745167  | -1.64 | -2.86 | -5.56 | 0.001 |
| Peroxisome proliferator activated receptor alpha, mRNA (cDNA clone MGC:18607 IMAGE:4222384)        | AV282267  | -1.18 | -1.82 | -2.17 | 0.001 |
| PH domain and leucine rich repeat protein phosphatase-like (Phlpp1), mRNA                          | AW542144  | -1.25 | -1.33 | -2    | 0.003 |
| Phenazine biosynthesis-like protein domain containing (Pbld), mRNA                                 | BC019997  | -1.18 | -1.3  | -3.13 | 0.007 |
| Phosphodiesterase 4D interacting protein (myomegalin), mRNA (cDNA clone IMAGE:4954590)             | AI639670  | -1.19 | -1.85 | -2.22 | 0.001 |
| Phosphoenolpyruvate carboxykinase 1, cytosolic, mRNA (cDNA clone MGC:46881 IMAGE:4973187)          | AW106963  | -1.11 | -1.39 | -3.33 | 0.001 |
| Phosphomannomutase 2, mRNA (cDNA clone IMAGE:5352533)                                              | BB709170  | -1.72 | -3.33 | -4.17 | 0.001 |
| PREDICTED: Mus musculus hypothetical protein LOC100039892 (LOC100039892), mRNA                     | BM196962  | -1.37 | -1.49 | -2.04 | 0.001 |
| PREDICTED: Mus musculus predicted gene, EG664949 (EG664949), misc RNA                              | BG071399  | -1.56 | -1.72 | -2.5  | 0.006 |
| PREDICTED: Mus musculus RIKEN cDNA 5430427M07 gene (5430427M07Rik), mRNA                           | AK017349  | -1.28 | -2.56 | -4    | 0.001 |
| Prostaglandin E receptor 4 (subtype EP4), mRNA (cDNA clone MGC:18490 IMAGE:4037704)                | NM_008965 | -1.59 | -1.72 | -2.08 | 0.001 |
| Protein geranylgeranyltransferase type I, beta subunit, mRNA (cDNA clone MGC:175982 IMAGE:9055633) | BI107300  | -1.33 | -1.75 | -2.27 | 0.001 |
| Protein kinase C, zeta (Prkcz), transcript variant 1, mRNA                                         | BB430502  | -1.02 | -1.2  | -2.04 | 0.001 |
| Protein kinase, cAMP dependent, catalytic, beta (Prkacb), mRNA                                     | AV024339  | -1.25 | -1.56 | -2.08 | 0.001 |
| RAB4B, member RAS oncogene family (Rab4b), mRNA                                                    | NM_019394 | -1.16 | -1.23 | -3.57 | 0.001 |
| Receptor (calcitonin) activity modifying protein 2 (Ramp2), mRNA                                   | AF146523  | -2.38 | -4    | -4.76 | 0.001 |
| Regenerating islet-derived family, member 4, mRNA (cDNA clone MGC:28598 IMAGE:4216795)             | NM_026328 | -1.11 | -1.25 | -4.55 | 0.001 |
| Regulator of G-protein signaling 17 (Rgs17), mRNA                                                  | NM_019958 | -1.33 | -1.89 | -2.56 | 0.001 |

|                                                                                                        |           |       |       |       |       |
|--------------------------------------------------------------------------------------------------------|-----------|-------|-------|-------|-------|
| Replication initiator 1 (Repin1), transcript variant 1, mRNA                                           | BE986062  | -1.28 | -2.78 | -5.56 | 0.003 |
| Rho-guanine nucleotide exchange factor (Rgnef), mRNA                                                   | BG069493  | -1.67 | -2.27 | -3.57 | 0.001 |
| Rhomboid, veinlet-like 2 (Drosophila), mRNA (cDNA clone IMAGE:40100896)                                | BM120331  | -1.25 | -1.39 | -2.04 | 0.001 |
| RIKEN cDNA 1700016K19 gene (1700016K19Rik), mRNA                                                       | AV260052  | -1.28 | -1.49 | -3.33 | 0.005 |
| RIKEN cDNA 2010110P09 gene (2010110P09Rik), mRNA                                                       | AK008392  | -1.37 | -1.96 | -2.27 | 0.001 |
| RNA binding motif protein 5 (Rbm5), mRNA                                                               | BE446879  | -1.39 | -2    | -2.13 | 0.001 |
| Small nuclear ribonucleoprotein 70 (U1), mRNA (cDNA clone IMAGE:3486572)                               | BI689977  | -1.56 | -2.44 | -2.63 | 0.001 |
| Solute carrier family 12, member 2 (Slc12a2), mRNA                                                     | BG069505  | -1.32 | -1.69 | -2.17 | 0.001 |
| Solute carrier family 15 (oligopeptide transporter), member 1 (Slc15a1), mRNA                          | NM_053079 | 1     | -1.45 | -2.44 | 0.006 |
| Solute carrier family 26 (sulfate transporter), member 2, mRNA (cDNA clone MGC:14061 IMAGE:4014785)    | NM_007885 | -1.2  | -2.08 | -2.78 | 0.001 |
| Solute carrier family 26, member 3, mRNA (cDNA clone IMAGE:4989186)                                    | BC022639  | -1.05 | -1.75 | -2.78 | 0.001 |
| Solute carrier family 34 (sodium phosphate), member 2 (Slc34a2), mRNA                                  | NM_011402 | -1.69 | -2.04 | -2.17 | 0.001 |
| Solute carrier family 37 (glycerol-3-phosphate transporter), member 2, mRNA (cDNA clone IMAGE:4913507) | BC022752  | -1.39 | -1.56 | -4.35 | 0.001 |
| Solute carrier family 4 (anion exchanger), member 4, mRNA (cDNA clone IMAGE:4973987)                   | BE655147  | -1.3  | -2.13 | -2.13 | 0.002 |
| Special AT-rich sequence binding protein 2 (Satb2), mRNA                                               | AF319623  | -1.05 | -1.69 | -2.08 | 0.001 |
| Spermatid perinuclear RNA binding protein, mRNA (cDNA clone MGC:25337 IMAGE:4502840)                   | BB296225  | -1.25 | -1.92 | -3.45 | 0.001 |
| splicing factor, arginine/serine-rich 8                                                                | BC025219  | -1.39 | -2.04 | -2.08 | 0.001 |
| Sprouty-related, EVH1 domain containing 2, mRNA (cDNA clone IMAGE:4946146)                             | BB133520  | -1.52 | -2.86 | -2.94 | 0.001 |
| ST3 beta-galactoside alpha-2,3-sialyltransferase 4, mRNA (cDNA clone MGC:6096 IMAGE:3497996)           | AB061305  | -1.2  | -1.52 | -2.13 | 0.007 |

|                                                                                                                                |           |       |       |       |       |
|--------------------------------------------------------------------------------------------------------------------------------|-----------|-------|-------|-------|-------|
| ST3 beta-galactoside alpha-2,3-sialyltransferase 6, mRNA (cDNA clone IMAGE:1329116)                                            | NM_018784 | -1.25 | -1.39 | -3.23 | 0.001 |
| ST6 (alpha-N-acetyl-neuraminyl-2,3-beta-galactosyl-1,3)-N-acetylgalactosaminide alpha-2,6-sialyltransferase 2                  | BC010208  | -1.09 | -1.23 | -2.13 | 0.001 |
| Sulfotransferase family, cytosolic, 1C, member 2, mRNA (cDNA clone MGC:31323 IMAGE:4223678)                                    | NM_026935 | -1.01 | -1.05 | -2    | 0.001 |
| Synaptic nuclear envelope 1 (Syne1), transcript variant 1, mRNA                                                                | NM_022027 | -1.64 | -1.72 | -3.13 | 0.001 |
| Syncollin (Syncn), mRNA                                                                                                        | BC019567  | 1     | -1.12 | -3.33 | 0.001 |
| TATA box binding protein (Tbp)-associated factor, RNA polymerase I, D (Taf1d), transcript variant 2, mRNA                      | AV167760  | -1.45 | -2.08 | -2.17 | 0.006 |
| Testis-specific expressed protein 2                                                                                            | BF018978  | -1.59 | -1.75 | -5.88 | 0.002 |
| Transcribed locus                                                                                                              | AK017575  | -1.56 | -1.69 | -3.33 | 0.001 |
| Transcribed locus                                                                                                              | AW910499  | -1.35 | -1.52 | -2.5  | 0.001 |
| Transcribed locus                                                                                                              | AV174556  | -1.33 | -2.27 | -2.94 | 0.001 |
| Transcribed locus                                                                                                              | BB475442  | -1.79 | -4.55 | -7.14 | 0.003 |
| Transcribed locus                                                                                                              | BI465649  | -1.69 | -1.89 | -4.17 | 0.001 |
| Transcribed locus                                                                                                              | BB476118  | -1.67 | -3.57 | -5    | 0.002 |
| Transcribed locus                                                                                                              | BB703414  | -1.12 | -1.3  | -2.27 | 0.001 |
| Transcribed locus                                                                                                              | BB202278  | -1.15 | -1.45 | -4    | 0.002 |
| Transcribed locus                                                                                                              | BG075346  | -1.22 | -1.41 | -2.27 | 0.002 |
| Transcribed locus                                                                                                              | BF465664  | -1.59 | -2.86 | -3.85 | 0.001 |
| Transcribed locus                                                                                                              | BB153741  | -1.52 | -1.82 | -5.88 | 0.002 |
| Transcribed locus, moderately similar to NP_058796.1 polo-like kinase 1 [Rattus norvegicus]                                    | BG966688  | -1.04 | -1.13 | -2.22 | 0.001 |
| Transcribed locus, moderately similar to XP_001064981.1 PREDICTED: similar to ribonuclease/angiogenin inhibitor 1 [Rattus nor] | BB704012  | -1.03 | -1.67 | -3.23 | 0.001 |
| Transcribed locus, strongly similar to XP_001472420.1 PREDICTED: hypothetical protein [Mus musculus]                           | AK014661  | -1.22 | -1.72 | -2.17 | 0.003 |



|                                                                                                            |           |       |       |       |       |
|------------------------------------------------------------------------------------------------------------|-----------|-------|-------|-------|-------|
| Transcribed locus, strongly similar to XP_484566.1 PREDICTED: hypothetical protein LOC69699 [Mus musculus] | AK010217  | -2.5  | 3.33  | -5.56 | 0.001 |
| Transcribed locus, strongly similar to XP_620545.1 PREDICTED: hypothetical protein LOC77700 [Mus musculus] | AI506672  | -1.2  | -1.22 | -2.44 | 0.001 |
| Transcription factor 25 (basic helix-loop-helix), mRNA (cDNA clone MGC:36794 IMAGE:3498003)                | BE988778  | -1.45 | -2.17 | -2.17 | 0.001 |
| Transcription factor 3 (Tcf3), transcript variant 2, mRNA                                                  | NM_009332 | 1     | -1.01 | -2.08 | 0.001 |
| Transglutaminase 3, E polypeptide (Tgm3), mRNA                                                             | AI893889  | -1.25 | -1.35 | -3.57 | 0.002 |
| Transient receptor potential cation channel, subfamily M, member 6 (Trpm6), mRNA                           | BM213868  | -1.59 | -1.75 | -3.7  | 0.001 |
| Transthyretin, mRNA (cDNA clone MGC:18651 IMAGE:4192268)                                                   | BC024702  | -1.52 | -1.59 | -6.25 | 0.001 |
| Tripartite motif-containing 2 (Trim2), mRNA                                                                | BB283676  | -1.28 | -2    | -2.38 | 0.001 |
| Tripartite motif-containing 24, mRNA (cDNA clone IMAGE:5150949)                                            | BB325847  | -1.41 | -1.96 | -2.33 | 0.002 |
| Troponin I, skeletal, slow 1, mRNA (cDNA clone MGC:35867 IMAGE:4949804)                                    | NM_021467 | -1.06 | -1.19 | -2.94 | 0.001 |
| Ubiquitin specific peptidase 50 (Usp50), mRNA                                                              | BB215201  | -1.16 | -1.61 | -2.38 | 0.001 |
| UDP-N-acetyl-alpha-D-galactosamine: polypeptide N-acetylgalactosaminyltransferase 7 (Galnt7), mRNA         | AF349573  | -1.04 | -1.89 | -2    | 0.001 |
| WNK lysine deficient protein kinase 1, mRNA (cDNA clone IMAGE:5371931)                                     | BI692255  | -1.96 | -3.13 | -3.45 | 0.001 |
| Xenotropic and polytropic retrovirus receptor 1, mRNA (cDNA clone IMAGE:4506466)                           | AF131102  | -1.43 | -2.26 | -2.7  | 0.001 |
| Yip1 domain family, member 1 (Yipf1), mRNA                                                                 | AV337352  | -1.32 | -2.17 | -3.13 | 0.008 |
| Zinc finger and BTB domain containing 7a (Zbtb7a), mRNA                                                    | NM_010731 | -1.69 | -3.33 | -4.17 | 0.001 |
| Zinc finger protein 292, mRNA (cDNA clone IMAGE:3493868)                                                   | AK017652  | -1.39 | -2.32 | -2.44 | 0.002 |
| Zinc finger protein 704 (Zfp704), mRNA                                                                     | AW413620  | -1.92 | -3.13 | -6.25 | 0.001 |
| Zinc finger protein 775, mRNA (cDNA clone MGC:176184 IMAGE:9055835)                                        | BB667577  | -1.23 | -1.3  | -2.08 | 0.001 |

**(-) represents fold down regulation from day 0 control.**
