# Supplementary material
Source: PubMed Central journal article supplement (PMC3026350)
Supplement: tableS5.pdf [file tableS5.pdf]

**Table E: D0<D2>D4<D6**

| Gene Title                                                                                                                   | Gene Identifier | D2/D0 | D4/D0 | D6/D0 | P     |
|------------------------------------------------------------------------------------------------------------------------------|-----------------|-------|-------|-------|-------|
| 2'-5' oligoadenylate synthetase 2 (Oas2), mRNA                                                                               | AB067535        | 1.27  | 1.04  | 2.51  | 0.001 |
| A disintegrin-like and metallopeptidase (reprolysin type) with thrombospondin type 1 motif, 1 (Adamts1), mRNA                | D67076          | 1.3   | 1.3   | 3.15  | 0.001 |
| ADP-ribosylation factor 3, mRNA (cDNA clone MGC:28115 IMAGE:3969152)                                                         | NM_007478       | 1.06  | -2.08 | -1.45 | 0.003 |
| Adrenergic receptor, alpha 2a (Adra2a), mRNA                                                                                 | NM_007417       | 1.04  | -2.04 | -1.33 | 0.001 |
| Aldehyde dehydrogenase family 1, subfamily A3, mRNA (cDNA clone IMAGE:5005066)                                               | BC026667        | 2.05  | 1.52  | 6.17  | 0.003 |
| Angiopoietin-like 4, mRNA (cDNA clone MGC:35885 IMAGE:5137159)                                                               | NM_020581       | 1.15  | -1.02 | 3.39  | 0.001 |
| apoptosis inhibitory protein 5                                                                                               | BB813983        | 3.76  | -1.3  | 2.84  | 0.004 |
| Basic helix-loop-helix family, member e22 (Bhlhe22), mRNA                                                                    | NM_021560       | 1.46  | 1.22  | 3.61  | 0.006 |
| Bradykinin receptor, beta 1 (Bdkrb1), mRNA                                                                                   | NM_007539       | 1.05  | 1     | 2.18  | 0.001 |
| Butyrophilin-like 2, mRNA (cDNA clone MGC:176064 IMAGE:9055715)                                                              | BE634596        | 1.96  | -1.41 | 2.03  | 0.002 |
| Capping protein (actin filament), gelsolin-like, mRNA (cDNA clone MGC:28153 IMAGE:3983574)                                   | NM_007599       | 1.41  | 1.19  | 2.33  | 0.001 |
| Carbamoyl-phosphate synthetase 2, aspartate transcarbamylase, and dihydroorotase, mRNA (cDNA clone MGC:178528 IMAGE:9053520) | BE980696        | 3     | 2.89  | 3.23  | 0.003 |
| Carboxylesterase 8 (putative) (Ces8), mRNA                                                                                   | BC026374        | 1.5   | 1.15  | 2.53  | 0.001 |
| CD163 antigen (Cd163), mRNA                                                                                                  | NM_053094       | 1.18  | 1.14  | 2.39  | 0.003 |
| CDNA clone IMAGE:3327421                                                                                                     | AI451488        | 2.99  | 1.32  | 2.8   | 0.003 |
| CDNA sequence BC025446, mRNA (cDNA clone MGC:29251 IMAGE:5053382)                                                            | BC025446        | 1.34  | 1.01  | 2.42  | 0.003 |
| Chemokine (C-X-C motif) ligand 11, mRNA (cDNA clone MGC:32375 IMAGE:5035983)                                                 | NM_019494       | 1.17  | 1.15  | 2.39  | 0.008 |

|                                                                                      |           |      |       |       |       |
|--------------------------------------------------------------------------------------|-----------|------|-------|-------|-------|
| Chemokine (C-X-C motif) ligand 16, mRNA (cDNA clone MGC:28190 IMAGE:3988542)         | BC019961  | 1.19 | 1.06  | 2.01  | 0.001 |
| Coagulation factor X, mRNA (cDNA clone MGC:6641 IMAGE:3495496)                       | NM_007972 | 1.5  | -1.92 | 3.63  | 0.001 |
| Colony stimulating factor 3 (granulocyte) (Csf3), mRNA                               | NM_009971 | 1.9  | -1.16 | 7.1   | 0.001 |
| Complement component 5a receptor 1 (C5ar1), mRNA                                     | NM_007577 | 1.32 | 1.16  | 2.94  | 0.001 |
| C-type lectin domain family 4, member d (Clec4d), mRNA                               | NM_010819 | 1.47 | 1.46  | 9.13  | 0.001 |
| Cytochrome b-245, beta polypeptide (Cybb), mRNA                                      | NM_007807 | 1.09 | 1     | 2.39  | 0.001 |
| Cytochrome P450, CYP3A                                                               | AB039380  | 2.01 | -4    | 1.88  | 0.001 |
| DCP2 decapping enzyme homolog (S. cerevisiae) (Dcp2), mRNA                           | AK017809  | 1.47 | 1.42  | 3.44  | 0.001 |
| Dimethylarginine dimethylaminohydrolase 1, mRNA (cDNA clone MGC:30267 IMAGE:5134831) | BB770857  | 1.36 | 1.13  | 2.22  | 0.001 |
| Docking protein 2, mRNA (cDNA clone MGC:8067 IMAGE:3587682)                          | NM_010071 | 1.52 | 1.4   | 2.62  | 0.001 |
| Dual oxidase maturation factor 2, mRNA (cDNA clone MGC:35715 IMAGE:4989815)          | NM_025777 | 1.08 | 1.02  | 2.19  | 0.001 |
| ESTs                                                                                 | BG070492  | 2.78 | 1.38  | 7.19  | 0.002 |
| ESTs                                                                                 | BB402828  | 3.36 | -1.37 | 2.37  | 0.003 |
| ESTs                                                                                 | BB324660  | 1.85 | 1.71  | 7.19  | 0.001 |
| ESTs                                                                                 | BE824906  | 1.76 | 1.09  | 2.92  | 0.004 |
| ESTs                                                                                 | BB024203  | 1.5  | 1.28  | 2.07  | 0.006 |
| ESTs                                                                                 | AU022616  | 2.34 | -3.57 | -1.22 | 0.008 |
| ESTs                                                                                 | BB416480  | 1.06 | -5.26 | -1.47 | 0.005 |
| ESTs, Moderately similar to 0901670A c-mos gene (M.musculus)                         | BB667991  | 1.05 | -2.44 | -1.79 | 0.008 |
| ESTs, Weakly similar to probable DNARNA-binding protein (R.norvegicus)               | BG071937  | 1.5  | -4    | -1.01 | 0.001 |
| Expressed sequence AI747448, mRNA (cDNA clone MGC:170715 IMAGE:8862110)              | AI747448  | 2.9  | 2.72  | 29.33 | 0.001 |
| F-box and WD-40 domain protein 13, mRNA (cDNA clone                                  | BB555130  | 1.75 | -1.05 | 2.05  | 0.006 |

|                                                                                                                                |           |      |       |        |       |
|--------------------------------------------------------------------------------------------------------------------------------|-----------|------|-------|--------|-------|
| MGC:157442 IMAGE:40056507)                                                                                                     |           |      |       |        |       |
| Fer-1-like 4 ( <i>C. elegans</i> ) (Fer14), mRNA                                                                               | BQ265161  | 1.59 | 1.19  | 2.19   | 0.001 |
| Fermitin family homolog 3 ( <i>Drosophila</i> ) (Fermt3), mRNA                                                                 | BG066664  | 1.64 | 1.27  | 3.66   | 0.006 |
| Fibronectin type III domain containing 3A, mRNA (cDNA clone IMAGE:5101040)                                                     | AA770704  | 1.02 | -2.22 | -1.69  | 0.001 |
| Ficolin A, mRNA (cDNA clone MGC:29080 IMAGE:5008934)                                                                           | NM_007995 | 1.14 | -1.03 | 2.1    | 0.001 |
| Formyl peptide receptor 1 (Fpr1), mRNA                                                                                         | NM_013521 | 4.36 | 3.42  | 18.1   | 0.007 |
| Frequenin homolog ( <i>Drosophila</i> ) (Freq), mRNA                                                                           | AU079041  | 4.79 | 4.55  | 5.78   | 0.007 |
| G protein-coupled receptor 123, mRNA (cDNA clone IMAGE:5695937)                                                                | BI135044  | 2.27 | 1.45  | 5.27   | 0.001 |
| Gamma-glutamyltransferase 1, mRNA (cDNA clone MGC:13986 IMAGE:4037243)                                                         | NM_008116 | 2.08 | 1.06  | 1.67   | 0.008 |
| Gremlin 1, mRNA (cDNA clone MGC:19137 IMAGE:4216669)                                                                           | BC015293  | 1.18 | 1.08  | 2.56   | 0.001 |
| Guanine deaminase [ <i>Mus spretus</i> ], mRNA sequence                                                                        | NM_010266 | 1.29 | 1.09  | 2.17   | 0.001 |
| Hect (homologous to the E6-AP (UBE3A) carboxyl terminus) domain and RCC1 (CHC1)-like domain (RLD) 1, mRNA (cDNA clone IMAGE:3) | BM247513  | 1    | -3.7  | -3.33  | 0.009 |
| Heme oxygenase (decycling) 1, mRNA (cDNA clone MGC:18463 IMAGE:4235374)                                                        | NM_010442 | 1.4  | 1.21  | 3.54   | 0.001 |
| High density lipoprotein (HDL) binding protein, mRNA (cDNA clone MGC:36446 IMAGE:5354293)                                      | BG065877  | 1.05 | -2.13 | -1.39  | 0.001 |
| Hypothetical protein, partial (TITEST gene)                                                                                    | AK006213  | 4.7  | 1.35  | 3.91   | 0.006 |
| Immunoglobulin superfamily, member 6 (Igsf6), mRNA                                                                             | NM_030691 | 1.69 | 1.03  | 8.47   | 0.003 |
| Indoleamine 2,3-dioxygenase 1 (Ido1), mRNA                                                                                     | NM_008324 | 2    | 1.35  | 8.98   | 0.001 |
| Integrator complex subunit 5, mRNA (cDNA clone MGC:31173 IMAGE:4191047)                                                        | BE307471  | 1.04 | -2.63 | -1.32  | 0.009 |
| Inter alpha-trypsin inhibitor, heavy chain 4, mRNA (cDNA clone MGC:25281 IMAGE:4211735)                                        | AK004893  | 3.11 | 1.07  | 6.56   | 0.001 |
| Interleukin 1 alpha, mRNA (cDNA clone MGC:5780                                                                                 | BC003727  | 1.88 | 1.62  | 11.975 | 0.004 |

|                                                                                                                                            |           |      |       |       |       |
|--------------------------------------------------------------------------------------------------------------------------------------------|-----------|------|-------|-------|-------|
| IMAGE:3599550)                                                                                                                             |           |      |       |       |       |
| Interleukin 1 receptor-like 1 (Il1rl1), transcript variant 2, mRNA                                                                         | NM_010743 | 1.49 | -1.03 | 6.72  | 0.001 |
| Islet amyloid polypeptide, mRNA (cDNA clone MGC:41171 IMAGE:1379049)                                                                       | BM569571  | 2.33 | -1.3  | 1.73  | 0.005 |
| Kallikrein 6, mRNA (cDNA clone MGC:36051 IMAGE:4954976)                                                                                    | NM_011177 | 1.98 | 1.65  | 3.6   | 0.003 |
| Keratin 16 (Krt16), mRNA                                                                                                                   | NM_008470 | 2.36 | 1.69  | 8.39  | 0.002 |
| Kidney androgen regulated protein, mRNA (cDNA clone MGC:18550 IMAGE:4221610)                                                               | NM_010594 | 2.05 | -1.72 | 1.67  | 0.009 |
| Kin of IRRE like 3 (Drosophila), mRNA (cDNA clone MGC:67442 IMAGE:5695003)                                                                 | AW494250  | 4.03 | -1.08 | 1.16  | 0.003 |
| Lectin, galactose-binding, soluble 2, mRNA (cDNA clone MGC:41038 IMAGE:1434603)                                                            | NM_025622 | 2.06 | -1.12 | 1.89  | 0.001 |
| Lymphocyte antigen 6 complex, locus I (Ly6i), mRNA                                                                                         | AF232024  | 1.62 | 1.15  | 2.59  | 0.003 |
| Lysophosphatidylcholine acyltransferase 4, mRNA (cDNA clone MGC:91161 IMAGE:30435722)                                                      | BI155142  | 1.84 | 1.25  | 2.67  | 0.001 |
| MAD homolog 3 (Drosophila) (Smad3), mRNA                                                                                                   | BI150236  | 1.27 | -4.55 | -1.14 | 0.001 |
| Matrix metalloproteinase 9 (Mmp9), mRNA                                                                                                    | NM_013599 | 2.29 | 2.17  | 13.77 | 0.001 |
| Membrane-spanning 4-domains, subfamily A, member 4C, mRNA (cDNA clone MGC:41005 IMAGE:1383416)                                             | NM_029499 | 1.45 | 1.43  | 6.25  | 0.001 |
| Mitogen-activated protein kinase kinase kinase 8 (Map3k8), mRNA                                                                            | NM_007746 | 1.16 | -1.05 | 3.9   | 0.001 |
| Mus musculus adult male testis cDNA, RIKEN full-length enriched library, clone:4930441F12:unclassifiable transcript, full insert sequence. | AK019605  | 6.19 | -1.56 | 2.2   | 0.002 |
| Mus musculus mRNA for p47phox, complete cds.                                                                                               | BE370703  | 1.03 | -1.03 | 2.04  | 0.003 |
| Mus musculus mVL30-1 retroelement mRNA sequence                                                                                            | BB119177  | 1.08 | 1.08  | 3.86  | 0.001 |
| Mus musculus, clone IMAGE:3590081, mRNA, partial cds                                                                                       | BF719154  | 1.12 | 1.07  | 4.47  | 0.001 |
| neutrophil cytosolic factor 1 /FL=gb:AB002663.1                                                                                            | BE370703  | 1.21 | 1.14  | 2.56  | 0.005 |
| Orphan G-protein coupled receptor Dez                                                                                                      | AW228687  | 1.65 | 1.62  | 2.46  | 0.001 |
| Osteopontin (OPN)                                                                                                                          | NM_009263 | 1.06 | 1.02  | 8.75  | 0.004 |

|                                                                                           |           |      |       |       |       |
|-------------------------------------------------------------------------------------------|-----------|------|-------|-------|-------|
| Phosphatase, orphan 1 (Phospho1), mRNA                                                    | AJ457190  | 1.21 | -2.86 | -1.54 | 0.001 |
| Phosphatidylinositol transfer protein, cytoplasmic 1 (Pitpnc1), mRNA                      | AI595920  | 1.79 | 1.71  | 2.05  | 0.001 |
| Phosphoprotein associated with glycosphingolipid microdomains 1 (Pag1), mRNA              | BB168920  | 1.34 | -2.04 | 1.27  | 0.008 |
| Pleckstrin homology domain containing, family O member 2 (Plekho2), mRNA                  | AA049040  | 1.24 | 1.17  | 2.21  | 0.001 |
| Poliovirus receptor-related 1 (Pvr11), mRNA                                               | BF467558  | 1.52 | -2.86 | -2.44 | 0.008 |
| PREDICTED: Mus musculus hect domain and RLD 5, transcript variant 1 (Herc5), mRNA         | AW208668  | 1.12 | 1.02  | 2.24  | 0.008 |
| PREDICTED: Mus musculus hypothetical protein LOC628951 (LOC628951), mRNA                  | BB355057  | 1.3  | -2.94 | -1.52 | 0.001 |
| PREDICTED: Mus musculus potassium channel, subfamily K, member 16 (Kcnk16), mRNA          | AK014626  | 1.51 | -1.89 | 2.61  | 0.005 |
| PREDICTED: Mus musculus transmembrane protein 30C (Tmem30c), mRNA                         | AK016597  | 1.04 | -2.44 | 1.13  | 0.003 |
| Pregnancy-associated plasma protein-A                                                     | AF439513  | 2.19 | 1.45  | 2.8   | 0.003 |
| Programmed cell death 6 interacting protein, mRNA (cDNA clone MGC:28437 IMAGE:4038684)    | AJ005074  | 1.07 | -2.56 | -1.39 | 0.001 |
| Properdin (AA 5 - 441)                                                                    | BB800282  | 1.45 | 1.37  | 3.25  | 0.001 |
| Protease, serine, 22 (Prss22), mRNA                                                       | NM_133731 | 1.35 | 1.18  | 4.3   | 0.001 |
| PTK6 protein tyrosine kinase 6 (Ptk6), mRNA                                               | NM_009184 | 1.6  | 1.35  | 3.51  | 0.001 |
| Receptor-interacting serine-threonine kinase 3, mRNA (cDNA clone MGC:35896 IMAGE:3590770) | NM_019955 | 1.24 | 1.15  | 2.59  | 0.001 |
| Regenerating islet-derived 3 alpha (Reg3a), mRNA                                          | NM_011259 | 1.08 | -1.05 | 7.67  | 0.007 |
| Reticuloendotheliosis oncogene (Rel), mRNA                                                | NM_009044 | 1.46 | 1.24  | 2.35  | 0.005 |
| Retinaldehyde binding protein 1-like 2, mRNA (cDNA clone MGC:67413 IMAGE:5690124)         | BB546230  | 7.56 | 4.05  | 5.41  | 0.001 |
| RIKEN cDNA 1110050P16 gene                                                                | AI644298  | 1.13 | -2.5  | -1.14 | 0.002 |

|                                                                                                                     |           |      |       |       |       |
|---------------------------------------------------------------------------------------------------------------------|-----------|------|-------|-------|-------|
| RIKEN cDNA 1810033B17 gene (1810033B17Rik), mRNA                                                                    | BB533148  | 1.6  | 1.45  | 6.85  | 0.003 |
| RIKEN cDNA 2210019G11 gene                                                                                          | AK008754  | 1.22 | 1     | 2.46  | 0.002 |
| RIKEN cDNA 3930401B19 gene                                                                                          | AU018141  | 1.08 | -1.03 | 4.12  | 0.001 |
| RIKEN cDNA 4930529M08 gene, mRNA (cDNA clone MGC:129508 IMAGE:40050496)                                             | BB521182  | 1.74 | 1.64  | 2.89  | 0.004 |
| RIKEN cDNA 5830432F11 gene                                                                                          | AK017963  | 1.96 | -3.33 | -2.38 | 0.003 |
| RIKEN cDNA 8430408G22 gene (8430408G22Rik), mRNA                                                                    | AV365503  | 2.75 | 2.28  | 2.68  | 0.006 |
| RIKEN cDNA 9030205A07 Gene (9030205A07Rik), mRNA                                                                    | BE955645  | 2.92 | -1.35 | 5.52  | 0.005 |
| RIKEN cDNA 9530053H05 gene                                                                                          | BE373131  | 1.26 | 1.23  | 2.62  | 0.007 |
| RIKEN cDNA D930048N14 gene, mRNA (cDNA clone MGC:106227 IMAGE:5341501)                                              | AI315703  | 3.95 | -1.39 | 1.6   | 0.001 |
| Secreted frizzled-related protein 1, mRNA (cDNA clone MGC:37430 IMAGE:4982195)                                      | BI658627  | 1.22 | 1.2   | 2.43  | 0.001 |
| Selectin, endothelial cell (Sele), mRNA                                                                             | NM_011345 | 4.33 | 2.85  | 10.57 | 0.001 |
| Serine (or cysteine) peptidase inhibitor, clade A, member 3K, mRNA (cDNA clone MGC:30243 IMAGE:5050045)             | BC011158  | 4.88 | 4.83  | 34.38 | 0.001 |
| Serine (or cysteine) peptidase inhibitor, clade E, member 1 (Serpine1), mRNA                                        | NM_008871 | 1.94 | 1.46  | 4.35  | 0.001 |
| Solute carrier family 10, member 2 (Slc10a2), mRNA                                                                  | NM_011388 | 1.08 | -3.13 | -1.89 | 0.003 |
| Solute carrier family 11 (proton-coupled divalent metal ion transporters), member 1 (Slc11a1), mRNA                 | NM_013612 | 1.21 | 1.19  | 2.43  | 0.001 |
| Solute carrier family 22 (organic cation transporter), member 14 (Slc22a14), mRNA                                   | AV275747  | 3.86 | 1.49  | 1.76  | 0.009 |
| Solute carrier family 7 (cationic amino acid transporter, y+ system), member 2 (Slc7a2), transcript variant 1, mRNA | M62838    | 1.92 | 1.88  | 2.51  | 0.005 |
| Stefin A2 like 1, mRNA (cDNA clone MGC:155670 IMAGE:8734103)                                                        | BB667930  | 1.75 | 1.04  | 8.04  | 0.003 |
| Sterol O-acyltransferase 2 (Soat2), mRNA                                                                            | BC025931  | 2.56 | 1.66  | 4.19  | 0.006 |
| Strain SJL/J small inducible cytokine A10 (ScyA10)                                                                  | AF128196  | 1.31 | -1.06 | 2.35  | 0.001 |

|                                                                                                                               |          |       |       |       |       |
|-------------------------------------------------------------------------------------------------------------------------------|----------|-------|-------|-------|-------|
| Strawberry notch homolog 2 (Drosophila), mRNA (cDNA clone IMAGE:3376209)                                                      | BF148215 | 1.14  | 1.06  | 2.05  | 0.001 |
| T-cell antigen receptor                                                                                                       | X01134   | 1.94  | 1.88  | 3     | 0.002 |
| Thrombospondin 1 (Thbs1), mRNA                                                                                                | AI385532 | 1.05  | -1.01 | 2.66  | 0.001 |
| toll-like receptor 13                                                                                                         | BI655907 | 1.56  | 1.55  | 3.62  | 0.001 |
| Transcribed locus                                                                                                             | AI646416 | 2.06  | 1.6   | 2.92  | 0.008 |
| Transcribed locus                                                                                                             | AI843843 | 3.97  | 2.55  | 3.12  | 0.009 |
| Transcribed locus                                                                                                             | AK016204 | 1.43  | 1.19  | 6.85  | 0.002 |
| Transcribed locus                                                                                                             | AK016745 | 1.36  | -5.56 | -1.22 | 0.003 |
| Transcribed locus                                                                                                             | AK017439 | 2.62  | -1.47 | 1.84  | 0.007 |
| Transcribed locus                                                                                                             | AW546684 | 1.89  | 1.13  | 2.04  | 0.001 |
| Transcribed locus                                                                                                             | BB226319 | 1.73  | 1.69  | 2.09  | 0.007 |
| Transcribed locus                                                                                                             | BE953024 | 1.55  | -3.33 | -1.96 | 0.009 |
| Transcribed locus                                                                                                             | AW049407 | 3.77  | -1.2  | -1.12 | 0.001 |
| Transcribed locus                                                                                                             | BB667902 | 1.2   | 1.05  | 2.14  | 0.006 |
| Transcribed locus                                                                                                             | AV115271 | 2.79  | 1.91  | 3.1   | 0.006 |
| Transcribed locus                                                                                                             | BG069943 | 13.33 | 10.12 | 14.48 | 0.007 |
| Transcribed locus                                                                                                             | BB340673 | 1.84  | -2.13 | 1.06  | 0.004 |
| Transcribed locus                                                                                                             | BB400784 | 1.48  | -3.57 | 1.24  | 0.001 |
| Transcribed locus                                                                                                             | AV347341 | 2.04  | 2.03  | 2.67  | 0.006 |
| Transcribed locus                                                                                                             | AI323550 | 1.12  | 1.08  | 2.28  | 0.001 |
| Transcribed locus, moderately similar to NP_751892.1 potassium voltage-gated channel, shaker-related subfamily, beta member 1 | AW457248 | 2.13  | -2.78 | 1.74  | 0.001 |
| Transcribed locus, moderately similar to XP_145521.8 PREDICTED: zinc finger protein 507 [Mus musculus]                        | AK021412 | 1.925 | -1.54 | 5.96  | 0.001 |
| Transcribed locus, strongly similar to NP_034683.1 interleukin 18 receptor accessory protein [Mus musculus]                   | AV247387 | 1.05  | 1     | 2.69  | 0.004 |
| Transcribed locus, strongly similar to NP_038588.2 heat shock protein 1 [Mus musculus]                                        | AK019498 | 3.86  | 2.36  | 3.86  | 0.006 |

|                                                                                                                               |           |      |       |       |       |
|-------------------------------------------------------------------------------------------------------------------------------|-----------|------|-------|-------|-------|
| Transcribed locus, strongly similar to NP_113776.1 neuregulin 1 [Rattus norvegicus]                                           | AV318914  | 1.59 | 1.38  | 2.92  | 0.001 |
| Transcribed locus, strongly similar to NP_908998.1 retrotransposon-like 1 [Mus musculus]                                      | AW060983  | 2.99 | 1.23  | 5.23  | 0.004 |
| Transcribed locus, strongly similar to XP_001058720.1 PREDICTED: hypothetical protein [Rattus norvegicus]                     | BG068839  | 3.4  | 2.94  | 4.33  | 0.008 |
| Transcribed locus, strongly similar to XP_001475418.1 PREDICTED: hypothetical protein LOC77271 [Mus musculus]                 | BB448693  | 3.32 | 2.67  | 3.82  | 0.007 |
| Transcription factor Sp8 (Sp8 gene)                                                                                           | AV302930  | 2.04 | -3.57 | 1.23  | 0.006 |
| Transglutaminase 2, C polypeptide, mRNA (cDNA clone MGC:6152 IMAGE:3256943)                                                   | AF114266  | 1.12 | 1.09  | 2.17  | 0.001 |
| Triggering receptor expressed on myeloid cells 1 (Trem1), mRNA                                                                | BB784999  | 1.5  | 1.15  | 5.89  | 0.001 |
| Triggering receptor expressed on myeloid cells 2, mRNA (cDNA clone MGC:35870 IMAGE:4953284)                                   | NM_031254 | 1.15 | -2.12 | 2.81  | 0.001 |
| Triggering receptor expressed on myeloid cells-like 2a dominant splice variant (Trem12) mRNA, complete cds, alternatively spl | BE457612  | 1.42 | 1.13  | 4.51  | 0.006 |
| Tripartite motif-containing 15, mRNA (cDNA clone MGC:28593 IMAGE:4215801)                                                     | BC027186  | 1.19 | 1.12  | 5.57  | 0.001 |
| Ubiquitin C, mRNA (cDNA clone IMAGE:2645223)                                                                                  | BI653033  | 1.05 | -2    | -1.64 | 0.002 |
| Ubiquitin D, mRNA (cDNA clone MGC:41063 IMAGE:1347593)                                                                        | NM_023137 | 1.42 | 1.16  | 3.26  | 0.001 |
| Ubiquitin-conjugating enzyme E2L 6, mRNA (cDNA clone MGC:6532 IMAGE:2651702)                                                  | BC008238  | 1.12 | -1.05 | 2.01  | 0.001 |
| UDP-Gal:betaGlcNAc beta 1,4- galactosyltransferase, polypeptide 2 (B4galt2), mRNA                                             | AW125856  | 2.12 | -2.13 | 1.75  | 0.006 |
| Vanin 1, mRNA (cDNA clone MGC:29064 IMAGE:5041670)                                                                            | NM_011704 | 1.6  | 1.1   | 2.04  | 0.003 |
| Visinin-like protein 1                                                                                                        | NM_012038 | 5.03 | 4.27  | 5.08  | 0.006 |
| V-set and immunoglobulin domain containing 4, mRNA (cDNA clone MGC:36211 IMAGE:4162875)                                       | BC025105  | 1.05 | -1.23 | 2.39  | 0.001 |
| Wingless-related MMTV integration site 7B (Wnt7b), mRNA                                                                       | W29605    | 2.44 | 2.2   | 2.76  | 0.004 |
| Z-DNA binding protein 1, mRNA (cDNA clone MGC:28261                                                                           | NM_021394 | 1.25 | 1.23  | 4.43  | 0.001 |



|                |  |  |  |  |  |
|----------------|--|--|--|--|--|
| IMAGE:4007636) |  |  |  |  |  |
|----------------|--|--|--|--|--|

**(-) represents fold down regulation from day 0 control.**
