# Supplementary material
Source: PubMed Central journal article supplement (PMC3026350)
Supplement: tableS6.pdf [file tableS6.pdf]

**Table F: D0>D2<D4>D6**

| Gene Title                                                                              | Gene Identifier | D2/D0 | D4/D0 | D6/D0 | P     |
|-----------------------------------------------------------------------------------------|-----------------|-------|-------|-------|-------|
| 5 hydroxytryptamine (serotonin) receptor 4 (Htr4), mRNA                                 | BB431008        | -1.28 | -1.27 | -3.03 | 0.001 |
| Achaete-scute complex homolog 2 (Drosophila), mRNA (cDNA clone MGC:28478 IMAGE:4163833) | AK010738        | -2.17 | -1.35 | -2.44 | 0.001 |
| Acid phosphatase-like 2 (Acpl2), mRNA                                                   | BB183525        | -1.15 | -1.04 | -2.04 | 0.001 |
| Adaptor-related protein complex 2, beta 1 subunit (Ap2b1), transcript variant 2, mRNA   | AW493372        | -1.96 | 1.45  | -2.27 | 0.004 |
| Annexin A1, mRNA (cDNA clone MGC:8074 IMAGE:3587973)                                    | BE331865        | -6.25 | -5.26 | -7.69 | 0.005 |
| Anterior gradient homolog 3 (Xenopus laevis), mRNA (cDNA clone MGC:32220 IMAGE:5008294) | BC023499        | -1.16 | 1     | -5.88 | 0.001 |
| Axin2 (Axin2), mRNA                                                                     | BB398993        | -2.08 | -1.69 | -1.89 | 0.001 |
| Bestrophin 2, mRNA (cDNA clone MGC:37437 IMAGE:4982413)                                 | BC019528        | -1.18 | -1.11 | -3.7  | 0.001 |
| BetaKlotho protein putative polymorphic isoform                                         | NM_031180       | -1.33 | -1.25 | -2.86 | 0.001 |
| Brain expressed gene 4, mRNA (cDNA clone MGC:116687 IMAGE:30677421)                     | AK010400        | -1.22 | -1.02 | -2.33 | 0.001 |
| Clq and tumor necrosis factor related protein 3, mRNA (cDNA clone IMAGE:3989958)        | NM_030888       | -1.16 | 1.19  | -2.86 | 0.001 |
| Cadherin-like 26 (Cdh26), mRNA                                                          | BB748621        | -1.2  | -1.18 | -2.78 | 0.003 |
| CAMP phosphodiesterase 7A1                                                              | BM245060        | -1.11 | 1.05  | -2.04 | 0.001 |
| Carboxypeptidase M (Cpm), mRNA                                                          | AK004327        | -1.96 | -1.61 | -2.94 | 0.001 |
| Cathepsin E, mRNA (cDNA clone MGC:5924 IMAGE:3601519)                                   | NM_007799       | -1.16 | 1.11  | -3.7  | 0.001 |
| CDNA clone IMAGE:40092312                                                               | BB209207        | -1.41 | -1.02 | -2.5  | 0.001 |
| CDNA sequence BC021891 (BC021891), mRNA                                                 | AV370141        | -1.25 | -1.23 | -2.04 | 0.001 |
| Chemokine (C-C motif) ligand 28 (Ccl28), mRNA                                           | BE196980        | -1.23 | -1.11 | -2.13 | 0.001 |
| Chloride intracellular channel 6, mRNA (cDNA clone MGC:78011 IMAGE:2648653)             | BQ176424        | -1.25 | -1.03 | 3.33  | 0.001 |
| Complement component 4 binding protein, mRNA (cDNA clone                                | NM_007576       | -1.19 | -1.16 | -2.38 | 0.001 |

|                                                                                                  |           |       |       |       |       |
|--------------------------------------------------------------------------------------------------|-----------|-------|-------|-------|-------|
| MGC:18586 IMAGE:4163203)                                                                         |           |       |       |       |       |
| Cortactin binding protein 2, mRNA (cDNA clone MGC:176369 IMAGE:9056020)                          | BB357580  | -1.85 | -1.3  | -3.23 | 0.001 |
| Cytochrome P450, family 2, subfamily f, polypeptide 2, mRNA (cDNA clone MGC:29973 IMAGE:5123751) | NM_007817 | -1.14 | 1.33  | -2.33 | 0.001 |
| Desert hedgehog (Dhh), mRNA                                                                      | AV367068  | -1.64 | 2.47  | 2.21  | 0.002 |
| Discs, large (Drosophila) homolog-associated protein 1 (Dlgap1), transcript variant 2, mRNA      | AK016873  | -5    | 2.37  | -1.79 | 0.001 |
| DNA segment, Chr 3, ERATO Doi 797, expressed                                                     | BG070427  | -4.17 | -1.33 | -10   | 0.007 |
| DNA segment, Chr 4, ERATO Doi 571, expressed                                                     | AU022854  | -5.56 | 1     | -1.79 | 0.001 |
| Doublesex and mab-3 related transcription factor 3, mRNA (cDNA clone MGC:62407 IMAGE:6404988)    | AV298122  | -3.03 | 1.05  | -4    | 0.002 |
| EST                                                                                              | AA619999  | -1.28 | 1.1   | -2.94 | 0.001 |
| EST X83313                                                                                       | BG065719  | -2.7  | -2    | -2.44 | 0.002 |
| Estrogen receptor related protein 3 (ERR3)                                                       | BM120846  | -1.3  | -1.01 | -2.94 | 0.001 |
| ESTs                                                                                             | BE952592  | -1.96 | 3.25  | 2.42  | 0.006 |
| ESTs                                                                                             | AV264369  | -1.47 | -1.05 | -2.94 | 0.001 |
| ESTs                                                                                             | AW546720  | -1.25 | 1.03  | -4.17 | 0.002 |
| ESTs                                                                                             | AI504044  | -3.33 | -1.18 | -1.79 | 0.006 |
| ESTs                                                                                             | AU043163  | -2.94 | 1.96  | -1.64 | 0.007 |
| ESTs                                                                                             | BB177655  | -1.96 | -1.2  | -4.55 | 0.003 |
| ESTs                                                                                             | BE650280  | -2.86 | -2.04 | -6.25 | 0.001 |
| ESTs, Weakly similar to GAG2_HUMAN RETROVIRUS-RELATED GAG POLYPROTEIN (H.sapiens)                | BG069039  | -3.33 | 1.52  | -1.72 | 0.005 |
| ets variant gene 4 (E1A enhancer binding protein, E1AF)                                          | X63190    | -3.33 | -2.86 | -9.09 | 0.001 |
| Family with sequence similarity 46, member C, mRNA (cDNA clone IMAGE:5030542)                    | AK015259  | -1.17 | -1.14 | -2.04 | 0.008 |
| Family with sequence similarity 55, member B (Fam55b), mRNA                                      | BB451000  | -1.37 | -1.35 | -2.7  | 0.001 |
| Family with sequence similarity 55, member D, mRNA (cDNA                                         | BB072624  | -1.2  | -1.19 | -4.17 | 0.001 |

|                                                                                         |           |       |       |        |       |
|-----------------------------------------------------------------------------------------|-----------|-------|-------|--------|-------|
| clone MGC:115749 IMAGE:30693393)                                                        |           |       |       |        |       |
| FERM, RhoGEF and pleckstrin domain protein 2 (Farp2), mRNA                              | BC009153  | -1.39 | -1.27 | -2.13  | 0.004 |
| Fibroblast growth factor receptor 3 (Fgfr3), mRNA                                       | NM_008010 | -1.01 | 1.12  | -2.22  | 0.001 |
| Fucosyltransferase 9 (Fut9), mRNA                                                       | AU067636  | -1.89 | -1.79 | -11.11 | 0.001 |
| G protein-coupled receptor, family C, group 5, member B (Gprc5b), mRNA                  | BC020004  | -1.03 | 2.19  | 2.1    | 0.001 |
| Galectin-related inter-fiber protein (Grifin), mRNA                                     | AK021365  | -2.22 | 1.85  | 1.44   | 0.006 |
| Glutathione S-transferase, mu 6, mRNA (cDNA clone MGC:19322 IMAGE:4196506)              | NM_008184 | -1.25 | -1.23 | -2.63  | 0.001 |
| Hemicentin 1 (Hmcn1), mRNA                                                              | BB024475  | -1.41 | 1.03  | -3.03  | 0.001 |
| Hepsin (Hpn), transcript variant 2, mRNA                                                | NM_008281 | -1.15 | 1.12  | -2.08  | 0.002 |
| Hexosaminidase B (Hexb), mRNA                                                           | AV225808  | -1.12 | 1.13  | -2.27  | 0.001 |
| High mobility group AT-hook 2 (Hmga2), mRNA                                             | X58380    | -1.43 | -1.43 | -2.44  | 0.008 |
| Homeo box B13, mRNA (cDNA clone MGC:18675 IMAGE:4207456)                                | BC013639  | -1.2  | -1.12 | -4.76  | 0.001 |
| Hoxa11 locus antisense-59 mRNA                                                          | BB550242  | -1.15 | 1.13  | -2.63  | 0.001 |
| hypothetical gene LOC72520                                                              | AW215497  | -5    | -3.03 | -5.56  | 0.003 |
| hypothetical protein LOC215866                                                          | BC002257  | -4.76 | -1.22 | -2.94  | 0.005 |
| Immunoglobulin mu binding protein 2 (Ighmbp2), mRNA                                     | AW259474  | -4.17 | -2.04 | -5.56  | 0.004 |
| Inter-alpha trypsin inhibitor, heavy chain 2, mRNA (cDNA clone MGC:25336 IMAGE:4211576) | NM_010582 | -1.06 | -1.04 | -6.25  | 0.001 |
| Interleukin 17 receptor E (Il17re), transcript variant 1, mRNA                          | BB291414  | -1.16 | -1.09 | -2.13  | 0.001 |
| Leucine rich repeat containing G protein coupled receptor 5 (Lgr5), mRNA                | BB751088  | -1.85 | -1.59 | -2.08  | 0.001 |
| Liprin-alpha 2 (ppfia2)                                                                 | AI854225  | -3.13 | 1.3   | -1.14  | 0.006 |
| Major facilitator superfamily domain containing 4 (Mfsd4), transcript variant b, mRNA   | AW046689  | -1.15 | 1.06  | -2.13  | 0.001 |
| Mitochondrial trans-2-enoyl-CoA reductase, mRNA (cDNA clone MGC:6611 IMAGE:3488760)     | NM_025297 | -1.27 | -1.16 | -2.04  | 0.001 |

|                                                                                                          |           |       |       |       |       |
|----------------------------------------------------------------------------------------------------------|-----------|-------|-------|-------|-------|
| Mitogen-activated protein kinase 15, mRNA (cDNA clone IMAGE:6309214)                                     | BB235956  | -1.54 | 1.03  | -4.17 | 0.001 |
| Multiple EGF-like-domains 10 (Megf10), mRNA                                                              | AK013855  | -1.45 | 2.03  | -1.06 | 0.009 |
| Mus musculus, clone IMAGE:5124369, mRNA, partial cds                                                     | BB027848  | -1.07 | -1.02 | -2.86 | 0.001 |
| Neural precursor cell expressed, developmentally down-regulated gene 10, mRNA (cDNA clone IMAGE:6827030) | AV236080  | -1.33 | 1.12  | -2.78 | 0.001 |
| Neuroglobin, mRNA (cDNA clone MGC:35839 IMAGE:5133442)                                                   | NM_022414 | -1.32 | 1.39  | -3.23 | 0.005 |
| Outer dense fiber of sperm tails 3B (Odf3b), mRNA                                                        | AI451392  | -1.52 | -1.15 | -3.13 | 0.001 |
| Oxysterol binding protein-like 6 (Osbp16), mRNA                                                          | BG070848  | -1.3  | -1.14 | -2.04 | 0.001 |
| PDZK1 interacting protein 1, mRNA (cDNA clone MGC:19227 IMAGE:4241868)                                   | BC013542  | -1.14 | -1.02 | -2.04 | 0.001 |
| Peroxisomal protein (PeP gene)                                                                           | AW556555  | -1.37 | -1.11 | -2.86 | 0.001 |
| phosphodiesterase 1C                                                                                     | AK017183  | -1.49 | 2     | -3.85 | 0.005 |
| Piccolo (presynaptic cytomatrix protein) (Pclo), transcript variant 1, mRNA                              | AW493746  | -1.18 | 3.59  | 1.41  | 0.008 |
| PKD2L1 mRNA for polycystic kidney disease 2-like 1                                                       | BB332752  | -3.33 | 1.48  | 1.08  | 0.005 |
| Poly (A) polymerase alpha (Papola), mRNA                                                                 | AW556821  | -1.41 | 1     | -2.08 | 0.001 |
| Potassium voltage-gated channel, Isk-related subfamily, gene 3, mRNA (cDNA clone MGC:6717 IMAGE:3586054) | NM_020574 | -1.2  | -1.16 | -2.04 | 0.001 |
| Predicted gene, OTTMUSG00000015859, mRNA (cDNA clone MGC:163857 IMAGE:40130503)                          | AI415386  | -1.15 | -1.02 | -2.94 | 0.001 |
| PREDICTED: Mus musculus hypothetical protein LOC100040862 (LOC100040862), mRNA                           | BB199157  | -1.1  | 1.16  | -2.33 | 0.001 |
| PREDICTED: Mus musculus RIKEN cDNA 2210039B01 gene (2210039B01Rik), mRNA                                 | AK008780  | -1.2  | 1.2   | -2.04 | 0.006 |
| PREDICTED: Mus musculus RIKEN cDNA 2810433D01 gene (2810433D01Rik), mRNA                                 | BG798172  | -1.12 | 1.21  | -3.13 | 0.009 |
| Proline synthetase co-transcribed (Prosc), transcript variant 1, mRNA                                    | AV340971  | -2.17 | 1.14  | 1.06  | 0.001 |

|                                                                                                                        |           |       |       |       |       |
|------------------------------------------------------------------------------------------------------------------------|-----------|-------|-------|-------|-------|
| RasGEF domain family, member 1C (Rasgef1c), mRNA                                                                       | AK018593  | -1.04 | 3.36  | 2.05  | 0.007 |
| Response gene to complement 32                                                                                         | NM_025427 | -2.13 | -1.61 | -1.87 | 0.001 |
| RIKEN cDNA 1810030J14 gene, mRNA (cDNA clone MGC:35753 IMAGE:4985132)                                                  | NM_025470 | -1.14 | -1.08 | -12.5 | 0.001 |
| RIKEN cDNA 2210023G05 gene, mRNA (cDNA clone IMAGE:1395085)                                                            | BC027185  | -1.09 | -1.04 | -2    | 0.001 |
| RIKEN cDNA 2900012M01 gene                                                                                             | AV153257  | -1.25 | 4.11  | 3.52  | 0.002 |
| RIKEN cDNA 3830431G21 gene, mRNA (cDNA clone MGC:169226 IMAGE:8860621)                                                 | AV225683  | -1.69 | -1.16 | -5.88 | 0.001 |
| RIKEN cDNA 4833420L08 gene                                                                                             | AV250076  | -3.13 | -2.27 | -10   | 0.002 |
| RIKEN cDNA 9130013M11 gene                                                                                             | BB118542  | -1.04 | 1.14  | -2.86 | 0.001 |
| RIKEN cDNA A930039J07 gene                                                                                             | BB283066  | -7.14 | -3.23 | -3.85 | 0.004 |
| RIKEN cDNA C630004H02 gene, mRNA (cDNA clone MGC:28513 IMAGE:4190480)                                                  | BC024617  | -1.1  | 1.06  | -2.08 | 0.001 |
| SA protein (Sah)                                                                                                       | AB022340  | -1.2  | -1.04 | -2.63 | 0.001 |
| Shisa homolog 2 ( <i>Xenopus laevis</i> ) (Shisa2), mRNA                                                               | BC024118  | -1.2  | -1.12 | -2    | 0.001 |
| Solute carrier family 1 (neuronal/epithelial high affinity glutamate transporter, system Xag), member 1 (Slc1a1), mRNA | AF087578  | -1.45 | -1.23 | -2.33 | 0.001 |
| Solute carrier family 13 (sodium/sulfate symporters), member 4, mRNA (cDNA clone MGC:99960 IMAGE:30440173)             | BB192951  | -2.13 | 4.99  | 3.35  | 0.003 |
| Solute carrier family 46, member 1, mRNA (cDNA clone IMAGE:4984454)                                                    | AK003278  | -1.28 | -1.16 | -2.33 | 0.004 |
| Solute carrier family 6 (neurotransmitter transporter), member 20A (Slc6a20a), mRNA                                    | AJ428067  | -1.32 | -1.09 | -2.33 | 0.001 |
| Spindle assembly 6 homolog ( <i>C. elegans</i> ) (Sass6), mRNA                                                         | AK013338  | -7.14 | -1.67 | -1.79 | 0.001 |
| Synaptotagmin-like 1 (Sytl1), mRNA                                                                                     | NM_031393 | -1.15 | -1.08 | -3.03 | 0.001 |
| Tetraspanin 33 (Tspan33), mRNA                                                                                         | BC024685  | -1.25 | 1.04  | -2.04 | 0.001 |
| Thrombospondin 4 (Thbs4), mRNA                                                                                         | NM_011582 | -1.03 | 1.07  | -2.22 | 0.001 |
| Thymosin beta-like (LOC666244), mRNA                                                                                   | BG093687  | -4.55 | 1.97  | 1.2   | 0.006 |

|                                                                                                                                     |          |       |       |        |       |
|-------------------------------------------------------------------------------------------------------------------------------------|----------|-------|-------|--------|-------|
| Transcribed locus                                                                                                                   | BB223880 | -2.5  | 1.1   | -4.17  | 0.006 |
| Transcribed locus                                                                                                                   | AK016911 | -1.02 | 6.56  | 4.76   | 0.001 |
| Transcribed locus                                                                                                                   | AK012503 | -3.57 | -2.94 | -16.67 | 0.002 |
| Transcribed locus                                                                                                                   | AV205672 | -2.5  | 1.62  | 1.36   | 0.008 |
| Transcribed locus                                                                                                                   | AK015805 | -2.04 | 2.39  | 2.1    | 0.001 |
| Transcribed locus                                                                                                                   | BQ176550 | -1.2  | -1.12 | -2.08  | 0.001 |
| Transcribed locus                                                                                                                   | BB055532 | -2.27 | -1.69 | -1.96  | 0.003 |
| Transcribed locus                                                                                                                   | BM249382 | -1.45 | -1.19 | -3.33  | 0.001 |
| Transcribed locus                                                                                                                   | AV260557 | -1.16 | 1.07  | -5.56  | 0.004 |
| Transcribed locus                                                                                                                   | BG073826 | -1.3  | 2.1   | 1.68   | 0.006 |
| Transcribed locus                                                                                                                   | AW546271 | -1.25 | -1.18 | -5     | 0.001 |
| Transcribed locus                                                                                                                   | AI505360 | -1.52 | -1.15 | -3.13  | 0.001 |
| Transcribed locus                                                                                                                   | AU040576 | -1.41 | -1.18 | -2.38  | 0.001 |
| Transcribed locus                                                                                                                   | BM119753 | -1.89 | 3.45  | 1.63   | 0.005 |
| Transcribed locus                                                                                                                   | AW488544 | -2    | 1.1   | -2.22  | 0.004 |
| Transcribed locus                                                                                                                   | BB216233 | -6.67 | -4.76 | -7.69  | 0.001 |
| Transcribed locus                                                                                                                   | BB364961 | -1.32 | 1.08  | -2.13  | 0.001 |
| Transcribed locus                                                                                                                   | AV328325 | -1.35 | 2.18  | 1.21   | 0.009 |
| Transcribed locus, moderately similar to XP_001477892.1<br>PREDICTED: hypothetical protein [Mus musculus]                           | BG862223 | -5.26 | 1.3   | -2.63  | 0.001 |
| Transcribed locus, strongly similar to NP_036065.1 estrogen-<br>related receptor gamma [Mus musculus]                               | BM120183 | -1.01 | 1.17  | -4.35  | 0.001 |
| Transcribed locus, strongly similar to XP_001477375.1<br>PREDICTED: hypothetical protein LOC69788 [Mus musculus]                    | BB298201 | -3.23 | 1.36  | 1.04   | 0.004 |
| Transcribed locus, strongly similar to XP_139937.3 PREDICTED:<br>similar to bM573K1.5 (novel Ulp1 protease family member) [Mus<br>m | AV262133 | -4.55 | 1.6   | -2.94  | 0.006 |
| Transcribed locus, strongly similar to XP_418029.1 PREDICTED:<br>hypothetical protein [Gallus gallus]                               | AV283093 | -2    | 1.09  | 1.05   | 0.003 |

|                                                                                                        |           |       |       |       |       |
|--------------------------------------------------------------------------------------------------------|-----------|-------|-------|-------|-------|
| Transcribed locus, weakly similar to NP_001041402.1 hypothetical protein LOC499136 [Rattus norvegicus] | AK007074  | -1.15 | 3.81  | 1     | 0.008 |
| Transcribed locus, weakly similar to NP_055701.1 TGF beta-inducible nuclear protein 1 [Homo sapiens]   | AK017151  | -1.33 | 1.15  | -4.76 | 0.001 |
| Transmembrane 4 superfamily member 4 (Tm4sf4), mRNA                                                    | BC010814  | -1.04 | 2     | 1.48  | 0.001 |
| Transmembrane protein 117 (Tmem117), mRNA                                                              | BB521146  | -1.14 | -1.09 | -2    | 0.001 |
| Transmembrane protein 161A (Tmem161a), mRNA                                                            | BB050507  | -2.27 | -1.37 | -1.45 | 0.004 |
| transthyretin                                                                                          | AV152953  | -1.52 | -1.3  | -7.69 | 0.001 |
| Tubulin polymerization promoting protein (Tppp), mRNA                                                  | AK013631  | -1.72 | -1.59 | -3.7  | 0.001 |
| Tubulin tyrosine ligase-like family, member 6, mRNA (cDNA clone MGC:178686 IMAGE:9053678)              | AI429241  | -1.33 | -1.02 | -2.63 | 0.001 |
| Tubulointerstitial nephritis antigen, mRNA (cDNA clone MGC:18306 IMAGE:4239192)                        | BC010745  | -1.05 | 1.01  | -2.04 | 0.001 |
| Tumor necrosis factor receptor superfamily, member 17, mRNA (cDNA clone MGC:41134 IMAGE:1349977)       | NM_011608 | -4    | -2    | -6.25 | 0.006 |
| Ubiquitin associated protein 2-like (Ubp2l), transcript variant 2, mRNA                                | AA833196  | -5    | -1.39 | -2.7  | 0.005 |
| Ubiquitin specific peptidase 20, mRNA (cDNA clone IMAGE:3672749)                                       | AK006800  | -1.18 | -1.14 | -4    | 0.008 |
| UDP glucuronosyltransferase 2 family, polypeptide B35, mRNA (cDNA clone MGC:132947 IMAGE:40061872)     | AA572504  | -1.09 | 1     | -2.17 | 0.001 |
| UDP-GlcNAc:betaGal beta-1,3-N-acetylglucosaminyltransferase 7 (B3gnt7), mRNA                           | BF578266  | -1.04 | 1.03  | -2.63 | 0.001 |
| Unc-119 homolog (C. elegans), mRNA (cDNA clone MGC:5721 IMAGE:3484396)                                 | BC001990  | -1.09 | 1.05  | -2.04 | 0.001 |
| Vasoactive intestinal peptide receptor type 1 (Vipr1)                                                  | BF224468  | -1.11 | -1.01 | -2.04 | 0.001 |
| WAP four-disulfide core domain 2 (Wfdc2), mRNA                                                         | AF334269  | -1.14 | -1.05 | -3.45 | 0.001 |
| Y box protein 2 (Ybx2), mRNA                                                                           | NM_016875 | -1.37 | 1.02  | -3.23 | 0.001 |
| Zinc finger CCCH type, antiviral 1, mRNA (cDNA clone MGC:27750 IMAGE:2651558)                          | AK013726  | -4.17 | -2.27 | -5.88 | 0.009 |

|                           |          |       |       |    |       |
|---------------------------|----------|-------|-------|----|-------|
| Zinc finger protein Sall1 | AB051409 | -2.86 | -1.85 | -4 | 0.008 |
|---------------------------|----------|-------|-------|----|-------|

**(-) represents fold down regulation from day 0 control.**
