# Supplementary material
Source: PubMed Central journal article supplement (PMC3026350)
Supplement: tableS7.pdf [file tableS7.pdf]

**Table G: D0<D2<D4>D6**

| Gene Title                                                                                              | Gene Identifier | D2/D0 | D4/D0 | D6/D0 | P     |
|---------------------------------------------------------------------------------------------------------|-----------------|-------|-------|-------|-------|
| 3'-phosphoadenosine 5'-phosphosulfate synthase 2 (Papss2), mRNA                                         | BF786072        | 6.24  | 9.96  | 4.08  | 0.008 |
| Ajuba, mRNA (cDNA clone MGC:13721 IMAGE:4187633)                                                        | NM_010590       | 1.31  | 2.02  | 1.8   | 0.001 |
| Alcohol dehydrogenase 1 (class I), mRNA (cDNA clone MGC:18885 IMAGE:4238555)                            | BC013477        | 1.01  | 1.06  | -2.08 | 0.001 |
| angiotensin receptor-like 1                                                                             | BB483357        | 1.3   | 2.42  | 2.23  | 0.001 |
| Ankyrin repeat domain 6 (Ankrd6), transcript variant 2, mRNA                                            | BM225135        | 2.41  | 4.69  | 4.37  | 0.001 |
| ATPase, H <sup>+</sup> transporting, lysosomal V1 subunit G2, mRNA (cDNA clone MGC:28983 IMAGE:4505711) | BC020190        | 1.17  | 2     | 1.48  | 0.003 |
| Avian erythroblastosis virus E-26 (v-ets) oncogene related (Erg), mRNA                                  | AV329219        | 1.63  | 2.61  | 2.58  | 0.005 |
| Carboxypeptidase N, polypeptide 2, mRNA (cDNA clone IMAGE:5135502)                                      | BC025836        | 1.56  | 2.99  | 1.83  | 0.008 |
| CB1 cannabinoid receptor (Cnr1)                                                                         | BQ177934        | 1.25  | 2.07  | 1.39  | 0.001 |
| CDNA fis, clone TRACH3037696                                                                            | BB762627        | 1.32  | 2.18  | 1.35  | 0.001 |
| Complexin 1, mRNA (cDNA clone MGC:25327 IMAGE:4527117)                                                  | BC014803        | 1.77  | 2.52  | 2.08  | 0.009 |
| C-type lectin domain family 12, member B (Clec12b), mRNA                                                | AK016908        | 1.06  | 5.08  | 1.56  | 0.008 |
| D-aspartate oxidase (Ddo), mRNA                                                                         | BB021589        | 1.35  | 2.22  | 1.48  | 0.001 |
| Delta/notch-like EGF-related receptor (Dner), mRNA                                                      | AF370126        | 1.21  | 2.06  | 1.23  | 0.001 |
| Dickkopf-like 1, mRNA (cDNA clone MGC:7472 IMAGE:3490482)                                               | NM_015789       | 2.92  | 6.19  | 3.81  | 0.003 |
| embryonal Fyn-associated substrate                                                                      | BB168690        | 1.2   | 2.06  | 1.85  | 0.001 |
| Eph receptor A5 (Epha5), mRNA                                                                           | BE951744        | 1.86  | 6.76  | 3.67  | 0.004 |
| Eph receptor A7, mRNA (cDNA clone MGC:14056 IMAGE:3991628)                                              | BC026153        | 1.17  | 2.22  | 1.15  | 0.001 |
| ESTs                                                                                                    | BB354954        | 5.21  | 6     | 3.38  | 0.004 |
| ESTs                                                                                                    | C87349          | 2.57  | 6.33  | 4.03  | 0.009 |
| ESTs                                                                                                    | BB318702        | 1.23  | 2.64  | 1.97  | 0.001 |
| ESTs                                                                                                    | BB391156        | 1.63  | 2.65  | 1.81  | 0.005 |

|                                                                                                                                                  |           |      |      |       |       |
|--------------------------------------------------------------------------------------------------------------------------------------------------|-----------|------|------|-------|-------|
| ESTs, Weakly similar to GNMSLL retrovirus-related reverse transcriptase homolog - mouse retrotransposon (M.musculus) expressed sequence AI876438 | AI506532  | 1.36 | 2.33 | 1.7   | 0.007 |
| expressed sequence C80278                                                                                                                        | BB039510  | 1.1  | 2.26 | 1.25  | 0.001 |
| fibromodulin                                                                                                                                     | BG066770  | 1.78 | 6.03 | 1.2   | 0.001 |
| Fibromodulin (Fmod), mRNA                                                                                                                        | BB235530  | 1.17 | 2.77 | 1.86  | 0.009 |
| Fibronectin type 3 and SPRY domain-containing protein (Fsd1), mRNA                                                                               | BB532202  | 1.18 | 2.42 | 1.18  | 0.001 |
| Forkhead box M1, mRNA (cDNA clone IMAGE:3589714)                                                                                                 | BQ175318  | 1.54 | 3.45 | 1.98  | 0.005 |
| Fucosyltransferase 4 (Fut4), mRNA                                                                                                                | BB398835  | 2.48 | 6.06 | 0.73  | 0.004 |
| G protein-coupled receptor 116 (Gpr116), mRNA                                                                                                    | AV309809  | 1    | 1.01 | 0.46  | 0.001 |
| Ganglioside-induced differentiation-associated-protein 1 (Gdap1), mRNA                                                                           | AW547876  | 1.19 | 2.08 | 1.65  | 0.001 |
| Glutamate receptor, ionotropic, kainate 2 (beta 2) (Grik2), transcript variant 2, mRNA                                                           | AU017649  | 1.42 | 2.25 | 1.8   | 0.001 |
| Glycoprotein m6a (Gpm6a), mRNA                                                                                                                   | BB355480  | 2.69 | 6.84 | 5.97  | 0.009 |
| Guanylate binding protein 1 (Gbp1), mRNA                                                                                                         | BB348674  | 1.38 | 3.23 | 2.4   | 0.001 |
| High mobility group box transcription factor 1 (Hbp1), transcript variant 1, mRNA                                                                | NM_010259 | 1.43 | 2.11 | 2.02  | 0.005 |
| Inhibitor of DNA binding 4 (Id4), mRNA                                                                                                           | BB399042  | 1.01 | 1.1  | -2    | 0.004 |
| Kelch-like 4 (Drosophila), mRNA (cDNA clone MGC:176212 IMAGE:9055863)                                                                            | AI323288  | 1.52 | 1.67 | -2.38 | 0.008 |
| Keratin associated protein 2-4, mRNA (cDNA clone MGC:157549 IMAGE:40135467)                                                                      | BB037068  | 1.46 | 2.14 | 1.48  | 0.001 |
| Kinectin 1 (Ktn1), mRNA                                                                                                                          | AK017442  | 4.53 | 8.28 | 6.57  | 0.006 |
| Kinesin light chain 3 (Klc3), mRNA                                                                                                               | AW538151  | 2.48 | 4.35 | -1.54 | 0.005 |
| Lipase, family member M, mRNA (cDNA clone MGC:25790 IMAGE:4020396)                                                                               | BC017147  | 2.01 | 2.86 | 2.66  | 0.004 |
| Lipocalin 8 (Lcn8), mRNA                                                                                                                         | BB151055  | 1.48 | 2.62 | 2.54  | 0.005 |
|                                                                                                                                                  | NM_033145 | 2.33 | 2.46 | 1.77  | 0.004 |

|                                                                                 |           |      |      |       |       |
|---------------------------------------------------------------------------------|-----------|------|------|-------|-------|
| MacroH2A2                                                                       | AW547431  | 2.07 | 2.28 | 2.08  | 0.002 |
| MAP Kinase Kinase                                                               | BB540608  | 3.07 | 3.4  | 1.77  | 0.001 |
| MKIAA1613 protein                                                               | AI429745  | 1.19 | 2.33 | 1.95  | 0.005 |
| MKIAA4170 protein                                                               | BB196537  | 3.42 | 9.81 | 6.38  | 0.003 |
| Multimerin 1, mRNA (cDNA clone MGC:178345 IMAGE:9053337)                        | BB035005  | 1.42 | 2.1  | 1.42  | 0.001 |
| Multimerin 2 (Mmrn2), mRNA                                                      | AV319507  | 1.34 | 2.28 | 1.89  | 0.001 |
| Myc target 1 (Myct1), mRNA                                                      | AI642973  | 1.85 | 3.33 | 1.79  | 0.001 |
| Netrin 1, mRNA (cDNA clone IMAGE:4952261)                                       | NM_008744 | 3.37 | 3.73 | 2.89  | 0.005 |
| Neurensin 1 (Nrsn1), mRNA                                                       | NM_009513 | 1.41 | 2.39 | 1.7   | 0.001 |
| Neuron specific gene family member 2, mRNA (cDNA clone MGC:25346 IMAGE:4527900) | NM_008741 | 1.18 | 2.05 | 1.54  | 0.001 |
| Neuropeptide Y receptor Y5 (Npy5r), mRNA                                        | NM_016708 | 2.38 | 3.16 | 2.56  | 0.007 |
| Period homolog 3 (Drosophila) (Per3), mRNA                                      | AW553065  | 2.26 | 2.36 | 1.06  | 0.001 |
| POU domain, class 3, transcription factor 1 (Pou3f1), mRNA                      | BG065255  | 2.05 | 4.93 | 4.57  | 0.001 |
| proteasome (prosome, macropain) subunit, alpha type 1                           | AV101011  | 2.09 | 2.32 | 1.89  | 0.001 |
| Protocadherin alpha 7 (Pcdha7), mRNA                                            | AW146252  | 1.34 | 2.34 | 1.49  | 0.001 |
| Reelin (Reln), mRNA                                                             | NM_011261 | 1.3  | 2.03 | 1.57  | 0.001 |
| Regulating synaptic membrane exocytosis 1 (Rims1), transcript variant 4, mRNA   | BQ044278  | 1.29 | 2.01 | 1.71  | 0.001 |
| RIKEN cDNA 1700007F22 gene                                                      | BE456717  | 1.04 | 3.23 | 3.21  | 0.004 |
| RIKEN cDNA 2410003J06 gene (2410003J06Rik), transcript variant 1, mRNA          | AK010362  | 2.1  | 9.83 | 5.13  | 0.001 |
| RIKEN cDNA 4930550C14 gene (4930550C14Rik), mRNA                                | AK016083  | 2.68 | 9.32 | 1.48  | 0.002 |
| RIKEN cDNA 4933434I06 gene (4933434I06Rik), mRNA                                | AK017056  | 1.01 | 1.21 | -2.94 | 0.004 |
| RIKEN cDNA A630033E08 gene (A630033E08Rik), transcript variant 1, mRNA          | BB788678  | 1.72 | 2.16 | 1.5   | 0.007 |
| RIKEN cDNA A730017C20 gene, mRNA (cDNA clone MGC:100035 IMAGE:30550997)         | BB247038  | 1.39 | 2.1  | 1.36  | 0.003 |
| RIKEN cDNA D630039A03 gene, mRNA (cDNA clone MGC:31685                          | AV370040  | 1    | 1.13 | -2.33 | 0.001 |

|                                                                                                                       |           |      |      |       |       |
|-----------------------------------------------------------------------------------------------------------------------|-----------|------|------|-------|-------|
| IMAGE:4911378)                                                                                                        |           |      |      |       |       |
| RNA-binding protein mHuC-S                                                                                            | AV334527  | 4.02 | 4.21 | 2.91  | 0.001 |
| Sal-like 2 (Drosophila) (Sall2), mRNA                                                                                 | NM_015772 | 1.32 | 2.09 | 1.94  | 0.001 |
| Seminal vesicle antigen-like 1 (Sval1), mRNA                                                                          | NM_027832 | 1.05 | 1.08 | -2.13 | 0.001 |
| SET and MYND domain containing 4 (Smyd4), mRNA                                                                        | BB021163  | 1.41 | 2.18 | 1.5   | 0.001 |
| SH3-domain GRB2-like (endophilin) interacting protein 1 (Sgip1), mRNA                                                 | AV344708  | 1.5  | 2.34 | 2.1   | 0.002 |
| Solute carrier family 5 (sodium-dependent vitamin transporter), member 6, mRNA (cDNA clone MGC:143850 IMAGE:40094012) | BF450030  | 1.1  | 1.15 | -2.13 | 0.001 |
| Solute carrier family 6 (neurotransmitter transporter, serotonin), member 4 (Slc6a4), mRNA                            | NM_010484 | 1.22 | 1.46 | -3.03 | 0.001 |
| Src homology 2 domain-containing transforming protein C2 (Shc2), mRNA                                                 | BE985684  | 3.8  | 4    | 3.62  | 0.004 |
| Synaptic cell adhesion molecule 1                                                                                     | NM_018770 | 1.28 | 2.01 | 1.76  | 0.001 |
| Transcribed locus                                                                                                     | AK004399  | 1.26 | 2.06 | 1.57  | 0.001 |
| Transcribed locus                                                                                                     | AK015734  | 1.6  | 3.8  | 2.06  | 0.001 |
| Transcribed locus                                                                                                     | BB077224  | 1.95 | 2.2  | 1.99  | 0.005 |
| Transcribed locus                                                                                                     | BQ176485  | 1.51 | 2.29 | 1.33  | 0.009 |
| Transcribed locus                                                                                                     | BB073503  | 1.03 | 2.9  | 1.74  | 0.006 |
| Transcribed locus                                                                                                     | BF463223  | 6.83 | 9.28 | 6.84  | 0.003 |
| Transcribed locus                                                                                                     | BG071979  | 3.04 | 6.25 | 2.86  | 0.002 |
| Transcribed locus                                                                                                     | BB383239  | 2.14 | 3.19 | 1.74  | 0.008 |
| Transcribed locus                                                                                                     | BM937727  | 1.19 | 2.02 | 1.57  | 0.001 |
| Transcribed locus                                                                                                     | BB107526  | 1.07 | 1.63 | -2.13 | 0.001 |
| Transcribed locus                                                                                                     | BE687029  | 2.34 | 2.35 | 2.28  | 0.001 |
| Transcribed locus                                                                                                     | BB495006  | 1.4  | 2.11 | 1.61  | 0.001 |
| Transcribed locus, moderately similar to XP_001064867.1 PREDICTED: hypothetical protein [Rattus norvegicus]           | AV278869  | 5.22 | 7.5  | 6.48  | 0.009 |
| Transcribed locus, strongly similar to XP_001479260.1 PREDICTED:                                                      | AV260466  | 1.7  | 6.03 | -1.01 | 0.001 |

|                                                                                                               |          |      |      |       |       |
|---------------------------------------------------------------------------------------------------------------|----------|------|------|-------|-------|
| hypothetical protein LOC73951 [Mus musculus]                                                                  |          |      |      |       |       |
| Transcribed locus, strongly similar to XP_995934.1 PREDICTED:<br>hypothetical protein LOC76516 [Mus musculus] | AI427073 | 1.15 | 1.16 | -2.22 | 0.008 |
| Transmembrane protein 130, mRNA (cDNA clone MGC:157450<br>IMAGE:40093666)                                     | AV173792 | 1.05 | 2    | 1.13  | 0.002 |
| Uroplakin 3B, mRNA (cDNA clone MGC:169366 IMAGE:8860761)                                                      | BQ084786 | 1.75 | 5.03 | 3.22  | 0.005 |
| Voltage-gated sodium channel mRNA                                                                             | BB452990 | 1.41 | 2.11 | 1.9   | 0.001 |

**(-) represents fold down regulation from day 0 control.**
