# Supplementary material
Source: PubMed Central journal article supplement (PMC3026350)
Supplement: tableS8.pdf [file tableS8.pdf]

**Table H: D0<D2>D4>D6**

| Gene Title                                                                                                               | Gene Identifier | D2/D0 | D4/D0 | D6/D0 | P     |
|--------------------------------------------------------------------------------------------------------------------------|-----------------|-------|-------|-------|-------|
| Ankyrin repeat and IBR domain containing 1, mRNA (cDNA clone MGC:179082 IMAGE:9054074)                                   | AK014523        | 1.05  | -2.04 | -2.17 | 0.004 |
| Ankyrin repeat domain 44, mRNA (cDNA clone MGC:198807 IMAGE:9054388)                                                     | AI315673        | 1.53  | 1.29  | -2.13 | 0.009 |
| Annexin A13 (Anxa13), mRNA                                                                                               | BC013521        | 1.16  | -1.05 | -2.5  | 0.001 |
| ATPase, Ca <sup>++</sup> transporting, type 2C, member 2, mRNA (cDNA clone IMAGE:4984604)                                | AK007419        | 1.16  | -1.09 | -2.08 | 0.001 |
| CDNA clone IMAGE:9053535                                                                                                 | BB335888        | 1.36  | 1.02  | -4.17 | 0.007 |
| CDNA fis, clone TRACH3029665, weakly similar to Zinc finger protein 84                                                   | AI852969        | 1.03  | -1.3  | -2.38 | 0.004 |
| Chemokine (C-C motif) receptor-like 1 (Ccr11), mRNA                                                                      | AF306532        | 1.2   | 1.1   | -2.04 | 0.006 |
| Clone 1.5A LB9 mRNA, 3' UTR                                                                                              | U20265          | 4.57  | 1.8   | 1.1   | 0.006 |
| Cytochrome P450, family 2, subfamily c, polypeptide 68, mRNA (cDNA clone MGC:28459 IMAGE:4160492)                        | AI265721        | 1.2   | 1.13  | -4.76 | 0.001 |
| D site albumin promoter binding protein, mRNA (cDNA clone MGC:18803 IMAGE:4195116)                                       | BC018323        | 3.47  | 2.3   | -1.49 | 0.001 |
| DNA segment, Chr 2, ERATO Doi 239, expressed                                                                             | C79214          | 2.76  | 1.96  | -1.35 | 0.006 |
| EST                                                                                                                      | AV034993        | 3.36  | 2.34  | 2.09  | 0.006 |
| ESTs                                                                                                                     | BB442009        | 6.9   | 5.87  | 3.12  | 0.007 |
| ESTs                                                                                                                     | BB732233        | 2.47  | 2.11  | -1.09 | 0.001 |
| ESTs                                                                                                                     | BB481761        | 3.45  | 1.18  | -1.67 | 0.008 |
| ESTs, Moderately similar to GNMSLL retrovirus-related reverse transcriptase homolog - mouse retrotransposon (M.musculus) | BI076611        | 1.4   | -1.3  | -2.78 | 0.002 |
| ESTs, Weakly similar to TYROSINE-PROTEIN KINASE JAK3 (M.musculus)                                                        | BB796950        | 1.16  | -1.3  | -2.17 | 0.001 |
| Golgi phosphoprotein 3-like (Golp31), mRNA                                                                               | BC027194        | 1.05  | -1.37 | -2    | 0.001 |
| Guanylate cyclase 2g (Gucy2g), mRNA                                                                                      | BB427699        | 2.01  | 1.73  | -2.94 | 0.001 |

|                                                                                      |           |      |       |       |       |
|--------------------------------------------------------------------------------------|-----------|------|-------|-------|-------|
| Hexaribonucleotide binding protein 3 (Hrnbp3)                                        | BB386621  | 4.09 | 3.05  | 2.85  | 0.001 |
| Hydroxyacid oxidase (glycolate oxidase) 3, mRNA (cDNA clone MGC:29258 IMAGE:5064100) | NM_019545 | 1.01 | -1.05 | -2.44 | 0.001 |
| Indian hedgehog (Ihh), mRNA                                                          | NM_010544 | 1.07 | -1.45 | -2.22 | 0.001 |
| Kallikrein 1-related peptidase b9 (Klk1b9), mRNA                                     | M17962    | 1.03 | -1.3  | -3.85 | 0.001 |
| Mouse, glutathione transferase GT9.3 mRNA, 3' end                                    | J03953    | 1.11 | -1.54 | -2.33 | 0.001 |
| Mu opioid receptor variant A                                                         | AF260307  | 2.78 | 1.81  | -1.14 | 0.008 |
| Myelin protein zero-like 2, mRNA (cDNA clone MGC:13828 IMAGE:4188907)                | BC015076  | 1    | -1.54 | -2.08 | 0.001 |
| Nephroblastoma overexpressed gene, mRNA (cDNA clone MGC:5979 IMAGE:3494896)          | X96585    | 1.1  | -1.37 | -2.44 | 0.001 |
| Nuclear receptor subfamily 1, group I, member 3, mRNA (cDNA clone IMAGE:5052215)     | AF009328  | 1.53 | -1.09 | -3.57 | 0.005 |
| Phosphatidylserine synthase 2, mRNA (cDNA clone IMAGE:3583796)                       | AI596401  | 1.31 | -4.35 | -4.35 | 0.001 |
| Poliovirus receptor-related 3 (Pvrl3), transcript variant gamma, mRNA                | NM_021496 | 1.09 | -1.92 | -2.33 | 0.008 |
| Potassium channel, subfamily K, member 5 (Kcnk5), mRNA                               | AF319542  | 1    | -1.22 | -2.22 | 0.001 |
| PR domain containing 14 (Prdm14), mRNA                                               | BB283625  | 1.32 | 1.21  | -2.63 | 0.005 |
| PREDICTED: Mus musculus predicted gene, EG665934 (EG665934), mRNA                    | AV378858  | 2.53 | 2.43  | -1.75 | 0.004 |
| RASD family, member 2, mRNA (cDNA clone IMAGE:4988981)                               | BC026377  | 1.14 | -1.52 | -3.13 | 0.001 |
| RIKEN cDNA 2210020M01 gene, mRNA (cDNA clone IMAGE:1179778)                          | BE852759  | 1.06 | -1.03 | -2.17 | 0.002 |
| RIKEN cDNA 2310044G17 gene, mRNA (cDNA clone MGC:31149 IMAGE:4168224)                | AK009800  | 1.13 | -1.43 | -2.27 | 0.001 |
| RIKEN cDNA 9130414P19 gene                                                           | AK018677  | 1.13 | 1.02  | -4.35 | 0.001 |
| Solute carrier family 20, member 1, mRNA (cDNA clone MGC:14029 IMAGE:4015575)        | NM_015747 | 1.1  | -1.16 | -3.03 | 0.001 |

|                                                                                                                               |           |      |       |       |       |
|-------------------------------------------------------------------------------------------------------------------------------|-----------|------|-------|-------|-------|
| sphingosine kinase 2                                                                                                          | BB550183  | 3.81 | 2.73  | -1.25 | 0.001 |
| sulfotransferase family 1A, phenol-preferring, member 1                                                                       | AK002700  | 1.02 | 1.01  | -2.04 | 0.001 |
| T-box 4 (Tbx4)                                                                                                                | AY075134  | 3.72 | 1.28  | -1.67 | 0.003 |
| Transcribed locus                                                                                                             | BB097972  | 1    | -1.01 | -2.5  | 0.007 |
| Transcribed locus                                                                                                             | AV356118  | 1.05 | -1.54 | -2.04 | 0.001 |
| Transcribed locus                                                                                                             | AK016405  | 4.43 | 1.9   | 1.68  | 0.007 |
| Transcribed locus                                                                                                             | BB667588  | 4.45 | 3.39  | 1.17  | 0.004 |
| Transcribed locus                                                                                                             | BB283300  | 1.09 | -1.14 | -5.26 | 0.001 |
| Transcribed locus                                                                                                             | BB465699  | 1.05 | -2    | -3.33 | 0.001 |
| Transcribed locus                                                                                                             | BM120390  | 2.48 | 1.71  | -3.13 | 0.009 |
| Transcribed locus                                                                                                             | BB440150  | 2.49 | 1.74  | -1.89 | 0.008 |
| Transcribed locus, strongly similar to NP_037393.1 peroxisome proliferator-activated receptor gamma, coactivator 1 alpha [Hom | BM120569  | 1.03 | -1.05 | -2.5  | 0.001 |
| Transmembrane protease, serine 2, mRNA (cDNA clone MGC:6821 IMAGE:2648878)                                                    | BM250339  | 1.26 | 1     | -2.44 | 0.003 |
| Tubulin tyrosine ligase-like family, member 7, mRNA (cDNA clone MGC:169898 IMAGE:8861293)                                     | AK014905  | 1.3  | -1.04 | -2.63 | 0.009 |
| Uroporphyrinogen III synthase (Uros), mRNA                                                                                    | AI415298  | 2.61 | 1.8   | -1.05 | 0.002 |
| Zinc finger protein 365, mRNA (cDNA clone MGC:189953 IMAGE:9088140)                                                           | BB277790  | 1.05 | -3.03 | -9.09 | 0.001 |
| Zonadhesin (Zan), mRNA                                                                                                        | NM_011741 | 1    | -1.01 | -4.76 | 0.001 |

**(-) represents fold down regulation from day 0 control.**
